# Supplementary material
Source: PubMed Central journal article supplement (PMC3210299)
Supplement: cam0504_0315SD1.pdf [file cam0504_0315SD1.pdf]

Supplemental Figure 1. SNAI2 dependent gene expression changes in UM-SCC-38 cells.

| P-value   | FDR       | Fold-change (Slug/Neo Control) | Probe set                   | Gene symbol                  | Description                                                                                   |
|-----------|-----------|--------------------------------|-----------------------------|------------------------------|-----------------------------------------------------------------------------------------------|
| 4.00E-07  | 3.77E-05  | 125.764                        | <a href="#">215076_s_at</a> | <a href="#">COL3A1</a>       | collagen, type III, alpha 1                                                                   |
| 6.50E-06  | 8.10E-05  | 77.033                         | <a href="#">212464_s_at</a> | <a href="#">FN1</a>          | fibronectin 1                                                                                 |
| 4.00E-07  | 3.77E-05  | 73.860                         | <a href="#">211719_x_at</a> | <a href="#">FN1</a>          | fibronectin 1                                                                                 |
| 1.80E-06  | 5.65E-05  | 68.125                         | <a href="#">201852_x_at</a> | <a href="#">COL3A1</a>       | collagen, type III, alpha 1                                                                   |
| 9.00E-07  | 5.36E-05  | 60.721                         | <a href="#">216442_x_at</a> | <a href="#">FN1</a>          | fibronectin 1                                                                                 |
| 5.30E-06  | 7.44E-05  | 52.226                         | <a href="#">211161_s_at</a> | <a href="#">COL3A1</a>       | collagen, type III, alpha 1                                                                   |
| 1.50E-06  | 5.65E-05  | 50.446                         | <a href="#">210495_x_at</a> | <a href="#">FN1</a>          | fibronectin 1                                                                                 |
| 3.00E-07  | 3.57E-05  | 34.892                         | <a href="#">225242_s_at</a> | <a href="#">CCDC80</a>       | coiled-coil domain containing 80                                                              |
| 1.00E-07  | 3.57E-05  | 31.631                         | <a href="#">212764_at</a>   | <a href="#">ZEB1</a>         | zinc finger E-box binding homeobox 1                                                          |
| 1.70E-06  | 5.65E-05  | 31.440                         | <a href="#">201280_s_at</a> | <a href="#">DAB2</a>         | disabled homolog 2, mitogen-responsive phosphoprotein (Drosophila)                            |
| 6.80E-06  | 8.13E-05  | 29.978                         | <a href="#">202627_s_at</a> | <a href="#">SERPINE1</a>     | serpin peptidase inhibitor, clade E (nexin, plasminogen activator inhibitor type 1), member 1 |
| 3.58E-05  | 0.0001783 | 29.051                         | <a href="#">235236_at</a>   | <a href="#">LOC100131897</a> | Uncharacterized protein LOC100131897                                                          |
| 7.60E-06  | 8.38E-05  | 28.914                         | <a href="#">202628_s_at</a> | <a href="#">SERPINE1</a>     | serpin peptidase inhibitor, clade E (nexin, plasminogen activator inhibitor type 1), member 1 |
| 1.20E-06  | 5.65E-05  | 28.279                         | <a href="#">201278_at</a>   | <a href="#">DAB2</a>         | disabled homolog 2, mitogen-responsive phosphoprotein (Drosophila)                            |
| 3.00E-07  | 3.57E-05  | 27.903                         | <a href="#">202998_s_at</a> | <a href="#">LOXL2</a>        | lysyl oxidase-like 2                                                                          |
| 5.58E-05  | 0.0002302 | 25.733                         | <a href="#">203700_s_at</a> | <a href="#">DIO2</a>         | deiodinase, iodothyronine, type II                                                            |
| 1.89E-05  | 0.0001291 | 25.347                         | <a href="#">226218_at</a>   | <a href="#">IL7R</a>         | interleukin 7 receptor                                                                        |
| 0.0001374 | 0.0003977 | 24.015                         | <a href="#">231240_at</a>   | <a href="#">DIO2</a>         | deiodinase, iodothyronine, type II                                                            |
| 2.70E-06  | 6.21E-05  | 23.453                         | <a href="#">218332_at</a>   | <a href="#">BEX1</a>         | brain expressed, X-linked 1                                                                   |
| 1.90E-06  | 5.65E-05  | 23.422                         | <a href="#">201426_s_at</a> | <a href="#">VIM</a>          | vimentin                                                                                      |
| 1.90E-06  | 5.65E-05  | 22.666                         | <a href="#">215446_s_at</a> | <a href="#">LOX</a>          | lysyl oxidase                                                                                 |
| 3.00E-07  | 3.57E-05  | 20.409                         | <a href="#">210757_x_at</a> | <a href="#">DAB2</a>         | disabled homolog 2, mitogen-responsive phosphoprotein (Drosophila)                            |
| 2.97E-05  | 0.0001658 | 19.681                         | <a href="#">235004_at</a>   | <a href="#">RBM24</a>        | RNA binding motif protein 24                                                                  |
| 3.40E-06  | 6.74E-05  | 18.980                         | <a href="#">203699_s_at</a> | <a href="#">DIO2</a>         | deiodinase, iodothyronine, type II                                                            |
| 4.00E-07  | 3.77E-05  | 17.842                         | <a href="#">201279_s_at</a> | <a href="#">DAB2</a>         | disabled homolog 2, mitogen-responsive phosphoprotein (Drosophila)                            |
| 1.80E-06  | 5.65E-05  | 17.442                         | <a href="#">239218_at</a>   | <a href="#">PDE1C</a>        | phosphodiesterase 1C, calmodulin-dependent 70kDa                                              |
| 8.49E-05  | 0.0003004 | 16.772                         | <a href="#">219935_at</a>   | <a href="#">ADAMTSS5</a>     | ADAM metallopeptidase with thrombospondin type 1 motif, 5                                     |
| 1.00E-07  | 3.57E-05  | 16.169                         | <a href="#">220014_at</a>   | <a href="#">PRR16</a>        | proline rich 16                                                                               |
| 3.12E-05  | 0.0001676 | 16.004                         | <a href="#">215767_at</a>   | <a href="#">ZNF804A</a>      | zinc finger protein 804A                                                                      |
| 9.70E-06  | 9.41E-05  | 15.927                         | <a href="#">231867_at</a>   | <a href="#">ODZ2</a>         | odz, odd Oz/ten-m homolog 2 (Drosophila)                                                      |
| 1.90E-06  | 5.65E-05  | 15.657                         | <a href="#">222862_s_at</a> | <a href="#">AK5</a>          | adenylate kinase 5                                                                            |
| 7.10E-06  | 8.26E-05  | 15.590                         | <a href="#">224823_at</a>   | <a href="#">MYLK</a>         | myosin light chain kinase                                                                     |
| 4.70E-06  | 7.04E-05  | 13.947                         | <a href="#">201645_at</a>   | <a href="#">TNC</a>          | tenascin C                                                                                    |
| 0.0001379 | 0.0003977 | 13.742                         | <a href="#">1555673_at</a>  | <a href="#">KRTAP2-1</a>     | keratin associated protein 2-1                                                                |
| 9.70E-06  | 9.41E-05  | 13.477                         | <a href="#">204584_at</a>   | <a href="#">L1CAM</a>        | L1 cell adhesion molecule                                                                     |
| 1.40E-06  | 5.65E-05  | 13.437                         | <a href="#">211340_s_at</a> | <a href="#">MCAM</a>         | melanoma cell adhesion molecule                                                               |
| 1.00E-07  | 3.57E-05  | 13.347                         | <a href="#">203060_s_at</a> | <a href="#">PAPSS2</a>       | 3-adenosine 5-phosphosulfate synthase 2                                                       |
| 2.46E-05  | 0.0001487 | 13.265                         | <a href="#">211959_at</a>   | <a href="#">IGFBP5</a>       | insulin-like growth factor binding protein 5                                                  |
| 8.70E-06  | 9.19E-05  | 12.976                         | <a href="#">236344_at</a>   | <a href="#">PDE1C</a>        | phosphodiesterase 1C, calmodulin-dependent 70kDa                                              |
| 4.69E-05  | 0.0002039 | 12.950                         | <a href="#">209101_at</a>   | <a href="#">CTGF</a>         | connective tissue growth factor                                                               |

|           |           |        |                             |                           |                                                                                    |
|-----------|-----------|--------|-----------------------------|---------------------------|------------------------------------------------------------------------------------|
| 0.0002393 | 0.0005894 | 12.705 | <a href="#">1570155_at</a>  | <a href="#">NA</a>        | NA                                                                                 |
| 1.30E-06  | 5.65E-05  | 12.693 | <a href="#">225793_at</a>   | <a href="#">LIX1L</a>     | Lix1 homolog (mouse)-like                                                          |
| 9.00E-07  | 5.36E-05  | 12.676 | <a href="#">202766_s_at</a> | <a href="#">FBN1</a>      | fibrillin 1                                                                        |
| 2.00E-06  | 5.72E-05  | 12.521 | <a href="#">230147_at</a>   | <a href="#">F2RL2</a>     | coagulation factor II (thrombin) receptor-like 2                                   |
| 7.80E-06  | 8.44E-05  | 12.282 | <a href="#">203440_at</a>   | <a href="#">CDH2</a>      | cadherin 2, type 1, N-cadherin (neuronal)                                          |
| 3.30E-06  | 6.60E-05  | 12.076 | <a href="#">229461_x_at</a> | <a href="#">NEGR1</a>     | neuronal growth regulator 1                                                        |
| 8.52E-05  | 0.0003009 | 11.808 | <a href="#">229228_at</a>   | <a href="#">CREB5</a>     | cAMP responsive element binding protein 5                                          |
| 1.40E-06  | 5.65E-05  | 11.572 | <a href="#">204472_at</a>   | <a href="#">GEM</a>       | GTP binding protein overexpressed in skeletal muscle                               |
| 9.80E-06  | 9.43E-05  | 11.556 | <a href="#">212077_at</a>   | <a href="#">CALD1</a>     | caldesmon 1                                                                        |
| 3.05E-05  | 0.0001676 | 11.404 | <a href="#">205798_at</a>   | <a href="#">IL7R</a>      | interleukin 7 receptor                                                             |
| 3.60E-06  | 6.75E-05  | 11.159 | <a href="#">200982_s_at</a> | <a href="#">ANXA6</a>     | annexin A6                                                                         |
| 1.90E-06  | 5.65E-05  | 10.776 | <a href="#">228335_at</a>   | <a href="#">CLDN11</a>    | claudin 11                                                                         |
| 1.20E-06  | 5.65E-05  | 10.623 | <a href="#">206969_at</a>   | <a href="#">KRT34</a>     | keratin 34                                                                         |
| 1.70E-05  | 0.000122  | 10.574 | <a href="#">229357_at</a>   | <a href="#">ADAMTS5</a>   | ADAM metalloproteinase with thrombospondin type 1 motif, 5                         |
| 5.90E-06  | 7.80E-05  | 10.247 | <a href="#">243818_at</a>   | <a href="#">SFTA1P</a>    | surfactant associated 1 (pseudogene)                                               |
| 2.00E-06  | 5.72E-05  | 10.037 | <a href="#">213790_at</a>   | <a href="#">ADAM12</a>    | ADAM metalloproteinase domain 12                                                   |
| 0.0002596 | 0.0006198 | 9.684  | <a href="#">235518_at</a>   | <a href="#">SLC8A1</a>    | solute carrier family 8 (sodium/calcium exchanger), member 1                       |
| 3.59E-05  | 0.0001784 | 9.477  | <a href="#">235417_at</a>   | <a href="#">SPOCD1</a>    | SPOC domain containing 1                                                           |
| 1.19E-05  | 0.0001035 | 9.354  | <a href="#">226237_at</a>   | <a href="#">NA</a>        | NA                                                                                 |
| 0.0001207 | 0.0003668 | 9.262  | <a href="#">232914_s_at</a> | <a href="#">SYTL2</a>     | synaptotagmin-like 2                                                               |
| 1.78E-05  | 0.0001254 | 9.051  | <a href="#">202237_at</a>   | <a href="#">NNMT</a>      | nicotinamide N-methyltransferase                                                   |
| 1.95E-05  | 0.0001304 | 8.832  | <a href="#">200665_s_at</a> | <a href="#">SPARC</a>     | secreted protein, acidic, cysteine-rich (osteonectin)                              |
| 2.04E-05  | 0.0001345 | 8.757  | <a href="#">201616_s_at</a> | <a href="#">CALD1</a>     | caldesmon 1                                                                        |
| 4.33E-05  | 0.0001946 | 8.719  | <a href="#">238919_at</a>   | <a href="#">NA</a>        | NA                                                                                 |
| 4.00E-07  | 3.77E-05  | 8.686  | <a href="#">235368_at</a>   | <a href="#">ADAMTS5</a>   | ADAM metalloproteinase with thrombospondin type 1 motif, 5                         |
| 9.00E-07  | 5.36E-05  | 8.506  | <a href="#">221584_s_at</a> | <a href="#">KCNMA1</a>    | potassium large conductance calcium-activated channel, subfamily M, alpha member 1 |
| 1.20E-05  | 0.0001036 | 8.390  | <a href="#">232235_at</a>   | <a href="#">DSEL</a>      | dermatan sulfate epimerase-like                                                    |
| 6.00E-07  | 4.84E-05  | 8.370  | <a href="#">209087_x_at</a> | <a href="#">MCAM</a>      | melanoma cell adhesion molecule                                                    |
| 4.96E-05  | 0.000214  | 8.347  | <a href="#">204298_s_at</a> | <a href="#">LOX</a>       | lysyl oxidase                                                                      |
| 0.0001568 | 0.0004313 | 8.264  | <a href="#">213416_at</a>   | <a href="#">ITGA4</a>     | integrin, alpha 4 (antigen CD49D, alpha 4 subunit of VLA-4 receptor)               |
| 1.16E-05  | 0.0001021 | 8.204  | <a href="#">203058_s_at</a> | <a href="#">PAPSS2</a>    | 3-adenosine 5-phosphosulfate synthase 2                                            |
| 1.53E-05  | 0.0001177 | 7.969  | <a href="#">227061_at</a>   | <a href="#">NA</a>        | NA                                                                                 |
| 2.68E-05  | 0.0001554 | 7.880  | <a href="#">212607_at</a>   | <a href="#">AKT3</a>      | v-akt murine thymoma viral oncogene homolog 3 (protein kinase B, gamma)            |
| 0.0002017 | 0.0005147 | 7.880  | <a href="#">227123_at</a>   | <a href="#">RAB3B</a>     | RAB3B, member RAS oncogene family                                                  |
| 6.10E-06  | 7.93E-05  | 7.877  | <a href="#">226777_at</a>   | <a href="#">NA</a>        | NA                                                                                 |
| 1.21E-05  | 0.0001036 | 7.766  | <a href="#">229004_at</a>   | <a href="#">NA</a>        | NA                                                                                 |
| 3.90E-06  | 6.75E-05  | 7.530  | <a href="#">227099_s_at</a> | <a href="#">LOC387763</a> | hypothetical protein LOC387763                                                     |
| 0.0001203 | 0.0003667 | 7.479  | <a href="#">202007_at</a>   | <a href="#">NID1</a>      | nidogen 1                                                                          |
| 3.00E-06  | 6.40E-05  | 7.403  | <a href="#">210869_s_at</a> | <a href="#">MCAM</a>      | melanoma cell adhesion molecule                                                    |
| 5.45E-05  | 0.0002265 | 7.253  | <a href="#">215743_at</a>   | <a href="#">NMT2</a>      | N-myristoyltransferase 2                                                           |
| 0.00012   | 0.0003667 | 7.142  | <a href="#">238447_at</a>   | <a href="#">RBMS3</a>     | RNA binding motif, single stranded interacting protein                             |
| 0.0001378 | 0.0003977 | 7.131  | <a href="#">205525_at</a>   | <a href="#">CALD1</a>     | caldesmon 1                                                                        |
| 0.0007644 | 0.0013652 | 7.113  | <a href="#">226136_at</a>   | <a href="#">GLIPR1</a>    | GLI pathogenesis-related 1                                                         |

|           |           |       |                              |                          |                                                                |
|-----------|-----------|-------|------------------------------|--------------------------|----------------------------------------------------------------|
| 0.0001117 | 0.0003517 | 7.105 | <a href="#">213325 at</a>    | <a href="#">PVRL3</a>    | poliovirus receptor-related 3                                  |
| 0.0001951 | 0.0005038 | 7.094 | <a href="#">237411 at</a>    | <a href="#">ADAMTS6</a>  | ADAM metalloproteinase with thrombospondin type 1 motif, 6     |
| 4.89E-05  | 0.0002114 | 7.033 | <a href="#">1555579 s at</a> | <a href="#">PTPRM</a>    | protein tyrosine phosphatase, receptor type, M                 |
| 3.60E-06  | 6.75E-05  | 7.003 | <a href="#">244503 at</a>    | <a href="#">NA</a>       | NA                                                             |
| 1.51E-05  | 0.0001177 | 7.003 | <a href="#">209118 s at</a>  | <a href="#">TUBA1A</a>   | tubulin, alpha 1a                                              |
| 1.16E-05  | 0.0001021 | 6.813 | <a href="#">227828 s at</a>  | <a href="#">FAM176A</a>  | family with sequence similarity 176, member A                  |
| 2.18E-05  | 0.0001396 | 6.812 | <a href="#">200644 at</a>    | <a href="#">MARCKSL1</a> | MARCKS-like 1                                                  |
| 0.0001251 | 0.0003722 | 6.787 | <a href="#">219937 at</a>    | <a href="#">TRHDE</a>    | thyrotropin-releasing hormone degrading enzyme                 |
| 1.91E-05  | 0.0001292 | 6.763 | <a href="#">226751 at</a>    | <a href="#">CNRIP1</a>   | cannabinoid receptor interacting protein 1                     |
| 9.05E-05  | 0.0003099 | 6.697 | <a href="#">223614 at</a>    | <a href="#">MMP16</a>    | matrix metalloproteinase 16 (membrane-inserted)                |
| 1.50E-06  | 5.65E-05  | 6.672 | <a href="#">205006 s at</a>  | <a href="#">NMT2</a>     | N-myristoyltransferase 2                                       |
| 5.80E-05  | 0.0002346 | 6.662 | <a href="#">226834 at</a>    | <a href="#">NA</a>       | NA                                                             |
| 2.60E-06  | 6.21E-05  | 6.579 | <a href="#">203895 at</a>    | <a href="#">PLCB4</a>    | phospholipase C, beta 4                                        |
| 5.67E-05  | 0.0002314 | 6.551 | <a href="#">232458 at</a>    | <a href="#">COL3A1</a>   | collagen, type III, alpha 1                                    |
| 1.59E-05  | 0.000119  | 6.486 | <a href="#">218380 at</a>    | <a href="#">NLRP1</a>    | NLR family, pyrin domain containing 1                          |
| 0.0001014 | 0.0003289 | 6.472 | <a href="#">205003 at</a>    | <a href="#">DOCK4</a>    | dedicator of cytokinesis 4                                     |
| 2.80E-06  | 6.21E-05  | 6.462 | <a href="#">210517 s at</a>  | <a href="#">AKAP12</a>   | A kinase (PRKA) anchor protein 12                              |
| 9.14E-05  | 0.0003106 | 6.461 | <a href="#">205547 s at</a>  | <a href="#">TAGLN</a>    | transgelin                                                     |
| 2.00E-07  | 3.57E-05  | 6.439 | <a href="#">227846 at</a>    | <a href="#">GPR176</a>   | G protein-coupled receptor 176                                 |
| 2.35E-05  | 0.0001452 | 6.418 | <a href="#">219427 at</a>    | <a href="#">FAT4</a>     | FAT tumor suppressor homolog 4 (Drosophila)                    |
| 0.0003268 | 0.0007258 | 6.361 | <a href="#">210762 s at</a>  | <a href="#">DLC1</a>     | deleted in liver cancer 1                                      |
| 6.86E-05  | 0.0002607 | 6.342 | <a href="#">210105 s at</a>  | <a href="#">FYN</a>      | FYN oncogene related to SRC, FGR, YES                          |
| 0.0002669 | 0.0006302 | 6.320 | <a href="#">206382 s at</a>  | <a href="#">BDNF</a>     | brain-derived neurotrophic factor                              |
| 6.72E-05  | 0.0002584 | 6.301 | <a href="#">209031 at</a>    | <a href="#">CADM1</a>    | cell adhesion molecule 1                                       |
| 4.60E-06  | 7.04E-05  | 6.275 | <a href="#">228551 at</a>    | <a href="#">DENND5B</a>  | DENN/MADD domain containing 5B                                 |
| 0.0002058 | 0.0005234 | 6.270 | <a href="#">219179 at</a>    | <a href="#">DACT1</a>    | dapper, antagonist of beta-catenin, homolog 1 (Xenopus laevis) |
| 3.98E-05  | 0.0001887 | 6.230 | <a href="#">205005 s at</a>  | <a href="#">NMT2</a>     | N-myristoyltransferase 2                                       |
| 1.86E-05  | 0.0001286 | 6.204 | <a href="#">227503 at</a>    | <a href="#">NA</a>       | NA                                                             |
| 4.48E-05  | 0.0001978 | 6.161 | <a href="#">225275 at</a>    | <a href="#">EDIL3</a>    | EGF-like repeats and discoidin I-like domains 3                |
| 9.60E-05  | 0.0003192 | 6.143 | <a href="#">227529 s at</a>  | <a href="#">AKAP12</a>   | A kinase (PRKA) anchor protein 12                              |
| 4.43E-05  | 0.000196  | 6.123 | <a href="#">202952 s at</a>  | <a href="#">ADAM12</a>   | ADAM metalloproteinase domain 12                               |
| 1.70E-05  | 0.000122  | 6.114 | <a href="#">219140 s at</a>  | <a href="#">RBP4</a>     | retinol binding protein 4, plasma                              |
| 2.35E-05  | 0.0001452 | 5.998 | <a href="#">211343 s at</a>  | <a href="#">COL13A1</a>  | collagen, type XIII, alpha 1                                   |
| 0.0008583 | 0.0014882 | 5.954 | <a href="#">226142 at</a>    | <a href="#">GLIPR1</a>   | GLI pathogenesis-related 1                                     |
| 0.0002515 | 0.0006096 | 5.886 | <a href="#">205083 at</a>    | <a href="#">AOX1</a>     | aldehyde oxidase 1                                             |
| 6.54E-05  | 0.0002549 | 5.833 | <a href="#">239367 at</a>    | <a href="#">BDNF</a>     | brain-derived neurotrophic factor                              |
| 8.80E-06  | 9.21E-05  | 5.832 | <a href="#">206924 at</a>    | <a href="#">IL11</a>     | interleukin 11                                                 |
| 0.0007948 | 0.0014039 | 5.832 | <a href="#">237435 at</a>    | <a href="#">NA</a>       | NA                                                             |
| 0.0001974 | 0.000506  | 5.803 | <a href="#">205924 at</a>    | <a href="#">RAB3B</a>    | RAB3B, member RAS oncogene family                              |
| 6.00E-07  | 4.84E-05  | 5.794 | <a href="#">203139 at</a>    | <a href="#">DAPK1</a>    | death-associated protein kinase 1                              |
| 4.27E-05  | 0.0001945 | 5.792 | <a href="#">225496 s at</a>  | <a href="#">SYTL2</a>    | synaptotagmin-like 2                                           |
| 9.67E-05  | 0.0003206 | 5.780 | <a href="#">212158 at</a>    | <a href="#">SDC2</a>     | syndecan 2                                                     |
| 4.40E-06  | 6.91E-05  | 5.764 | <a href="#">227530 at</a>    | <a href="#">AKAP12</a>   | A kinase (PRKA) anchor protein 12                              |

|           |           |       |                              |                           |                                                                                                  |
|-----------|-----------|-------|------------------------------|---------------------------|--------------------------------------------------------------------------------------------------|
| 1.89E-05  | 0.0001291 | 5.757 | <a href="#">219308 s at</a>  | <a href="#">AK5</a>       | adenylate kinase 5                                                                               |
| 3.29E-05  | 0.000171  | 5.736 | <a href="#">210764 s at</a>  | <a href="#">CYR61</a>     | cysteine-rich, angiogenic inducer, 61                                                            |
| 2.45E-05  | 0.0001487 | 5.679 | <a href="#">229566 at</a>    | <a href="#">LOC645638</a> | similar to WDNM1-like protein                                                                    |
| 0.0002105 | 0.0005336 | 5.590 | <a href="#">227458 at</a>    | NA                        | NA                                                                                               |
| 8.77E-05  | 0.0003051 | 5.567 | <a href="#">229641 at</a>    | NA                        | NA                                                                                               |
| 1.61E-05  | 0.0001197 | 5.548 | <a href="#">235570 at</a>    | NA                        | NA                                                                                               |
| 0.0008001 | 0.0014089 | 5.526 | <a href="#">229437 at</a>    | <a href="#">MIRHG2</a>    | microRNA host gene 2 (non-protein coding)                                                        |
| 8.00E-07  | 5.36E-05  | 5.521 | <a href="#">202555 s at</a>  | <a href="#">MYLK</a>      | myosin light chain kinase                                                                        |
| 4.64E-05  | 0.0002025 | 5.463 | <a href="#">210220 at</a>    | <a href="#">FZD2</a>      | frizzled homolog 2 (Drosophila)                                                                  |
| 7.60E-06  | 8.38E-05  | 5.413 | <a href="#">1558280 s at</a> | <a href="#">ARHGAP29</a>  | Rho GTPase activating protein 29                                                                 |
| 1.26E-05  | 0.0001063 | 5.386 | <a href="#">235696 at</a>    | NA                        | NA                                                                                               |
| 4.31E-05  | 0.0001945 | 5.358 | <a href="#">236824 at</a>    | <a href="#">TMEM132B</a>  | transmembrane protein 132B                                                                       |
| 1.69E-05  | 0.000122  | 5.308 | <a href="#">204537 s at</a>  | <a href="#">GABRE</a>     | gamma-aminobutyric acid (GABA) A receptor, epsilon                                               |
| 2.61E-05  | 0.0001529 | 5.277 | <a href="#">230560 at</a>    | <a href="#">STXBP6</a>    | syntaxin binding protein 6 (amisyn)                                                              |
| 3.19E-05  | 0.0001701 | 5.233 | <a href="#">224822 at</a>    | <a href="#">DLC1</a>      | deleted in liver cancer 1                                                                        |
| 1.10E-05  | 9.99E-05  | 5.196 | <a href="#">201289 at</a>    | <a href="#">CYR61</a>     | cysteine-rich, angiogenic inducer, 61                                                            |
| 2.10E-06  | 5.78E-05  | 5.181 | <a href="#">202957 at</a>    | <a href="#">HCLS1</a>     | hematopoietic cell-specific Lyn substrate 1                                                      |
| 0.0002039 | 0.0005197 | 5.181 | <a href="#">215143 at</a>    | <a href="#">DPY19L2P2</a> | dpy-19-like 2 pseudogene 2 (C. elegans)                                                          |
| 6.62E-05  | 0.0002563 | 5.127 | <a href="#">201058 s at</a>  | <a href="#">MYL9</a>      | myosin, light chain 9, regulatory                                                                |
| 0.0002705 | 0.0006364 | 5.085 | <a href="#">1560573 at</a>   | <a href="#">LOC387895</a> | hypothetical gene supported by BC040060                                                          |
| 1.36E-05  | 0.000111  | 5.061 | <a href="#">204955 at</a>    | <a href="#">SRPX</a>      | sushi-repeat-containing protein, X-linked                                                        |
| 2.61E-05  | 0.0001529 | 5.035 | <a href="#">222162 s at</a>  | <a href="#">ADAMTS1</a>   | ADAM metalloproteinase with thrombospondin type 1 motif, 1                                       |
| 0.0008332 | 0.0014547 | 5.005 | <a href="#">226051 at</a>    | <a href="#">SELM</a>      | selenoprotein M                                                                                  |
| 0.0002277 | 0.0005651 | 4.969 | <a href="#">229580 at</a>    | NA                        | NA                                                                                               |
| 2.00E-07  | 3.57E-05  | 4.917 | <a href="#">212256 at</a>    | <a href="#">GALNT10</a>   | UDP-N-acetyl-alpha-D-galactosamine:polypeptide N-acetylgalactosaminyltransferase 10 (GalNAc-T10) |
| 9.65E-05  | 0.0003204 | 4.916 | <a href="#">205931 s at</a>  | <a href="#">CREB5</a>     | cAMP responsive element binding protein 5                                                        |
| 8.43E-05  | 0.0002992 | 4.869 | <a href="#">226756 at</a>    | NA                        | NA                                                                                               |
| 6.70E-05  | 0.0002581 | 4.848 | <a href="#">201312 s at</a>  | <a href="#">SH3BGRL</a>   | SH3 domain binding glutamic acid-rich protein like                                               |
| 1.03E-05  | 9.66E-05  | 4.841 | <a href="#">203562 at</a>    | <a href="#">FEZ1</a>      | fasciculation and elongation protein zeta 1 (zygin I)                                            |
| 0.0002412 | 0.0005928 | 4.839 | <a href="#">209909 s at</a>  | <a href="#">TGFB2</a>     | transforming growth factor, beta 2                                                               |
| 0.0001323 | 0.0003881 | 4.828 | <a href="#">216005 at</a>    | <a href="#">TNC</a>       | tenascin C                                                                                       |
| 2.95E-05  | 0.0001655 | 4.827 | <a href="#">232268 at</a>    | NA                        | NA                                                                                               |
| 7.50E-06  | 8.35E-05  | 4.825 | <a href="#">203329 at</a>    | <a href="#">PTPRM</a>     | protein tyrosine phosphatase, receptor type, M                                                   |
| 1.45E-05  | 0.0001142 | 4.823 | <a href="#">212419 at</a>    | <a href="#">ZCCHC24</a>   | zinc finger, CCHC domain containing 24                                                           |
| 6.70E-06  | 8.10E-05  | 4.810 | <a href="#">203434 s at</a>  | <a href="#">MME</a>       | membrane metallo-endopeptidase                                                                   |
| 0.000378  | 0.0008052 | 4.808 | <a href="#">241970 at</a>    | NA                        | NA                                                                                               |
| 0.0002811 | 0.0006545 | 4.807 | <a href="#">232231 at</a>    | <a href="#">RUNX2</a>     | runt-related transcription factor 2                                                              |
| 6.60E-06  | 8.10E-05  | 4.802 | <a href="#">216033 s at</a>  | <a href="#">FYN</a>       | FYN oncogene related to SRC, FGR, YES                                                            |
| 1.16E-05  | 0.0001021 | 4.727 | <a href="#">239108 at</a>    | <a href="#">FAR2</a>      | fatty acyl CoA reductase 2                                                                       |
| 5.00E-06  | 7.16E-05  | 4.723 | <a href="#">212488 at</a>    | <a href="#">COL5A1</a>    | collagen, type V, alpha 1                                                                        |
| 0.0001628 | 0.0004398 | 4.720 | <a href="#">225288 at</a>    | <a href="#">COL27A1</a>   | collagen, type XXVII, alpha 1                                                                    |
| 1.40E-06  | 5.65E-05  | 4.716 | <a href="#">201540 at</a>    | <a href="#">FHL1</a>      | four and a half LIM domains 1                                                                    |
| 0.0006946 | 0.0012675 | 4.701 | <a href="#">235342 at</a>    | <a href="#">SPOCK3</a>    | sparc/osteonectin, cwcv and kazal-like domains proteoglycan (testican) 3                         |

|           |           |       |                              |                              |                                                                                         |
|-----------|-----------|-------|------------------------------|------------------------------|-----------------------------------------------------------------------------------------|
| 8.00E-05  | 0.0002894 | 4.701 | <a href="#">209946_at</a>    | <a href="#">VEGFC</a>        | vascular endothelial growth factor C                                                    |
| 0.0005452 | 0.0010527 | 4.692 | <a href="#">212609_s_at</a>  | <a href="#">AKT3</a>         | v-akt murine thymoma viral oncogene homolog 3 (protein kinase B, gamma)                 |
| 0.0004284 | 0.0008774 | 4.686 | <a href="#">202202_s_at</a>  | <a href="#">LAMA4</a>        | laminin, alpha 4                                                                        |
| 0.0002472 | 0.0006047 | 4.665 | <a href="#">205579_at</a>    | <a href="#">HRH1</a>         | histamine receptor H1                                                                   |
| < 1e-07   | < 1e-07   | 4.646 | <a href="#">208782_at</a>    | <a href="#">FSTL1</a>        | folliculin-like 1                                                                       |
| 0.0007327 | 0.001319  | 4.622 | <a href="#">218678_at</a>    | <a href="#">NES</a>          | nestin                                                                                  |
| 0.0002754 | 0.0006435 | 4.612 | <a href="#">213429_at</a>    | <a href="#">NA</a>           | NA                                                                                      |
| 0.0001148 | 0.000358  | 4.589 | <a href="#">210299_s_at</a>  | <a href="#">FHL1</a>         | four and a half LIM domains 1                                                           |
| 0.0001067 | 0.0003393 | 4.569 | <a href="#">229307_at</a>    | <a href="#">ANKRD28</a>      | ankyrin repeat domain 28                                                                |
| 2.50E-06  | 6.21E-05  | 4.501 | <a href="#">205207_at</a>    | <a href="#">IL6</a>          | interleukin 6 (interferon, beta 2)                                                      |
| 2.20E-05  | 0.0001401 | 4.498 | <a href="#">203570_at</a>    | <a href="#">LOXL1</a>        | lysyl oxidase-like 1                                                                    |
| 0.0003879 | 0.0008195 | 4.497 | <a href="#">1552487_a_at</a> | <a href="#">BNC1</a>         | basonuclin 1                                                                            |
| 3.52E-05  | 0.0001774 | 4.486 | <a href="#">204083_s_at</a>  | <a href="#">TPM2</a>         | tropomyosin 2 (beta)                                                                    |
| 0.0005285 | 0.001031  | 4.469 | <a href="#">220615_s_at</a>  | <a href="#">FAR2</a>         | fatty acyl CoA reductase 2                                                              |
| 0.0008766 | 0.001513  | 4.415 | <a href="#">223395_at</a>    | <a href="#">ABI3BP</a>       | ABI family, member 3 (NESH) binding protein                                             |
| 7.16E-05  | 0.0002685 | 4.373 | <a href="#">225664_at</a>    | <a href="#">COL12A1</a>      | collagen, type XII, alpha 1                                                             |
| 0.0007751 | 0.0013794 | 4.319 | <a href="#">235367_at</a>    | <a href="#">MYPN</a>         | myopalladin                                                                             |
| 3.11E-05  | 0.0001676 | 4.312 | <a href="#">212843_at</a>    | <a href="#">NCAM1</a>        | neural cell adhesion molecule 1                                                         |
| 9.46E-05  | 0.0003168 | 4.291 | <a href="#">1560698_a_at</a> | <a href="#">LOC283392</a>    | hypothetical LOC283392                                                                  |
| 1.92E-05  | 0.0001292 | 4.282 | <a href="#">203910_at</a>    | <a href="#">ARHGAP29</a>     | Rho GTPase activating protein 29                                                        |
| 3.22E-05  | 0.0001702 | 4.272 | <a href="#">228438_at</a>    | <a href="#">LOC100132891</a> | hypothetical protein LOC100132891                                                       |
| 0.000413  | 0.0008551 | 4.249 | <a href="#">204236_at</a>    | <a href="#">FLI1</a>         | Friend leukemia virus integration 1                                                     |
| 1.64E-05  | 0.0001203 | 4.249 | <a href="#">220994_s_at</a>  | <a href="#">STXBP6</a>       | syntaxin binding protein 6 (amisyn)                                                     |
| 6.45E-05  | 0.0002523 | 4.242 | <a href="#">209348_s_at</a>  | <a href="#">MAF</a>          | v-maf musculoaponeurotic fibrosarcoma oncogene homolog (avian)                          |
| 0.0001553 | 0.0004308 | 4.221 | <a href="#">203963_at</a>    | <a href="#">CA12</a>         | carbonic anhydrase XII                                                                  |
| 3.90E-06  | 6.75E-05  | 4.199 | <a href="#">212489_at</a>    | <a href="#">COL5A1</a>       | collagen, type V, alpha 1                                                               |
| 0.0002471 | 0.0006047 | 4.187 | <a href="#">213603_s_at</a>  | <a href="#">RAC2</a>         | ras-related C3 botulinum toxin substrate 2 (rho family, small GTP binding protein Rac2) |
| 1.74E-05  | 0.0001233 | 4.180 | <a href="#">230418_s_at</a>  | <a href="#">GALNTL1</a>      | UDP-N-acetyl-alpha-D-galactosamine:polypeptide N-acetylgalactosaminyltransferase-like 1 |
| 0.0005247 | 0.0010272 | 4.176 | <a href="#">203980_at</a>    | <a href="#">FABP4</a>        | fatty acid binding protein 4, adipocyte                                                 |
| 0.0002122 | 0.0005366 | 4.176 | <a href="#">213397_x_at</a>  | <a href="#">ANG</a>          | angiogenin, ribonuclease, RNase A family, 5                                             |
| 5.01E-05  | 0.0002149 | 4.160 | <a href="#">219737_s_at</a>  | <a href="#">PCDH9</a>        | protocadherin 9                                                                         |
| 8.19E-05  | 0.0002949 | 4.159 | <a href="#">223723_at</a>    | <a href="#">MF12</a>         | antigen p97 (melanoma associated) identified by monoclonal antibodies 133.2 and 96.5    |
| 3.53E-05  | 0.0001774 | 4.148 | <a href="#">226932_at</a>    | <a href="#">SSPN</a>         | sarcospan (Kras oncogene-associated gene)                                               |
| 0.0005252 | 0.0010272 | 4.128 | <a href="#">225241_at</a>    | <a href="#">CCDC80</a>       | coiled-coil domain containing 80                                                        |
| 3.34E-05  | 0.0001724 | 4.122 | <a href="#">225524_at</a>    | <a href="#">ANTXR2</a>       | anthrax toxin receptor 2                                                                |
| 0.0001064 | 0.0003388 | 4.111 | <a href="#">207303_at</a>    | <a href="#">PDE1C</a>        | phosphodiesterase 1C, calmodulin-dependent 70kDa                                        |
| 0.0002519 | 0.0006096 | 4.083 | <a href="#">230883_at</a>    | <a href="#">NA</a>           | NA                                                                                      |
| 5.30E-05  | 0.0002223 | 4.079 | <a href="#">212423_at</a>    | <a href="#">ZCCHC24</a>      | zinc finger, CCHC domain containing 24                                                  |
| 0.0001031 | 0.0003321 | 4.066 | <a href="#">1562415_a_at</a> | <a href="#">SPOCD1</a>       | SPOC domain containing 1                                                                |
| 8.37E-05  | 0.0002992 | 4.014 | <a href="#">224964_s_at</a>  | <a href="#">GNG2</a>         | guanine nucleotide binding protein (G protein), gamma 2                                 |
| 1.09E-05  | 9.98E-05  | 3.978 | <a href="#">205019_s_at</a>  | <a href="#">VIPR1</a>        | vasoactive intestinal peptide receptor 1                                                |
| 2.61E-05  | 0.0001529 | 3.973 | <a href="#">219702_at</a>    | <a href="#">PLAC1</a>        | placenta-specific 1                                                                     |
| 9.00E-07  | 5.36E-05  | 3.964 | <a href="#">209357_at</a>    | <a href="#">CITED2</a>       | Cbp/p300-interacting transactivator, with Glu/Asp-rich carboxy-terminal domain, 2       |

|           |           |       |                              |                              |                                                                                                 |
|-----------|-----------|-------|------------------------------|------------------------------|-------------------------------------------------------------------------------------------------|
| 2.00E-06  | 5.72E-05  | 3.964 | <a href="#">226066 at</a>    | <a href="#">MITF</a>         | microphthalmia-associated transcription factor                                                  |
| 1.82E-05  | 0.0001274 | 3.963 | <a href="#">226614 s at</a>  | <a href="#">FAM167A</a>      | family with sequence similarity 167, member A                                                   |
| 0.0002766 | 0.0006454 | 3.948 | <a href="#">230968 at</a>    | NA                           | NA                                                                                              |
| 4.00E-06  | 6.75E-05  | 3.930 | <a href="#">218717 s at</a>  | <a href="#">LEPREL1</a>      | leprecan-like 1                                                                                 |
| 0.0009165 | 0.0015651 | 3.917 | <a href="#">220407 s at</a>  | <a href="#">TGFB2</a>        | transforming growth factor, beta 2                                                              |
| 9.23E-05  | 0.0003122 | 3.912 | <a href="#">206363 at</a>    | <a href="#">MAF</a>          | v-maf musculoaponeurotic fibrosarcoma oncogene homolog (avian)                                  |
| 0.000116  | 0.0003595 | 3.910 | <a href="#">229273 at</a>    | <a href="#">SALL1</a>        | sal-like 1 (Drosophila)                                                                         |
| 6.29E-05  | 0.0002469 | 3.902 | <a href="#">207876 s at</a>  | <a href="#">FLNC</a>         | filamin C, gamma (actin binding protein 280)                                                    |
| 4.43E-05  | 0.000196  | 3.879 | <a href="#">230425 at</a>    | <a href="#">EPHB1</a>        | EPH receptor B1                                                                                 |
| 6.58E-05  | 0.0002561 | 3.823 | <a href="#">236656 s at</a>  | <a href="#">LOC100130506</a> | hypothetical protein LOC100130506                                                               |
| 2.00E-05  | 0.0001322 | 3.816 | <a href="#">202686 s at</a>  | <a href="#">AXL</a>          | AXL receptor tyrosine kinase                                                                    |
| 1.86E-05  | 0.0001286 | 3.800 | <a href="#">1556138 a at</a> | NA                           | NA                                                                                              |
| 9.48E-05  | 0.0003168 | 3.793 | <a href="#">1555724 s at</a> | <a href="#">TAGLN</a>        | transgelin                                                                                      |
| 0.0008734 | 0.0015086 | 3.768 | <a href="#">223618 at</a>    | <a href="#">FMN2</a>         | formin 2                                                                                        |
| 3.55E-05  | 0.0001776 | 3.754 | <a href="#">230183 at</a>    | <a href="#">EXT1</a>         | exostoses (multiple) 1                                                                          |
| 0.0008325 | 0.0014547 | 3.749 | <a href="#">225381 at</a>    | <a href="#">LOC399959</a>    | hypothetical gene supported by BX647608                                                         |
| 0.0002584 | 0.0006182 | 3.744 | <a href="#">1556499 s at</a> | <a href="#">COL1A1</a>       | collagen, type I, alpha 1                                                                       |
| 0.0005686 | 0.001084  | 3.737 | <a href="#">226358 at</a>    | NA                           | NA                                                                                              |
| 0.0001539 | 0.0004291 | 3.732 | <a href="#">206290 s at</a>  | <a href="#">RGS7</a>         | regulator of G-protein signaling 7                                                              |
| 0.000193  | 0.0004999 | 3.729 | <a href="#">215867 x at</a>  | <a href="#">CA12</a>         | carbonic anhydrase XII                                                                          |
| 3.60E-06  | 6.75E-05  | 3.725 | <a href="#">201041 s at</a>  | <a href="#">DUSP1</a>        | dual specificity phosphatase 1                                                                  |
| 3.90E-06  | 6.75E-05  | 3.724 | <a href="#">211071 s at</a>  | <a href="#">MLLT11</a>       | myeloid/lymphoid or mixed-lineage leukemia (trithorax homolog, Drosophila); translocated to, 11 |
| 2.40E-06  | 6.21E-05  | 3.716 | <a href="#">226905 at</a>    | <a href="#">FAM101B</a>      | family with sequence similarity 101, member B                                                   |
| 1.19E-05  | 0.0001035 | 3.714 | <a href="#">218820 at</a>    | <a href="#">C14orf132</a>    | chromosome 14 open reading frame 132                                                            |
| 9.70E-06  | 9.41E-05  | 3.707 | <a href="#">219295 s at</a>  | <a href="#">PCOLCE2</a>      | procollagen C-endopeptidase enhancer 2                                                          |
| 3.00E-07  | 3.57E-05  | 3.707 | <a href="#">209949 at</a>    | <a href="#">NCF2</a>         | neutrophil cytosolic factor 2                                                                   |
| 6.75E-05  | 0.0002591 | 3.702 | <a href="#">204748 at</a>    | <a href="#">PTGS2</a>        | prostaglandin-endoperoxide synthase 2 (prostaglandin G/H synthase and cyclooxygenase)           |
| 2.28E-05  | 0.0001416 | 3.700 | <a href="#">226633 at</a>    | <a href="#">RAB8B</a>        | RAB8B, member RAS oncogene family                                                               |
| 2.96E-05  | 0.0001657 | 3.698 | <a href="#">228121 at</a>    | <a href="#">TGFB2</a>        | transforming growth factor, beta 2                                                              |
| 0.0008303 | 0.001453  | 3.697 | <a href="#">202765 s at</a>  | <a href="#">FBN1</a>         | fibrillin 1                                                                                     |
| 7.51E-05  | 0.000277  | 3.696 | <a href="#">221031 s at</a>  | <a href="#">APOLD1</a>       | apolipoprotein L domain containing 1                                                            |
| 2.49E-05  | 0.0001493 | 3.692 | <a href="#">225975 at</a>    | <a href="#">PCDH18</a>       | protocadherin 18                                                                                |
| 1.61E-05  | 0.0001197 | 3.678 | <a href="#">225989 at</a>    | <a href="#">HERC4</a>        | hect domain and RLD 4                                                                           |
| 7.50E-06  | 8.35E-05  | 3.671 | <a href="#">224925 at</a>    | <a href="#">PREX1</a>        | phosphatidylinositol-3,4,5-trisphosphate-dependent Rac exchange factor 1                        |
| 4.62E-05  | 0.000202  | 3.663 | <a href="#">229092 at</a>    | <a href="#">NR2F2</a>        | nuclear receptor subfamily 2, group F, member 2                                                 |
| 0.000909  | 0.0015558 | 3.661 | <a href="#">203153 at</a>    | <a href="#">IFIT1</a>        | interferon-induced protein with tetratricopeptide repeats 1                                     |
| 1.38E-05  | 0.000111  | 3.652 | <a href="#">219304 s at</a>  | <a href="#">PDGFD</a>        | platelet derived growth factor D                                                                |
| 0.000156  | 0.0004313 | 3.642 | <a href="#">1558692 at</a>   | <a href="#">C1orf85</a>      | chromosome 1 open reading frame 85                                                              |
| 0.0006406 | 0.0011843 | 3.623 | <a href="#">231067 s at</a>  | NA                           | NA                                                                                              |
| 0.0002714 | 0.0006379 | 3.623 | <a href="#">221016 s at</a>  | <a href="#">TCF7L1</a>       | transcription factor 7-like 1 (T-cell specific, HMG-box)                                        |
| 0.0001595 | 0.0004361 | 3.606 | <a href="#">227646 at</a>    | <a href="#">EBF1</a>         | early B-cell factor 1                                                                           |
| 4.80E-06  | 7.05E-05  | 3.599 | <a href="#">204417 at</a>    | <a href="#">GALC</a>         | galactosylceramidase                                                                            |
| 0.0003917 | 0.0008246 | 3.585 | <a href="#">227140 at</a>    | NA                           | NA                                                                                              |

|           |           |       |                             |                          |                                                                                        |
|-----------|-----------|-------|-----------------------------|--------------------------|----------------------------------------------------------------------------------------|
| 6.60E-05  | 0.0002563 | 3.581 | <a href="#">203665 at</a>   | <a href="#">HMOX1</a>    | heme oxygenase (decycling) 1                                                           |
| 0.0003573 | 0.000773  | 3.566 | <a href="#">239227 at</a>   | NA                       | NA                                                                                     |
| 0.0006936 | 0.0012667 | 3.553 | <a href="#">202936 s at</a> | <a href="#">SOX9</a>     | SRY (sex determining region Y)-box 9                                                   |
| 1.47E-05  | 0.000115  | 3.541 | <a href="#">223218 s at</a> | <a href="#">NFKBIZ</a>   | nuclear factor of kappa light polypeptide gene enhancer in B-cells inhibitor, zeta     |
| 0.0001023 | 0.0003309 | 3.538 | <a href="#">203423 at</a>   | <a href="#">RBP1</a>     | retinol binding protein 1, cellular                                                    |
| 1.80E-06  | 5.65E-05  | 3.533 | <a href="#">227386 s at</a> | <a href="#">TMEM200B</a> | transmembrane protein 200B                                                             |
| 4.00E-07  | 3.77E-05  | 3.501 | <a href="#">210095 s at</a> | <a href="#">IGFBP3</a>   | insulin-like growth factor binding protein 3                                           |
| 0.0003795 | 0.0008063 | 3.501 | <a href="#">202310 s at</a> | <a href="#">COL1A1</a>   | collagen, type I, alpha 1                                                              |
| 0.00061   | 0.0011432 | 3.501 | <a href="#">219855 at</a>   | <a href="#">NUDT11</a>   | nudix (nucleoside diphosphate linked moiety X)-type motif 11                           |
| 3.23E-05  | 0.0001702 | 3.454 | <a href="#">203325 s at</a> | <a href="#">COL5A1</a>   | collagen, type V, alpha 1                                                              |
| 7.72E-05  | 0.0002824 | 3.454 | <a href="#">204529 s at</a> | <a href="#">TOX</a>      | thymocyte selection-associated high mobility group box                                 |
| 0.0001847 | 0.0004847 | 3.441 | <a href="#">206375 s at</a> | <a href="#">HSPB3</a>    | heat shock 27kDa protein 3                                                             |
| 1.43E-05  | 0.000113  | 3.425 | <a href="#">202037 s at</a> | <a href="#">SFRP1</a>    | secreted frizzled-related protein 1                                                    |
| 2.20E-06  | 5.78E-05  | 3.417 | <a href="#">214612 x at</a> | <a href="#">MAGEA6</a>   | melanoma antigen family A, 6                                                           |
| 1.80E-06  | 5.65E-05  | 3.407 | <a href="#">225681 at</a>   | <a href="#">CTHRC1</a>   | collagen triple helix repeat containing 1                                              |
| 0.0001544 | 0.0004297 | 3.402 | <a href="#">202859 x at</a> | <a href="#">IL8</a>      | interleukin 8                                                                          |
| 1.77E-05  | 0.0001251 | 3.396 | <a href="#">206117 at</a>   | <a href="#">TPM1</a>     | tropomyosin 1 (alpha)                                                                  |
| 1.42E-05  | 0.000113  | 3.394 | <a href="#">229019 at</a>   | <a href="#">ZNF385B</a>  | zinc finger protein 385B                                                               |
| 4.20E-06  | 6.83E-05  | 3.384 | <a href="#">202252 at</a>   | <a href="#">RAB13</a>    | RAB13, member RAS oncogene family                                                      |
| 3.30E-06  | 6.60E-05  | 3.381 | <a href="#">204984 at</a>   | <a href="#">GPC4</a>     | glypican 4                                                                             |
| 0.0001057 | 0.0003374 | 3.374 | <a href="#">44702 at</a>    | <a href="#">SYDE1</a>    | synapse defective 1, Rho GTPase, homolog 1 (C. elegans)                                |
| 7.84E-05  | 0.0002845 | 3.372 | <a href="#">204963 at</a>   | <a href="#">SSPN</a>     | sarcospan (Kras oncogene-associated gene)                                              |
| 0.0006748 | 0.0012361 | 3.372 | <a href="#">204422 s at</a> | <a href="#">FGF2</a>     | fibroblast growth factor 2 (basic)                                                     |
| 0.0004995 | 0.0009907 | 3.368 | <a href="#">203821 at</a>   | <a href="#">HBEGF</a>    | heparin-binding EGF-like growth factor                                                 |
| 0.000548  | 0.0010572 | 3.357 | <a href="#">230130 at</a>   | NA                       | NA                                                                                     |
| 9.30E-06  | 9.40E-05  | 3.356 | <a href="#">201069 at</a>   | <a href="#">MMP2</a>     | matrix metalloproteinase 2 (gelatinase A, 72kDa gelatinase, 72kDa type IV collagenase) |
| 8.43E-05  | 0.0002992 | 3.351 | <a href="#">235548 at</a>   | <a href="#">APCDD1L</a>  | adenomatosis polyposis coli down-regulated 1-like                                      |
| 0.0002841 | 0.0006593 | 3.347 | <a href="#">233002 at</a>   | <a href="#">PPP4R4</a>   | protein phosphatase 4, regulatory subunit 4                                            |
| 8.31E-05  | 0.0002982 | 3.334 | <a href="#">228007 at</a>   | <a href="#">C6orf204</a> | chromosome 6 open reading frame 204                                                    |
| 0.0005206 | 0.0010218 | 3.329 | <a href="#">213712 at</a>   | <a href="#">ELOVL2</a>   | elongation of very long chain fatty acids (FEN1/Elo2, SUR4/Elo3, yeast)-like 2         |
| 0.0001325 | 0.0003881 | 3.318 | <a href="#">236115 at</a>   | NA                       | NA                                                                                     |
| 6.96E-05  | 0.0002627 | 3.317 | <a href="#">221530 s at</a> | <a href="#">BHLHE41</a>  | basic helix-loop-helix family, member e41                                              |
| 0.0001048 | 0.0003356 | 3.295 | <a href="#">208998 at</a>   | <a href="#">UCP2</a>     | uncoupling protein 2 (mitochondrial, proton carrier)                                   |
| 0.0001565 | 0.0004313 | 3.292 | <a href="#">206825 at</a>   | <a href="#">OXTR</a>     | oxytocin receptor                                                                      |
| 2.90E-06  | 6.30E-05  | 3.289 | <a href="#">209942 x at</a> | <a href="#">MAGEA3</a>   | melanoma antigen family A, 3                                                           |
| 0.0009593 | 0.0016209 | 3.281 | <a href="#">202158 s at</a> | <a href="#">CUGBP2</a>   | CUG triplet repeat, RNA binding protein 2                                              |
| 0.0001201 | 0.0003667 | 3.279 | <a href="#">209598 at</a>   | <a href="#">PNMA2</a>    | paraneoplastic antigen MA2                                                             |
| 7.16E-05  | 0.0002685 | 3.277 | <a href="#">203729 at</a>   | <a href="#">EMP3</a>     | epithelial membrane protein 3                                                          |
| 0.000628  | 0.0011667 | 3.270 | <a href="#">224909 s at</a> | <a href="#">PREX1</a>    | phosphatidylinositol-3,4,5-trisphosphate-dependent Rac exchange factor 1               |
| 2.36E-05  | 0.0001452 | 3.269 | <a href="#">228171 s at</a> | <a href="#">PLEKHG4</a>  | pleckstrin homology domain containing, family G (with RhoGef domain) member 4          |
| 2.60E-06  | 6.21E-05  | 3.267 | <a href="#">226342 at</a>   | <a href="#">SPTBN1</a>   | spectrin, beta, non-erythrocytic 1                                                     |
| 2.70E-06  | 6.21E-05  | 3.259 | <a href="#">215388 s at</a> | <a href="#">CFHR1</a>    | complement factor H-related 1                                                          |
| 4.02E-05  | 0.0001895 | 3.256 | <a href="#">214930 at</a>   | <a href="#">SLITRK5</a>  | SLIT and NTRK-like family, member 5                                                    |



|           |           |       |                             |                              |                                                                                                |
|-----------|-----------|-------|-----------------------------|------------------------------|------------------------------------------------------------------------------------------------|
| 1.38E-05  | 0.000111  | 3.200 | <a href="#">213438 at</a>   | <a href="#">NFASC</a>        | neurofascin homolog (chicken)                                                                  |
| 9.08E-05  | 0.0003101 | 3.199 | <a href="#">212143 s at</a> | <a href="#">IGFBP3</a>       | insulin-like growth factor binding protein 3                                                   |
| 3.06E-05  | 0.0001676 | 3.193 | <a href="#">231175 at</a>   | <a href="#">BEND6</a>        | BEN domain containing 6                                                                        |
| 8.80E-05  | 0.0003056 | 3.193 | <a href="#">201508 at</a>   | <a href="#">IGFBP4</a>       | insulin-like growth factor binding protein 4                                                   |
| 2.44E-05  | 0.0001487 | 3.185 | <a href="#">232080 at</a>   | <a href="#">HECW2</a>        | HECT, C2 and WW domain containing E3 ubiquitin protein ligase 2                                |
| 0.0009599 | 0.0016209 | 3.184 | <a href="#">207980 s at</a> | <a href="#">CITED2</a>       | Cbp/p300-interacting transactivator, with Glu/Asp-rich carboxy-terminal domain, 2              |
| 0.0005053 | 0.0009995 | 3.182 | <a href="#">229065 at</a>   | <a href="#">SLC35F3</a>      | solute carrier family 35, member F3                                                            |
| 0.0003002 | 0.0006877 | 3.165 | <a href="#">213262 at</a>   | <a href="#">SACS</a>         | spastic ataxia of Charlevoix-Saguenay (sacsin)                                                 |
| 7.29E-05  | 0.0002715 | 3.160 | <a href="#">229256 at</a>   | <a href="#">PGM2L1</a>       | phosphoglucomutase 2-like 1                                                                    |
| 2.80E-06  | 6.21E-05  | 3.159 | <a href="#">229354 at</a>   | <a href="#">AHRR</a>         | aryl-hydrocarbon receptor repressor                                                            |
| 0.0008507 | 0.0014793 | 3.156 | <a href="#">239519 at</a>   | <a href="#">NA</a>           | NA                                                                                             |
| 0.0008184 | 0.0014355 | 3.144 | <a href="#">202935 s at</a> | <a href="#">SOX9</a>         | SRY (sex determining region Y)-box 9                                                           |
| 0.0001215 | 0.0003678 | 3.144 | <a href="#">218720 x at</a> | <a href="#">SEZ6L2</a>       | seizure related 6 homolog (mouse)-like 2                                                       |
| 7.64E-05  | 0.0002808 | 3.132 | <a href="#">214913 at</a>   | <a href="#">ADAMTS3</a>      | ADAM metalloproteinase with thrombospondin type 1 motif, 3                                     |
| 1.00E-06  | 5.51E-05  | 3.130 | <a href="#">212771 at</a>   | <a href="#">FAM171A1</a>     | family with sequence similarity 171, member A1                                                 |
| 0.0009635 | 0.0016233 | 3.124 | <a href="#">223622 s at</a> | <a href="#">HYI</a>          | hydroxypyruvate isomerase homolog (E. coli)                                                    |
| 3.90E-06  | 6.75E-05  | 3.112 | <a href="#">227279 at</a>   | <a href="#">TCEAL3</a>       | transcription elongation factor A (SII)-like 3                                                 |
| 0.0005303 | 0.0010327 | 3.110 | <a href="#">226875 at</a>   | <a href="#">DOCK11</a>       | dedicator of cytokinesis 11                                                                    |
| 0.0001249 | 0.0003721 | 3.107 | <a href="#">206243 at</a>   | <a href="#">TIMP4</a>        | TIMP metalloproteinase inhibitor 4                                                             |
| 8.57E-05  | 0.0003017 | 3.107 | <a href="#">228724 at</a>   | <a href="#">NA</a>           | NA                                                                                             |
| 3.10E-05  | 0.0001676 | 3.100 | <a href="#">227713 at</a>   | <a href="#">KATNAL1</a>      | katanin p60 subunit A-like 1                                                                   |
| 0.0001845 | 0.0004847 | 3.070 | <a href="#">229948 at</a>   | <a href="#">NA</a>           | NA                                                                                             |
| 0.0004648 | 0.0009308 | 3.067 | <a href="#">205381 at</a>   | <a href="#">LRRC17</a>       | leucine rich repeat containing 17                                                              |
| 6.30E-06  | 7.96E-05  | 3.060 | <a href="#">205583 s at</a> | <a href="#">ALG13</a>        | asparagine-linked glycosylation 13 homolog (S. cerevisiae)                                     |
| 0.000492  | 0.0009784 | 3.051 | <a href="#">213158 at</a>   | <a href="#">NA</a>           | NA                                                                                             |
| 0.0003206 | 0.0007174 | 3.045 | <a href="#">232174 at</a>   | <a href="#">NA</a>           | NA                                                                                             |
| 0.0001926 | 0.0004994 | 3.042 | <a href="#">237116 at</a>   | <a href="#">LOC646903</a>    | hypothetical LOC646903                                                                         |
| 0.0002163 | 0.0005446 | 3.041 | <a href="#">215206 at</a>   | <a href="#">NA</a>           | NA                                                                                             |
| 0.0007379 | 0.0013262 | 3.035 | <a href="#">209156 s at</a> | <a href="#">COL6A2</a>       | collagen, type VI, alpha 2                                                                     |
| 0.0007052 | 0.0012812 | 3.029 | <a href="#">236129 at</a>   | <a href="#">GALNT5</a>       | UDP-N-acetyl-alpha-D-galactosamine:polypeptide N-acetylgalactosaminyltransferase 5 (GalNAc-T5) |
| 0.0003029 | 0.0006911 | 3.024 | <a href="#">206170 at</a>   | <a href="#">ADR2</a>         | adrenergic, beta-2-, receptor, surface                                                         |
| 8.06E-05  | 0.0002911 | 3.012 | <a href="#">228783 at</a>   | <a href="#">BVES</a>         | blood vessel epicardial substance                                                              |
| 0.000328  | 0.0007261 | 3.002 | <a href="#">212298 at</a>   | <a href="#">NRP1</a>         | neuropilin 1                                                                                   |
| 4.29E-05  | 0.0001945 | 3.000 | <a href="#">225782 at</a>   | <a href="#">MSRB3</a>        | methionine sulfoxide reductase B3                                                              |
| 0.0001588 | 0.0004347 | 2.996 | <a href="#">218723 s at</a> | <a href="#">C13orf15</a>     | chromosome 13 open reading frame 15                                                            |
| 1.53E-05  | 0.0001177 | 2.994 | <a href="#">241353 s at</a> | <a href="#">LOC100129105</a> | similar to hCG1821214                                                                          |
| 0.0002209 | 0.000553  | 2.993 | <a href="#">219410 at</a>   | <a href="#">TMEM45A</a>      | transmembrane protein 45A                                                                      |
| 2.50E-06  | 6.21E-05  | 2.992 | <a href="#">219170 at</a>   | <a href="#">FSD1</a>         | fibronectin type III and SPRY domain containing 1                                              |
| 0.0003508 | 0.0007634 | 2.985 | <a href="#">1553708 at</a>  | <a href="#">MGC16075</a>     | hypothetical protein MGC16075                                                                  |
| 1.70E-06  | 5.65E-05  | 2.984 | <a href="#">204872 at</a>   | <a href="#">TLE4</a>         | transducin-like enhancer of split 4 (E(sp1) homolog, Drosophila)                               |
| 0.000227  | 0.000564  | 2.978 | <a href="#">231726 at</a>   | <a href="#">PCDHB14</a>      | protocadherin beta 14                                                                          |
| 0.00025   | 0.0006074 | 2.976 | <a href="#">213428 s at</a> | <a href="#">COL6A1</a>       | collagen, type VI, alpha 1                                                                     |
| 0.0004105 | 0.0008523 | 2.974 | <a href="#">223082 at</a>   | <a href="#">SH3KBP1</a>      | SH3-domain kinase binding protein 1                                                            |



|           |           |       |                             |                          |                                                                                               |
|-----------|-----------|-------|-----------------------------|--------------------------|-----------------------------------------------------------------------------------------------|
| 0.0001389 | 0.0003996 | 2.972 | <a href="#">205637 s at</a> | <a href="#">SH3GL3</a>   | SH3-domain GRB2-like 3                                                                        |
| 4.41E-05  | 0.000196  | 2.966 | <a href="#">227272 at</a>   | <a href="#">C15orf52</a> | chromosome 15 open reading frame 52                                                           |
| 0.0002518 | 0.0006096 | 2.954 | <a href="#">225185 at</a>   | <a href="#">MRAS</a>     | muscle RAS oncogene homolog                                                                   |
| 2.58E-05  | 0.0001527 | 2.946 | <a href="#">224002 s at</a> | <a href="#">FKBP7</a>    | FK506 binding protein 7                                                                       |
| 0.0003276 | 0.0007261 | 2.946 | <a href="#">221870 at</a>   | <a href="#">EHD2</a>     | EH-domain containing 2                                                                        |
| 0.0006227 | 0.0011597 | 2.940 | <a href="#">231766 s at</a> | <a href="#">COL12A1</a>  | collagen, type XII, alpha 1                                                                   |
| 0.0001579 | 0.0004327 | 2.940 | <a href="#">202796 at</a>   | <a href="#">SYNPO</a>    | synaptopodin                                                                                  |
| 9.73E-05  | 0.0003215 | 2.933 | <a href="#">223960 s at</a> | <a href="#">C16orf5</a>  | chromosome 16 open reading frame 5                                                            |
| 0.0001609 | 0.0004378 | 2.928 | <a href="#">230706 s at</a> | <a href="#">CAMK2N2</a>  | calcium/calmodulin-dependent protein kinase II inhibitor 2                                    |
| 0.0001599 | 0.0004361 | 2.922 | <a href="#">212190 at</a>   | <a href="#">SERPINE2</a> | serpin peptidase inhibitor, clade E (nexin, plasminogen activator inhibitor type 1), member 2 |
| 6.10E-06  | 7.93E-05  | 2.918 | <a href="#">226771 at</a>   | <a href="#">ATP8B2</a>   | ATPase, class I, type 8B, member 2                                                            |
| 0.0005734 | 0.0010904 | 2.916 | <a href="#">228843 at</a>   | NA                       | NA                                                                                            |
| 0.000287  | 0.0006649 | 2.913 | <a href="#">235171 at</a>   | NA                       | NA                                                                                            |
| 0.0005142 | 0.0010127 | 2.913 | <a href="#">226311 at</a>   | NA                       | NA                                                                                            |
| 7.26E-05  | 0.0002709 | 2.911 | <a href="#">210102 at</a>   | <a href="#">VWA5A</a>    | von Willebrand factor A domain containing 5A                                                  |
| 0.0003256 | 0.0007239 | 2.909 | <a href="#">204774 at</a>   | <a href="#">EVI2A</a>    | ecotropic viral integration site 2A                                                           |
| 0.0001289 | 0.0003813 | 2.908 | <a href="#">45297 at</a>    | <a href="#">EHD2</a>     | EH-domain containing 2                                                                        |
| 1.30E-06  | 5.65E-05  | 2.907 | <a href="#">202664 at</a>   | <a href="#">WIPF1</a>    | WAS/WASL interacting protein family, member 1                                                 |
| 0.0001712 | 0.0004565 | 2.899 | <a href="#">219578 s at</a> | <a href="#">CPEB1</a>    | cytoplasmic polyadenylation element binding protein 1                                         |
| 0.0001205 | 0.0003667 | 2.886 | <a href="#">200632 s at</a> | <a href="#">NDRG1</a>    | N-myc downstream regulated 1                                                                  |
| 0.000133  | 0.000389  | 2.885 | <a href="#">228573 at</a>   | NA                       | NA                                                                                            |
| 0.0009223 | 0.0015733 | 2.877 | <a href="#">209604 s at</a> | <a href="#">GATA3</a>    | GATA binding protein 3                                                                        |
| 0.0002884 | 0.0006661 | 2.877 | <a href="#">202422 s at</a> | <a href="#">ACSL4</a>    | acyl-CoA synthetase long-chain family member 4                                                |
| 4.40E-06  | 6.91E-05  | 2.862 | <a href="#">218651 s at</a> | <a href="#">LARP6</a>    | La ribonucleoprotein domain family, member 6                                                  |
| 7.82E-05  | 0.0002843 | 2.860 | <a href="#">218376 s at</a> | <a href="#">MICAL1</a>   | microtubule associated monooxygenase, calponin and LIM domain containing 1                    |
| 4.40E-06  | 6.91E-05  | 2.845 | <a href="#">201995 at</a>   | <a href="#">EXT1</a>     | exostoses (multiple) 1                                                                        |
| 1.55E-05  | 0.000118  | 2.845 | <a href="#">201482 at</a>   | <a href="#">QSOX1</a>    | quiescin Q6 sulfhydryl oxidase 1                                                              |
| 3.10E-05  | 0.0001676 | 2.841 | <a href="#">226018 at</a>   | <a href="#">C7orf41</a>  | chromosome 7 open reading frame 41                                                            |
| 0.0003583 | 0.000773  | 2.838 | <a href="#">225045 at</a>   | <a href="#">CCDC88A</a>  | coiled-coil domain containing 88A                                                             |
| 1.29E-05  | 0.0001084 | 2.834 | <a href="#">224967 at</a>   | <a href="#">UGCG</a>     | UDP-glucose ceramide glucosyltransferase                                                      |
| 0.0003569 | 0.000773  | 2.830 | <a href="#">212154 at</a>   | <a href="#">SDC2</a>     | syndecan 2                                                                                    |
| 6.88E-05  | 0.0002609 | 2.830 | <a href="#">221276 s at</a> | <a href="#">SYNC</a>     | syncoilin, intermediate filament protein                                                      |
| 3.30E-06  | 6.60E-05  | 2.829 | <a href="#">225988 at</a>   | <a href="#">HERC4</a>    | hect domain and RLD 4                                                                         |
| 5.17E-05  | 0.0002193 | 2.828 | <a href="#">227290 at</a>   | NA                       | NA                                                                                            |
| 0.000152  | 0.0004253 | 2.825 | <a href="#">226876 at</a>   | <a href="#">FAM101B</a>  | family with sequence similarity 101, member B                                                 |
| 0.0009268 | 0.0015779 | 2.818 | <a href="#">224833 at</a>   | <a href="#">ETS1</a>     | v-ets erythroblastosis virus E26 oncogene homolog 1 (avian)                                   |
| 0.0002521 | 0.0006096 | 2.815 | <a href="#">239153 at</a>   | <a href="#">HOTAIR</a>   | hox transcript antisense RNA (non-protein coding)                                             |
| 9.97E-05  | 0.0003262 | 2.810 | <a href="#">212414 s at</a> | <a href="#">6-Sep</a>    | septin 6                                                                                      |
| 5.63E-05  | 0.000231  | 2.809 | <a href="#">209883 at</a>   | <a href="#">GLT25D2</a>  | glycosyltransferase 25 domain containing 2                                                    |
| 0.0004256 | 0.0008732 | 2.794 | <a href="#">225102 at</a>   | <a href="#">MGLL</a>     | monoglyceride lipase                                                                          |
| 0.0006108 | 0.0011432 | 2.793 | <a href="#">201311 s at</a> | <a href="#">SH3BGRL</a>  | SH3 domain binding glutamic acid-rich protein like                                            |
| 3.61E-05  | 0.0001786 | 2.783 | <a href="#">224352 s at</a> | <a href="#">CFL2</a>     | cofilin 2 (muscle)                                                                            |
| 2.22E-05  | 0.000141  | 2.781 | <a href="#">226152 at</a>   | <a href="#">TTC7B</a>    | tetratricopeptide repeat domain 7B                                                            |

|           |           |       |                             |                          |                                                                                                |
|-----------|-----------|-------|-----------------------------|--------------------------|------------------------------------------------------------------------------------------------|
| 7.48E-05  | 0.0002763 | 2.777 | <a href="#">225575_at</a>   | <a href="#">LIFR</a>     | leukemia inhibitory factor receptor alpha                                                      |
| 0.0001371 | 0.0003974 | 2.774 | <a href="#">226462_at</a>   | <a href="#">STXBP6</a>   | syntaxin binding protein 6 (amysyn)                                                            |
| 2.55E-05  | 0.0001517 | 2.771 | <a href="#">219279_at</a>   | <a href="#">DOCK10</a>   | dedicator of cytokinesis 10                                                                    |
| 0.0006505 | 0.0011987 | 2.771 | <a href="#">215069_at</a>   | <a href="#">NMT2</a>     | N-myristoyltransferase 2                                                                       |
| 1.37E-05  | 0.000111  | 2.771 | <a href="#">238575_at</a>   | <a href="#">OSBPL6</a>   | oxysterol binding protein-like 6                                                               |
| 0.0002492 | 0.0006074 | 2.769 | <a href="#">219747_at</a>   | <a href="#">C4orf31</a>  | chromosome 4 open reading frame 31                                                             |
| 0.000659  | 0.0012134 | 2.767 | <a href="#">241435_at</a>   | <a href="#">NA</a>       | NA                                                                                             |
| 0.0002566 | 0.0006159 | 2.765 | <a href="#">1552972_at</a>  | <a href="#">NA</a>       | NA                                                                                             |
| 0.0003076 | 0.0006973 | 2.765 | <a href="#">242100_at</a>   | <a href="#">CHSY3</a>    | chondroitin sulfate synthase 3                                                                 |
| 0.0006432 | 0.0011881 | 2.763 | <a href="#">242876_at</a>   | <a href="#">AKT3</a>     | v-akt murine thymoma viral oncogene homolog 3 (protein kinase B, gamma)                        |
| 0.0001644 | 0.0004409 | 2.760 | <a href="#">212736_at</a>   | <a href="#">C16orf45</a> | chromosome 16 open reading frame 45                                                            |
| 0.0002693 | 0.0006343 | 2.757 | <a href="#">227839_at</a>   | <a href="#">MBD5</a>     | methyl-CpG binding domain protein 5                                                            |
| 0.0008023 | 0.0014117 | 2.755 | <a href="#">203921_at</a>   | <a href="#">CHST2</a>    | carbohydrate (N-acetylglucosamine-6-O) sulfotransferase 2                                      |
| 1.01E-05  | 9.64E-05  | 2.753 | <a href="#">212651_at</a>   | <a href="#">RHOBTB1</a>  | Rho-related BTB domain containing 1                                                            |
| 4.09E-05  | 0.0001895 | 2.747 | <a href="#">219785_s_at</a> | <a href="#">FBXO31</a>   | F-box protein 31                                                                               |
| 0.0008678 | 0.0015012 | 2.744 | <a href="#">228128_x_at</a> | <a href="#">PAPPA</a>    | pregnancy-associated plasma protein A, pappalysin 1                                            |
| 0.0001039 | 0.0003332 | 2.741 | <a href="#">223315_at</a>   | <a href="#">NTN4</a>     | netrin 4                                                                                       |
| 8.80E-06  | 9.21E-05  | 2.741 | <a href="#">224558_s_at</a> | <a href="#">MALAT1</a>   | metastasis associated lung adenocarcinoma transcript 1 (non-protein coding)                    |
| 1.15E-05  | 0.0001021 | 2.741 | <a href="#">213268_at</a>   | <a href="#">CAMTA1</a>   | calmodulin binding transcription activator 1                                                   |
| 0.0002741 | 0.0006422 | 2.736 | <a href="#">223393_s_at</a> | <a href="#">TSHZ3</a>    | teashirt zinc finger homeobox 3                                                                |
| 0.0001161 | 0.0003595 | 2.735 | <a href="#">209633_at</a>   | <a href="#">PPP2R3A</a>  | protein phosphatase 2 (formerly 2A), regulatory subunit B@#%&@#%&, alpha                       |
| 1.59E-05  | 0.000119  | 2.730 | <a href="#">213029_at</a>   | <a href="#">NFIB</a>     | nuclear factor I/B                                                                             |
| 0.0004045 | 0.0008445 | 2.719 | <a href="#">204602_at</a>   | <a href="#">DKK1</a>     | dickkopf homolog 1 (Xenopus laevis)                                                            |
| 0.0002551 | 0.0006136 | 2.713 | <a href="#">209708_at</a>   | <a href="#">MOXD1</a>    | monoxygenase, DBH-like 1                                                                       |
| 1.89E-05  | 0.0001291 | 2.708 | <a href="#">225401_at</a>   | <a href="#">C1orf85</a>  | chromosome 1 open reading frame 85                                                             |
| 6.64E-05  | 0.0002566 | 2.699 | <a href="#">204337_at</a>   | <a href="#">RGS4</a>     | regulator of G-protein signaling 4                                                             |
| 6.08E-05  | 0.0002416 | 2.699 | <a href="#">206706_at</a>   | <a href="#">NTF3</a>     | neurotrophin 3                                                                                 |
| 4.30E-06  | 6.90E-05  | 2.690 | <a href="#">203650_at</a>   | <a href="#">PROCR</a>    | protein C receptor, endothelial (EPCR)                                                         |
| 0.0009615 | 0.0016211 | 2.680 | <a href="#">229435_at</a>   | <a href="#">GLIS3</a>    | GLIS family zinc finger 3                                                                      |
| 0.0005281 | 0.001031  | 2.679 | <a href="#">222453_at</a>   | <a href="#">CYBRD1</a>   | cytochrome b reductase 1                                                                       |
| 1.63E-05  | 0.00012   | 2.678 | <a href="#">233085_s_at</a> | <a href="#">OBFC2A</a>   | oligonucleotide/oligosaccharide-binding fold containing 2A                                     |
| 0.0007062 | 0.0012815 | 2.676 | <a href="#">204823_at</a>   | <a href="#">NAV3</a>     | neuron navigator 3                                                                             |
| 0.0003045 | 0.0006919 | 2.672 | <a href="#">220987_s_at</a> | <a href="#">NUAK2</a>    | NUAK family, SNF1-like kinase, 2                                                               |
| 4.19E-05  | 0.0001929 | 2.670 | <a href="#">204359_at</a>   | <a href="#">FLRT2</a>    | fibronectin leucine rich transmembrane protein 2                                               |
| 5.20E-05  | 0.0002202 | 2.665 | <a href="#">233337_s_at</a> | <a href="#">SEZ6L2</a>   | seizure related 6 homolog (mouse)-like 2                                                       |
| 0.0006752 | 0.0012361 | 2.664 | <a href="#">203435_s_at</a> | <a href="#">MME</a>      | membrane metallo-endopeptidase                                                                 |
| 0.0002924 | 0.0006739 | 2.662 | <a href="#">56256_at</a>    | <a href="#">SIDT2</a>    | SID1 transmembrane family, member 2                                                            |
| 7.20E-06  | 8.26E-05  | 2.660 | <a href="#">203097_s_at</a> | <a href="#">RAPGEF2</a>  | Rap guanine nucleotide exchange factor (GEF) 2                                                 |
| 5.21E-05  | 0.0002202 | 2.658 | <a href="#">214164_x_at</a> | <a href="#">CA12</a>     | carbonic anhydrase XII                                                                         |
| 0.0003347 | 0.0007358 | 2.657 | <a href="#">218309_at</a>   | <a href="#">CAMK2N1</a>  | calcium/calmodulin-dependent protein kinase II inhibitor 1                                     |
| 0.0003588 | 0.0007734 | 2.654 | <a href="#">205880_at</a>   | <a href="#">PRKD1</a>    | protein kinase D1                                                                              |
| 0.000702  | 0.0012769 | 2.651 | <a href="#">237183_at</a>   | <a href="#">GALNT5</a>   | UDP-N-acetyl-alpha-D-galactosamine:polypeptide N-acetylgalactosaminyltransferase 5 (GalNAc-T5) |
| 0.0009284 | 0.0015795 | 2.637 | <a href="#">211026_s_at</a> | <a href="#">MGLL</a>     | monoglyceride lipase                                                                           |

|           |           |       |                              |                          |                                                                                                   |
|-----------|-----------|-------|------------------------------|--------------------------|---------------------------------------------------------------------------------------------------|
| 4.17E-05  | 0.0001924 | 2.635 | <a href="#">219501_at</a>    | <a href="#">ENOX1</a>    | ecto-NOX disulfide-thiol exchanger 1                                                              |
| 0.000185  | 0.0004847 | 2.633 | <a href="#">205832_at</a>    | <a href="#">CPA4</a>     | carboxypeptidase A4                                                                               |
| 6.80E-05  | 0.0002597 | 2.633 | <a href="#">212813_at</a>    | <a href="#">JAM3</a>     | junctional adhesion molecule 3                                                                    |
| 0.0003696 | 0.0007918 | 2.632 | <a href="#">223769_x_at</a>  | <a href="#">HYI</a>      | hydroxypyruvate isomerase homolog (E. coli)                                                       |
| 5.90E-06  | 7.80E-05  | 2.627 | <a href="#">227396_at</a>    | <a href="#">PTPRJ</a>    | protein tyrosine phosphatase, receptor type, J                                                    |
| 0.0009455 | 0.0016058 | 2.620 | <a href="#">224940_s_at</a>  | <a href="#">PAPPA</a>    | pregnancy-associated plasma protein A, pappalysin 1                                               |
| 0.0006375 | 0.0011799 | 2.619 | <a href="#">243041_s_at</a>  | <a href="#">RBM53</a>    | RNA binding motif, single stranded interacting protein                                            |
| 2.68E-05  | 0.0001554 | 2.615 | <a href="#">201849_at</a>    | <a href="#">BNIP3</a>    | BCL2/adenovirus E1B 19kDa interacting protein 3                                                   |
| 0.0002581 | 0.0006182 | 2.609 | <a href="#">205498_at</a>    | <a href="#">GHR</a>      | growth hormone receptor                                                                           |
| 1.87E-05  | 0.0001289 | 2.600 | <a href="#">222872_x_at</a>  | <a href="#">OBFC2A</a>   | oligonucleotide/oligosaccharide-binding fold containing 2A                                        |
| 0.0002651 | 0.0006296 | 2.600 | <a href="#">209632_at</a>    | <a href="#">PPP2R3A</a>  | protein phosphatase 2 (formerly 2A), regulatory subunit B@#%&@#%&, alpha                          |
| 0.0003459 | 0.0007542 | 2.594 | <a href="#">202552_s_at</a>  | <a href="#">CRIM1</a>    | cysteine rich transmembrane BMP regulator 1 (chordin-like)                                        |
| 0.0001848 | 0.0004847 | 2.591 | <a href="#">221760_at</a>    | <a href="#">MAN1A1</a>   | mannosidase, alpha, class 1A, member 1                                                            |
| 5.10E-06  | 7.25E-05  | 2.580 | <a href="#">207233_s_at</a>  | <a href="#">MITF</a>     | microphthalmia-associated transcription factor                                                    |
| 5.10E-05  | 0.0002176 | 2.578 | <a href="#">201105_at</a>    | <a href="#">LGALS1</a>   | lectin, galactoside-binding, soluble, 1                                                           |
| 0.0003563 | 0.000773  | 2.572 | <a href="#">228890_at</a>    | <a href="#">ATOH8</a>    | atonal homolog 8 (Drosophila)                                                                     |
| 0.0001635 | 0.0004398 | 2.572 | <a href="#">239202_at</a>    | <a href="#">NA</a>       | NA                                                                                                |
| 0.0002873 | 0.0006649 | 2.570 | <a href="#">209894_at</a>    | <a href="#">LEPR</a>     | leptin receptor                                                                                   |
| 0.0007971 | 0.0014058 | 2.569 | <a href="#">227966_s_at</a>  | <a href="#">CCDC74B</a>  | coiled-coil domain containing 74B                                                                 |
| 2.24E-05  | 0.0001414 | 2.568 | <a href="#">228234_at</a>    | <a href="#">TICAM2</a>   | toll-like receptor adaptor molecule 2                                                             |
| 1.54E-05  | 0.000118  | 2.565 | <a href="#">216869_at</a>    | <a href="#">PDE1C</a>    | phosphodiesterase 1C, calmodulin-dependent 70kDa                                                  |
| 0.0001599 | 0.0004361 | 2.563 | <a href="#">209651_at</a>    | <a href="#">TGFB11</a>   | transforming growth factor beta 1 induced transcript 1                                            |
| 3.55E-05  | 0.0001776 | 2.551 | <a href="#">225871_at</a>    | <a href="#">STEAP2</a>   | six transmembrane epithelial antigen of the prostate 2                                            |
| 5.62E-05  | 0.000231  | 2.550 | <a href="#">203282_at</a>    | <a href="#">GBE1</a>     | glucan (1,4-alpha-), branching enzyme 1                                                           |
| 0.0003026 | 0.0006911 | 2.534 | <a href="#">1558693_s_at</a> | <a href="#">C1orf85</a>  | chromosome 1 open reading frame 85                                                                |
| 0.0002066 | 0.0005243 | 2.532 | <a href="#">237310_at</a>    | <a href="#">NA</a>       | NA                                                                                                |
| 1.30E-05  | 0.0001089 | 2.528 | <a href="#">209210_s_at</a>  | <a href="#">FERMT2</a>   | fermitin family homolog 2 (Drosophila)                                                            |
| 0.0001751 | 0.0004647 | 2.524 | <a href="#">205479_s_at</a>  | <a href="#">PLAU</a>     | plasminogen activator, urokinase                                                                  |
| 0.0002211 | 0.000553  | 2.519 | <a href="#">218330_s_at</a>  | <a href="#">NAV2</a>     | neuron navigator 2                                                                                |
| 0.0001167 | 0.00036   | 2.511 | <a href="#">229784_at</a>    | <a href="#">MGC16121</a> | hypothetical protein MGC16121                                                                     |
| 2.78E-05  | 0.0001591 | 2.505 | <a href="#">212646_at</a>    | <a href="#">RFTN1</a>    | raftlin, lipid raft linker 1                                                                      |
| 0.0001884 | 0.0004925 | 2.503 | <a href="#">204099_at</a>    | <a href="#">SMARCD3</a>  | SWI/SNF related, matrix associated, actin dependent regulator of chromatin, subfamily d, member 3 |
| 0.000101  | 0.0003288 | 2.501 | <a href="#">223805_at</a>    | <a href="#">OSBPL6</a>   | oxysterol binding protein-like 6                                                                  |
| 1.68E-05  | 0.0001217 | 2.493 | <a href="#">200808_s_at</a>  | <a href="#">ZYX</a>      | zyxin                                                                                             |
| 2.12E-05  | 0.0001377 | 2.491 | <a href="#">213035_at</a>    | <a href="#">ANKRD28</a>  | ankyrin repeat domain 28                                                                          |
| 0.0001972 | 0.000506  | 2.484 | <a href="#">225442_at</a>    | <a href="#">DDR2</a>     | discoidin domain receptor tyrosine kinase 2                                                       |
| 9.30E-06  | 9.40E-05  | 2.483 | <a href="#">212012_at</a>    | <a href="#">PXDN</a>     | peroxidasin homolog (Drosophila)                                                                  |
| 8.49E-05  | 0.0003004 | 2.476 | <a href="#">203882_at</a>    | <a href="#">IRF9</a>     | interferon regulatory factor 9                                                                    |
| 6.00E-06  | 7.89E-05  | 2.475 | <a href="#">209365_s_at</a>  | <a href="#">ECM1</a>     | extracellular matrix protein 1                                                                    |
| 3.80E-06  | 6.75E-05  | 2.472 | <a href="#">226609_at</a>    | <a href="#">DCBLD1</a>   | discoidin, CUB and LCCL domain containing 1                                                       |
| 4.07E-05  | 0.0001895 | 2.467 | <a href="#">227533_at</a>    | <a href="#">NA</a>       | NA                                                                                                |
| 7.30E-06  | 8.32E-05  | 2.465 | <a href="#">209289_at</a>    | <a href="#">NFIB</a>     | nuclear factor I/B                                                                                |
| 1.46E-05  | 0.0001146 | 2.465 | <a href="#">209351_at</a>    | <a href="#">KRT14</a>    | keratin 14                                                                                        |

|           |           |       |                              |                         |                                                                    |
|-----------|-----------|-------|------------------------------|-------------------------|--------------------------------------------------------------------|
| 4.70E-06  | 7.04E-05  | 2.464 | <a href="#">225798 at</a>    | <a href="#">JAZF1</a>   | JAZF zinc finger 1                                                 |
| 7.40E-06  | 8.32E-05  | 2.460 | <a href="#">203438 at</a>    | <a href="#">STC2</a>    | stanniocalcin 2                                                    |
| 1.34E-05  | 0.000111  | 2.457 | <a href="#">228708 at</a>    | <a href="#">RAB27B</a>  | RAB27B, member RAS oncogene family                                 |
| 0.0003879 | 0.0008195 | 2.456 | <a href="#">243366 s at</a>  | <a href="#">NA</a>      | NA                                                                 |
| 1.09E-05  | 9.98E-05  | 2.455 | <a href="#">215706 x at</a>  | <a href="#">ZYX</a>     | zyxin                                                              |
| 0.0003241 | 0.000722  | 2.452 | <a href="#">214633 at</a>    | <a href="#">SOX3</a>    | SRY (sex determining region Y)-box 3                               |
| 0.0001226 | 0.0003687 | 2.444 | <a href="#">235308 at</a>    | <a href="#">ZBTB20</a>  | zinc finger and BTB domain containing 20                           |
| 2.26E-05  | 0.0001414 | 2.435 | <a href="#">203408 s at</a>  | <a href="#">SATB1</a>   | SATB homeobox 1                                                    |
| 6.14E-05  | 0.0002423 | 2.434 | <a href="#">226773 at</a>    | <a href="#">NA</a>      | NA                                                                 |
| 3.23E-05  | 0.0001702 | 2.434 | <a href="#">211538 s at</a>  | <a href="#">HSPA2</a>   | heat shock 70kDa protein 2                                         |
| 0.0007933 | 0.0014024 | 2.432 | <a href="#">227166 at</a>    | <a href="#">DNAJC18</a> | DnaJ (Hsp40) homolog, subfamily C, member 18                       |
| 0.0006161 | 0.0011503 | 2.430 | <a href="#">232752 at</a>    | <a href="#">NA</a>      | NA                                                                 |
| 0.0001538 | 0.0004291 | 2.429 | <a href="#">238934 at</a>    | <a href="#">NA</a>      | NA                                                                 |
| 1.08E-05  | 9.98E-05  | 2.425 | <a href="#">223170 at</a>    | <a href="#">TMEM98</a>  | transmembrane protein 98                                           |
| 0.0003975 | 0.0008337 | 2.423 | <a href="#">230240 at</a>    | <a href="#">NA</a>      | NA                                                                 |
| 2.99E-05  | 0.0001665 | 2.422 | <a href="#">209290 s at</a>  | <a href="#">NFIB</a>    | nuclear factor I/B                                                 |
| 0.000265  | 0.0006296 | 2.421 | <a href="#">228555 at</a>    | <a href="#">CAMK2D</a>  | calcium/calmodulin-dependent protein kinase II delta               |
| 6.40E-06  | 8.04E-05  | 2.420 | <a href="#">205330 at</a>    | <a href="#">MN1</a>     | meningioma (disrupted in balanced translocation) 1                 |
| 4.80E-06  | 7.05E-05  | 2.419 | <a href="#">242775 at</a>    | <a href="#">NA</a>      | NA                                                                 |
| 5.96E-05  | 0.0002381 | 2.419 | <a href="#">209522 s at</a>  | <a href="#">CRAT</a>    | carnitine acetyltransferase                                        |
| 5.90E-05  | 0.0002369 | 2.416 | <a href="#">225710 at</a>    | <a href="#">GNB4</a>    | guanine nucleotide binding protein (G protein), beta polypeptide 4 |
| 0.0001623 | 0.0004398 | 2.408 | <a href="#">225897 at</a>    | <a href="#">MARCKS</a>  | myristoylated alanine-rich protein kinase C substrate              |
| 0.0001084 | 0.0003428 | 2.407 | <a href="#">219882 at</a>    | <a href="#">TTL7</a>    | tubulin tyrosine ligase-like family, member 7                      |
| 0.0001433 | 0.000407  | 2.407 | <a href="#">213800 at</a>    | <a href="#">CFH</a>     | complement factor H                                                |
| 0.0003782 | 0.0008052 | 2.407 | <a href="#">217892 s at</a>  | <a href="#">LIMA1</a>   | LIM domain and actin binding 1                                     |
| 2.20E-06  | 5.78E-05  | 2.407 | <a href="#">209732 at</a>    | <a href="#">CLEC2B</a>  | C-type lectin domain family 2, member B                            |
| 0.0004195 | 0.000867  | 2.405 | <a href="#">1569150 x at</a> | <a href="#">PDLIM7</a>  | PDZ and LIM domain 7 (enigma)                                      |
| 0.0008805 | 0.0015159 | 2.403 | <a href="#">209030 s at</a>  | <a href="#">CADM1</a>   | cell adhesion molecule 1                                           |
| 0.0001956 | 0.0005043 | 2.397 | <a href="#">227771 at</a>    | <a href="#">LIFR</a>    | leukemia inhibitory factor receptor alpha                          |
| 5.44E-05  | 0.0002265 | 2.396 | <a href="#">238917 s at</a>  | <a href="#">DENND5B</a> | DENN/MADD domain containing 5B                                     |
| 8.53E-05  | 0.0003009 | 2.392 | <a href="#">203184 at</a>    | <a href="#">FBN2</a>    | fibrillin 2                                                        |
| 0.0005346 | 0.0010384 | 2.391 | <a href="#">219346 at</a>    | <a href="#">LRFN3</a>   | leucine rich repeat and fibronectin type III domain containing 3   |
| 2.06E-05  | 0.0001354 | 2.387 | <a href="#">210143 at</a>    | <a href="#">ANXA10</a>  | annexin A10                                                        |
| 6.79E-05  | 0.0002597 | 2.387 | <a href="#">1553997 a at</a> | <a href="#">ASPHD1</a>  | aspartate beta-hydroxylase domain containing 1                     |
| 0.0001547 | 0.0004297 | 2.384 | <a href="#">213103 at</a>    | <a href="#">STARD13</a> | StAR-related lipid transfer (START) domain containing 13           |
| 0.0004617 | 0.0009271 | 2.382 | <a href="#">224819 at</a>    | <a href="#">TCEAL8</a>  | transcription elongation factor A (SII)-like 8                     |
| 0.0006015 | 0.0011333 | 2.381 | <a href="#">204881 s at</a>  | <a href="#">UGCG</a>    | UDP-glucose ceramide glucosyltransferase                           |
| 0.0003161 | 0.0007097 | 2.378 | <a href="#">210510 s at</a>  | <a href="#">NRP1</a>    | neuropilin 1                                                       |
| 2.90E-06  | 6.30E-05  | 2.378 | <a href="#">227115 at</a>    | <a href="#">NA</a>      | NA                                                                 |
| 1.00E-06  | 5.51E-05  | 2.375 | <a href="#">221036 s at</a>  | <a href="#">APH1B</a>   | anterior pharynx defective 1 homolog B (C. elegans)                |
| 0.000173  | 0.0004607 | 2.375 | <a href="#">208510 s at</a>  | <a href="#">PPARG</a>   | peroxisome proliferator-activated receptor gamma                   |
| 3.15E-05  | 0.0001684 | 2.370 | <a href="#">212345 s at</a>  | <a href="#">CREB3L2</a> | cAMP responsive element binding protein 3-like 2                   |
| 4.20E-06  | 6.83E-05  | 2.368 | <a href="#">213093 at</a>    | <a href="#">PRKCA</a>   | protein kinase C, alpha                                            |

|           |           |       |                              |                           |                                                                      |
|-----------|-----------|-------|------------------------------|---------------------------|----------------------------------------------------------------------|
| 9.00E-07  | 5.36E-05  | 2.366 | <a href="#">226989 at</a>    | <a href="#">RGMB</a>      | RGM domain family, member B                                          |
| 0.0007224 | 0.0013046 | 2.364 | <a href="#">215790 at</a>    | <a href="#">AJAP1</a>     | adherens junctions associated protein 1                              |
| 0.0004316 | 0.0008831 | 2.357 | <a href="#">226058 at</a>    | <a href="#">B3GNT9</a>    | UDP-GlcNAc:betaGal beta-1,3-N-acetylglucosaminyltransferase 9        |
| 7.70E-05  | 0.0002822 | 2.353 | <a href="#">213227 at</a>    | <a href="#">PGRMC2</a>    | progesterone receptor membrane component 2                           |
| 0.0001823 | 0.0004815 | 2.351 | <a href="#">213418 at</a>    | <a href="#">HSPA6</a>     | heat shock 70kDa protein 6 (HSP70B@#%&)                              |
| 0.0001962 | 0.0005049 | 2.345 | <a href="#">231406 at</a>    | <a href="#">ORAI2</a>     | ORAI calcium release-activated calcium modulator 2                   |
| 0.0003557 | 0.0007726 | 2.343 | <a href="#">209119 x at</a>  | <a href="#">NR2F2</a>     | nuclear receptor subfamily 2, group F, member 2                      |
| 0.0001444 | 0.0004084 | 2.332 | <a href="#">213906 at</a>    | <a href="#">MYBL1</a>     | v-myb myeloblastosis viral oncogene homolog (avian)-like 1           |
| 0.0003477 | 0.0007574 | 2.332 | <a href="#">213122 at</a>    | <a href="#">TSPYL5</a>    | TSPY-like 5                                                          |
| 0.0002411 | 0.0005928 | 2.331 | <a href="#">212013 at</a>    | <a href="#">PXDN</a>      | peroxidasin homolog (Drosophila)                                     |
| 2.85E-05  | 0.0001619 | 2.330 | <a href="#">236029 at</a>    | <a href="#">FAT3</a>      | FAT tumor suppressor homolog 3 (Drosophila)                          |
| 8.64E-05  | 0.0003024 | 2.328 | <a href="#">235911 at</a>    | <a href="#">LOC440995</a> | hypothetical gene supported by BC034933; BC068085                    |
| 0.0001228 | 0.0003687 | 2.326 | <a href="#">227370 at</a>    | <a href="#">FAM171B</a>   | family with sequence similarity 171, member B                        |
| 9.11E-05  | 0.0003106 | 2.321 | <a href="#">228046 at</a>    | <a href="#">ZNF827</a>    | zinc finger protein 827                                              |
| 6.03E-05  | 0.0002405 | 2.319 | <a href="#">217989 at</a>    | <a href="#">HSD17B11</a>  | hydroxysteroid (17-beta) dehydrogenase 11                            |
| 0.0006337 | 0.0011754 | 2.313 | <a href="#">206460 at</a>    | <a href="#">AJAP1</a>     | adherens junctions associated protein 1                              |
| 0.0004079 | 0.0008484 | 2.312 | <a href="#">202073 at</a>    | <a href="#">OPTN</a>      | optineurin                                                           |
| 0.0003128 | 0.0007037 | 2.309 | <a href="#">215613 at</a>    | <a href="#">ADAM12</a>    | ADAM metalloproteinase domain 12                                     |
| 1.92E-05  | 0.0001292 | 2.307 | <a href="#">205120 s at</a>  | <a href="#">SGCB</a>      | sarcoglycan, beta (43kDa dystrophin-associated glycoprotein)         |
| 2.19E-05  | 0.0001399 | 2.307 | <a href="#">230463 at</a>    | <a href="#">NA</a>        | NA                                                                   |
| 0.0002593 | 0.0006197 | 2.306 | <a href="#">224911 s at</a>  | <a href="#">DCBLD2</a>    | discoidin, CUB and LCCL domain containing 2                          |
| 0.0006183 | 0.0011534 | 2.304 | <a href="#">222288 at</a>    | <a href="#">NA</a>        | NA                                                                   |
| 0.0002559 | 0.0006149 | 2.304 | <a href="#">231725 at</a>    | <a href="#">PCDHB2</a>    | protocadherin beta 2                                                 |
| 2.82E-05  | 0.0001606 | 2.302 | <a href="#">205383 s at</a>  | <a href="#">ZBTB20</a>    | zinc finger and BTB domain containing 20                             |
| 0.0003117 | 0.0007028 | 2.296 | <a href="#">204966 at</a>    | <a href="#">BAI2</a>      | brain-specific angiogenesis inhibitor 2                              |
| 9.02E-05  | 0.0003095 | 2.295 | <a href="#">220326 s at</a>  | <a href="#">FLJ10357</a>  | hypothetical protein FLJ10357                                        |
| 5.57E-05  | 0.0002302 | 2.291 | <a href="#">212774 at</a>    | <a href="#">ZNF238</a>    | zinc finger protein 238                                              |
| 0.0001963 | 0.0005049 | 2.291 | <a href="#">204303 s at</a>  | <a href="#">KIAA0427</a>  | KIAA0427                                                             |
| 0.0007306 | 0.0013162 | 2.282 | <a href="#">204421 s at</a>  | <a href="#">FGF2</a>      | fibroblast growth factor 2 (basic)                                   |
| 0.0004531 | 0.0009131 | 2.281 | <a href="#">203136 at</a>    | <a href="#">RABAC1</a>    | Rab acceptor 1 (prenylated)                                          |
| 5.46E-05  | 0.0002265 | 2.280 | <a href="#">203390 s at</a>  | <a href="#">KIF3C</a>     | kinesin family member 3C                                             |
| 8.30E-06  | 8.89E-05  | 2.279 | <a href="#">212829 at</a>    | <a href="#">PIP4K2A</a>   | phosphatidylinositol-5-phosphate 4-kinase, type II, alpha            |
| 7.40E-06  | 8.32E-05  | 2.279 | <a href="#">201389 at</a>    | <a href="#">ITGA5</a>     | integrin, alpha 5 (fibronectin receptor, alpha polypeptide)          |
| 0.000101  | 0.0003288 | 2.278 | <a href="#">229521 at</a>    | <a href="#">FLJ36031</a>  | hypothetical protein FLJ36031                                        |
| 5.00E-06  | 7.16E-05  | 2.277 | <a href="#">221059 s at</a>  | <a href="#">CHST6</a>     | carbohydrate (N-acetylglucosamine 6-O) sulfotransferase 6            |
| 0.0001447 | 0.0004084 | 2.274 | <a href="#">1561064 a at</a> | <a href="#">NA</a>        | NA                                                                   |
| 0.0001355 | 0.0003948 | 2.270 | <a href="#">220559 at</a>    | <a href="#">EN1</a>       | engrailed homeobox 1                                                 |
| 8.61E-05  | 0.0003022 | 2.268 | <a href="#">230099 at</a>    | <a href="#">NA</a>        | NA                                                                   |
| 1.91E-05  | 0.0001292 | 2.266 | <a href="#">227489 at</a>    | <a href="#">SMURF2</a>    | SMAD specific E3 ubiquitin protein ligase 2                          |
| 2.54E-05  | 0.0001515 | 2.264 | <a href="#">212120 at</a>    | <a href="#">RHOQ</a>      | ras homolog gene family, member Q                                    |
| 0.0005605 | 0.0010733 | 2.263 | <a href="#">221024 s at</a>  | <a href="#">SLC2A10</a>   | solute carrier family 2 (facilitated glucose transporter), member 10 |
| 0.0005379 | 0.0010423 | 2.259 | <a href="#">213644 at</a>    | <a href="#">CCDC46</a>    | coiled-coil domain containing 46                                     |
| 5.90E-06  | 7.80E-05  | 2.257 | <a href="#">224583 at</a>    | <a href="#">COTL1</a>     | coactosin-like 1 (Dictyostelium)                                     |

|           |           |       |                              |                              |                                                                                                   |
|-----------|-----------|-------|------------------------------|------------------------------|---------------------------------------------------------------------------------------------------|
| 0.00018   | 0.000476  | 2.253 | <a href="#">218627_at</a>    | <a href="#">DRAM</a>         | damage-regulated autophagy modulator                                                              |
| 5.40E-06  | 7.54E-05  | 2.252 | <a href="#">227326_at</a>    | <a href="#">MXRA7</a>        | matrix-remodelling associated 7                                                                   |
| 0.0007809 | 0.001387  | 2.252 | <a href="#">221953_s_at</a>  | <a href="#">MT1P3</a>        | metallothionein 1 pseudogene 3                                                                    |
| 9.30E-06  | 9.40E-05  | 2.248 | <a href="#">210987_x_at</a>  | <a href="#">TPM1</a>         | tropomyosin 1 (alpha)                                                                             |
| 0.000436  | 0.0008897 | 2.247 | <a href="#">225163_at</a>    | <a href="#">FRMD4A</a>       | FERM domain containing 4A                                                                         |
| 2.20E-06  | 5.78E-05  | 2.247 | <a href="#">228739_at</a>    | <a href="#">LOC100131506</a> | hypothetical LOC100131506                                                                         |
| 0.0001492 | 0.0004185 | 2.245 | <a href="#">202551_s_at</a>  | <a href="#">CRIM1</a>        | cysteine rich transmembrane BMP regulator 1 (chordin-like)                                        |
| 8.08E-05  | 0.0002914 | 2.239 | <a href="#">201162_at</a>    | <a href="#">IGFBP7</a>       | insulin-like growth factor binding protein 7                                                      |
| 0.0002012 | 0.000514  | 2.236 | <a href="#">203813_s_at</a>  | <a href="#">SLIT3</a>        | slit homolog 3 (Drosophila)                                                                       |
| 0.0005447 | 0.0010526 | 2.235 | <a href="#">209340_at</a>    | <a href="#">UAP1</a>         | UDP-N-acetylglucosamine pyrophosphorylase 1                                                       |
| 6.85E-05  | 0.0002607 | 2.226 | <a href="#">204589_at</a>    | <a href="#">NUAK1</a>        | NUAK family, SNF1-like kinase, 1                                                                  |
| 0.0004431 | 0.0009018 | 2.226 | <a href="#">1569149_at</a>   | <a href="#">PDLIM7</a>       | PDZ and LIM domain 7 (enigma)                                                                     |
| 2.71E-05  | 0.0001559 | 2.224 | <a href="#">53991_at</a>     | <a href="#">DENND2A</a>      | DENN/MADD domain containing 2A                                                                    |
| 0.0005526 | 0.0010633 | 2.224 | <a href="#">1555471_a_at</a> | <a href="#">FMN2</a>         | formin 2                                                                                          |
| 0.000325  | 0.0007233 | 2.217 | <a href="#">227261_at</a>    | <a href="#">KLF12</a>        | Kruppel-like factor 12                                                                            |
| 0.0001128 | 0.0003547 | 2.217 | <a href="#">207719_x_at</a>  | <a href="#">CEP170</a>       | centrosomal protein 170kDa                                                                        |
| 0.0003965 | 0.0008324 | 2.216 | <a href="#">205407_at</a>    | <a href="#">RECK</a>         | reversion-inducing-cysteine-rich protein with kazal motifs                                        |
| 0.0001446 | 0.0004084 | 2.210 | <a href="#">239638_at</a>    | <a href="#">NA</a>           | NA                                                                                                |
| 0.0003865 | 0.0008182 | 2.208 | <a href="#">243864_at</a>    | <a href="#">CCDC80</a>       | coiled-coil domain containing 80                                                                  |
| 0.0003688 | 0.0007911 | 2.207 | <a href="#">241058_at</a>    | <a href="#">NA</a>           | NA                                                                                                |
| 0.0004088 | 0.0008495 | 2.206 | <a href="#">226694_at</a>    | <a href="#">AKAP2</a>        | A kinase (PRKA) anchor protein 2                                                                  |
| 0.0001422 | 0.0004054 | 2.204 | <a href="#">36553_at</a>     | <a href="#">ASMTL</a>        | acetylserotonin O-methyltransferase-like                                                          |
| 0.0004528 | 0.0009131 | 2.202 | <a href="#">237301_at</a>    | <a href="#">NA</a>           | NA                                                                                                |
| 1.33E-05  | 0.0001106 | 2.202 | <a href="#">226197_at</a>    | <a href="#">NA</a>           | NA                                                                                                |
| 3.65E-05  | 0.000179  | 2.201 | <a href="#">232067_at</a>    | <a href="#">C6orf168</a>     | chromosome 6 open reading frame 168                                                               |
| 0.0001903 | 0.0004963 | 2.200 | <a href="#">203874_s_at</a>  | <a href="#">SMARCA1</a>      | SWI/SNF related, matrix associated, actin dependent regulator of chromatin, subfamily a, member 1 |
| 0.0004505 | 0.0009103 | 2.199 | <a href="#">224229_s_at</a>  | <a href="#">AKT3</a>         | v-akt murine thymoma viral oncogene homolog 3 (protein kinase B, gamma)                           |
| 0.0004005 | 0.0008387 | 2.199 | <a href="#">243606_at</a>    | <a href="#">NA</a>           | NA                                                                                                |
| 1.80E-05  | 0.0001264 | 2.198 | <a href="#">226507_at</a>    | <a href="#">PAK1</a>         | p21 protein (Cdc42/Rac)-activated kinase 1                                                        |
| 0.0002658 | 0.0006302 | 2.196 | <a href="#">212561_at</a>    | <a href="#">DENND5A</a>      | DENN/MADD domain containing 5A                                                                    |
| 2.62E-05  | 0.0001531 | 2.194 | <a href="#">235343_at</a>    | <a href="#">VASH2</a>        | vasohibin 2                                                                                       |
| 9.14E-05  | 0.0003106 | 2.186 | <a href="#">227224_at</a>    | <a href="#">RALGPS2</a>      | Ral GEF with PH domain and SH3 binding motif 2                                                    |
| 0.0005152 | 0.0010129 | 2.185 | <a href="#">205596_s_at</a>  | <a href="#">SMURF2</a>       | SMAD specific E3 ubiquitin protein ligase 2                                                       |
| 0.0001429 | 0.0004064 | 2.185 | <a href="#">202440_s_at</a>  | <a href="#">ST5</a>          | suppression of tumorigenicity 5                                                                   |
| 0.000297  | 0.0006817 | 2.184 | <a href="#">213241_at</a>    | <a href="#">PLXNC1</a>       | plexin C1                                                                                         |
| 1.74E-05  | 0.0001233 | 2.181 | <a href="#">210135_s_at</a>  | <a href="#">SHOX2</a>        | short stature homeobox 2                                                                          |
| 0.0002474 | 0.0006047 | 2.179 | <a href="#">204604_at</a>    | <a href="#">PFTK1</a>        | PFTAIRE protein kinase 1                                                                          |
| 4.37E-05  | 0.000196  | 2.178 | <a href="#">218656_s_at</a>  | <a href="#">LHFP</a>         | lipoma HMGIC fusion partner                                                                       |
| 1.63E-05  | 0.00012   | 2.176 | <a href="#">226546_at</a>    | <a href="#">NA</a>           | NA                                                                                                |
| 2.27E-05  | 0.0001414 | 2.171 | <a href="#">219895_at</a>    | <a href="#">FAM70A</a>       | family with sequence similarity 70, member A                                                      |
| 0.0001226 | 0.0003687 | 2.169 | <a href="#">205741_s_at</a>  | <a href="#">DTNA</a>         | dystrobrevin, alpha                                                                               |
| 0.0002722 | 0.0006391 | 2.168 | <a href="#">203370_s_at</a>  | <a href="#">PDLIM7</a>       | PDZ and LIM domain 7 (enigma)                                                                     |
| 0.0004518 | 0.0009121 | 2.167 | <a href="#">235061_at</a>    | <a href="#">PPM1K</a>        | protein phosphatase 1K (PP2C domain containing)                                                   |

|           |           |       |                              |                              |                                                                                               |
|-----------|-----------|-------|------------------------------|------------------------------|-----------------------------------------------------------------------------------------------|
| 0.0005238 | 0.0010272 | 2.166 | <a href="#">222900_at</a>    | <a href="#">NA</a>           | NA                                                                                            |
| 0.0003396 | 0.0007426 | 2.166 | <a href="#">238532_at</a>    | <a href="#">DPF3</a>         | D4, zinc and double PHD fingers, family 3                                                     |
| 3.60E-06  | 6.75E-05  | 2.163 | <a href="#">235205_at</a>    | <a href="#">LOC100128259</a> | hypothetical protein LOC100128259                                                             |
| 0.0004627 | 0.0009283 | 2.162 | <a href="#">226853_at</a>    | <a href="#">BMP2K</a>        | BMP2 inducible kinase                                                                         |
| 1.19E-05  | 0.0001035 | 2.160 | <a href="#">210139_s_at</a>  | <a href="#">PMP22</a>        | peripheral myelin protein 22                                                                  |
| 0.0001827 | 0.0004817 | 2.160 | <a href="#">227088_at</a>    | <a href="#">PDE5A</a>        | phosphodiesterase 5A, cGMP-specific                                                           |
| 0.0007303 | 0.0013162 | 2.160 | <a href="#">225817_at</a>    | <a href="#">CGNL1</a>        | cingulin-like 1                                                                               |
| 0.0003927 | 0.0008259 | 2.156 | <a href="#">201701_s_at</a>  | <a href="#">PGRMC2</a>       | progesterone receptor membrane component 2                                                    |
| 0.0008437 | 0.0014696 | 2.152 | <a href="#">221261_x_at</a>  | <a href="#">MAGED4B</a>      | melanoma antigen family D, 4B                                                                 |
| 9.00E-06  | 9.33E-05  | 2.150 | <a href="#">217889_s_at</a>  | <a href="#">CYBRD1</a>       | cytochrome b reductase 1                                                                      |
| 8.74E-05  | 0.0003045 | 2.145 | <a href="#">213484_at</a>    | <a href="#">NA</a>           | NA                                                                                            |
| 0.0005973 | 0.0011264 | 2.143 | <a href="#">227226_at</a>    | <a href="#">MRAP2</a>        | melanocortin 2 receptor accessory protein 2                                                   |
| 6.25E-05  | 0.0002462 | 2.141 | <a href="#">241484_x_at</a>  | <a href="#">NA</a>           | NA                                                                                            |
| 0.0002363 | 0.0005833 | 2.139 | <a href="#">226955_at</a>    | <a href="#">AFAP1L1</a>      | actin filament associated protein 1-like 1                                                    |
| 1.53E-05  | 0.0001177 | 2.139 | <a href="#">208370_s_at</a>  | <a href="#">RCAN1</a>        | regulator of calcineurin 1                                                                    |
| 6.20E-06  | 7.96E-05  | 2.139 | <a href="#">224663_s_at</a>  | <a href="#">CFL2</a>         | cofilin 2 (muscle)                                                                            |
| 3.60E-05  | 0.0001785 | 2.139 | <a href="#">224791_at</a>    | <a href="#">ASAP1</a>        | ArfGAP with SH3 domain, ankyrin repeat and PH domain 1                                        |
| 0.0005427 | 0.0010497 | 2.138 | <a href="#">204368_at</a>    | <a href="#">SLCO2A1</a>      | solute carrier organic anion transporter family, member 2A1                                   |
| 0.0003078 | 0.0006973 | 2.135 | <a href="#">239162_at</a>    | <a href="#">NA</a>           | NA                                                                                            |
| 0.000584  | 0.0011077 | 2.134 | <a href="#">210319_x_at</a>  | <a href="#">MSX2</a>         | msh homeobox 2                                                                                |
| 9.74E-05  | 0.0003215 | 2.129 | <a href="#">201719_s_at</a>  | <a href="#">EPB41L2</a>      | erythrocyte membrane protein band 4.1-like 2                                                  |
| 0.0005096 | 0.0010063 | 2.128 | <a href="#">230722_at</a>    | <a href="#">BNC2</a>         | basonuclin 2                                                                                  |
| 0.0005868 | 0.0011112 | 2.127 | <a href="#">1555976_s_at</a> | <a href="#">MYL12A</a>       | myosin, light chain 12A, regulatory, non-sarcomeric                                           |
| 0.0001952 | 0.0005038 | 2.123 | <a href="#">213213_at</a>    | <a href="#">DIDO1</a>        | death inducer-obliterator 1                                                                   |
| 0.0007629 | 0.0013636 | 2.121 | <a href="#">237452_at</a>    | <a href="#">NA</a>           | NA                                                                                            |
| 0.0009117 | 0.0015593 | 2.119 | <a href="#">239431_at</a>    | <a href="#">TICAM2</a>       | toll-like receptor adaptor molecule 2                                                         |
| 0.0001011 | 0.0003288 | 2.118 | <a href="#">227929_at</a>    | <a href="#">NA</a>           | NA                                                                                            |
| 0.0003086 | 0.0006984 | 2.118 | <a href="#">231411_at</a>    | <a href="#">LHFP</a>         | lipoma HMGIC fusion partner                                                                   |
| 0.0001641 | 0.0004407 | 2.117 | <a href="#">225860_at</a>    | <a href="#">MT1P3</a>        | metallothionein 1 pseudogene 3                                                                |
| 5.13E-05  | 0.000218  | 2.117 | <a href="#">202074_s_at</a>  | <a href="#">OPTN</a>         | optineurin                                                                                    |
| 7.00E-04  | 0.0012743 | 2.114 | <a href="#">221435_x_at</a>  | <a href="#">HYI</a>          | hydroxypyruvate isomerase homolog (E. coli)                                                   |
| 0.0001399 | 0.0004014 | 2.111 | <a href="#">224927_at</a>    | <a href="#">KIAA1949</a>     | KIAA1949                                                                                      |
| 4.29E-05  | 0.0001945 | 2.109 | <a href="#">240312_at</a>    | <a href="#">LOC389895</a>    | hypothetical LOC389895                                                                        |
| 5.39E-05  | 0.0002248 | 2.100 | <a href="#">230741_at</a>    | <a href="#">NA</a>           | NA                                                                                            |
| 0.0001761 | 0.0004668 | 2.097 | <a href="#">223041_at</a>    | <a href="#">CD99L2</a>       | CD99 molecule-like 2                                                                          |
| 9.85E-05  | 0.0003242 | 2.093 | <a href="#">220136_s_at</a>  | <a href="#">CRYBA2</a>       | crystallin, beta A2                                                                           |
| 0.0005295 | 0.0010321 | 2.092 | <a href="#">204891_s_at</a>  | <a href="#">LCK</a>          | lymphocyte-specific protein tyrosine kinase                                                   |
| 0.0002176 | 0.0005473 | 2.087 | <a href="#">218486_at</a>    | <a href="#">KLF11</a>        | Kruppel-like factor 11                                                                        |
| 0.0004168 | 0.0008622 | 2.082 | <a href="#">202920_at</a>    | <a href="#">ANK2</a>         | ankyrin 2, neuronal                                                                           |
| 0.0002331 | 0.0005773 | 2.081 | <a href="#">225784_s_at</a>  | <a href="#">ZC4H2</a>        | zinc finger, C4H2 domain containing                                                           |
| 3.63E-05  | 0.0001789 | 2.080 | <a href="#">202665_s_at</a>  | <a href="#">WIPF1</a>        | WAS/WASL interacting protein family, member 1                                                 |
| 0.0002129 | 0.0005372 | 2.080 | <a href="#">228667_at</a>    | <a href="#">AGPAT4</a>       | 1-acylglycerol-3-phosphate O-acyltransferase 4 (lysophosphatidic acid acyltransferase, delta) |
| 3.98E-05  | 0.0001887 | 2.075 | <a href="#">202014_at</a>    | <a href="#">PPP1R15A</a>     | protein phosphatase 1, regulatory (inhibitor) subunit 15A                                     |



|           |           |       |                              |                          |                                                                                                              |
|-----------|-----------|-------|------------------------------|--------------------------|--------------------------------------------------------------------------------------------------------------|
| 0.0006094 | 0.0011432 | 2.073 | <a href="#">205347 s at</a>  | <a href="#">TMSB15A</a>  | thymosin beta 15a                                                                                            |
| 0.0005606 | 0.0010733 | 2.072 | <a href="#">239474 at</a>    | NA                       | NA                                                                                                           |
| 4.30E-05  | 0.0001945 | 2.067 | <a href="#">201825 s at</a>  | <a href="#">SCCPDH</a>   | saccharopine dehydrogenase (putative)                                                                        |
| 0.0004235 | 0.0008713 | 2.064 | <a href="#">210151 s at</a>  | <a href="#">DYRK3</a>    | dual-specificity tyrosine-(Y)-phosphorylation regulated kinase 3                                             |
| 0.0004617 | 0.0009271 | 2.062 | <a href="#">210619 s at</a>  | <a href="#">HYAL1</a>    | hyaluronoglucosaminidase 1                                                                                   |
| 0.0001319 | 0.0003878 | 2.062 | <a href="#">232341 x at</a>  | <a href="#">HABP4</a>    | hyaluronan binding protein 4                                                                                 |
| 0.000304  | 0.0006915 | 2.055 | <a href="#">1556346 at</a>   | NA                       | NA                                                                                                           |
| 0.000223  | 0.0005559 | 2.054 | <a href="#">202973 x at</a>  | <a href="#">FAM13A</a>   | family with sequence similarity 13, member A                                                                 |
| 0.0004213 | 0.0008691 | 2.041 | <a href="#">209602 s at</a>  | <a href="#">GATA3</a>    | GATA binding protein 3                                                                                       |
| 8.86E-05  | 0.0003063 | 2.039 | <a href="#">219061 s at</a>  | <a href="#">LAGE3</a>    | L antigen family, member 3                                                                                   |
| 0.0007895 | 0.0013979 | 2.031 | <a href="#">1554127 s at</a> | <a href="#">MSRB3</a>    | methionine sulfoxide reductase B3                                                                            |
| 0.0003716 | 0.0007941 | 2.027 | <a href="#">230264 s at</a>  | <a href="#">AP1S2</a>    | adaptor-related protein complex 1, sigma 2 subunit                                                           |
| 0.000597  | 0.0011264 | 2.021 | <a href="#">1552287 s at</a> | <a href="#">AFG3L1</a>   | AFG3 ATPase family gene 3-like 1 (S. cerevisiae)                                                             |
| 0.00033   | 0.0007294 | 2.021 | <a href="#">37028 at</a>     | <a href="#">PPP1R15A</a> | protein phosphatase 1, regulatory (inhibitor) subunit 15A                                                    |
| 0.0005671 | 0.001083  | 2.018 | <a href="#">236167 at</a>    | NA                       | NA                                                                                                           |
| 7.22E-05  | 0.0002698 | 2.018 | <a href="#">225355 at</a>    | <a href="#">NEURL1B</a>  | neutralized homolog 1B (Drosophila)                                                                          |
| 0.0003909 | 0.0008237 | 2.007 | <a href="#">1553960 at</a>   | <a href="#">SNX21</a>    | sorting nexin family member 21                                                                               |
| 0.0003749 | 0.0008004 | 2.007 | <a href="#">207264 at</a>    | <a href="#">KDELR3</a>   | KDEL (Lys-Asp-Glu-Leu) endoplasmic reticulum protein retention receptor 3                                    |
| 0.0002045 | 0.0005207 | 0.499 | <a href="#">204879 at</a>    | <a href="#">PDPN</a>     | podoplanin                                                                                                   |
| 0.0002675 | 0.0006307 | 0.497 | <a href="#">218204 s at</a>  | <a href="#">FYCO1</a>    | FYVE and coiled-coil domain containing 1                                                                     |
| 8.62E-05  | 0.0003022 | 0.496 | <a href="#">225726 s at</a>  | <a href="#">PLEKHH1</a>  | pleckstrin homology domain containing, family H (with MyTH4 domain) member 1                                 |
| 0.0007987 | 0.0014075 | 0.496 | <a href="#">238461 at</a>    | <a href="#">EIF4E3</a>   | eukaryotic translation initiation factor 4E family member 3                                                  |
| 0.000554  | 0.0010642 | 0.496 | <a href="#">203962 s at</a>  | <a href="#">NEBL</a>     | nebulette                                                                                                    |
| 0.0007581 | 0.0013561 | 0.496 | <a href="#">235542 at</a>    | <a href="#">TET3</a>     | tet oncogene family member 3                                                                                 |
| 0.000448  | 0.0009076 | 0.494 | <a href="#">226313 at</a>    | <a href="#">C10orf35</a> | chromosome 10 open reading frame 35                                                                          |
| 0.0003118 | 0.0007028 | 0.494 | <a href="#">219625 s at</a>  | <a href="#">COL4A3BP</a> | collagen, type IV, alpha 3 (Goodpasture antigen) binding protein                                             |
| 0.0004962 | 0.0009856 | 0.494 | <a href="#">1554246 at</a>   | <a href="#">C1orf210</a> | chromosome 1 open reading frame 210                                                                          |
| 0.0009701 | 0.0016296 | 0.491 | <a href="#">239309 at</a>    | <a href="#">DLX6</a>     | distal-less homeobox 6                                                                                       |
| 0.0006377 | 0.0011799 | 0.491 | <a href="#">239412 at</a>    | <a href="#">IRF5</a>     | interferon regulatory factor 5                                                                               |
| 0.0003121 | 0.0007028 | 0.489 | <a href="#">1554894 a at</a> | <a href="#">PCBD2</a>    | pterin-4 alpha-carbinolamine dehydratase/dimerization cofactor of hepatocyte nuclear factor 1 alpha (TCF1) 2 |
| 0.0001303 | 0.0003841 | 0.489 | <a href="#">238451 at</a>    | <a href="#">MPP7</a>     | membrane protein, palmitoylated 7 (MAGUK p55 subfamily member 7)                                             |
| 0.0009084 | 0.0015558 | 0.488 | <a href="#">225299 at</a>    | <a href="#">MYO5B</a>    | myosin VB                                                                                                    |
| 0.0007881 | 0.0013965 | 0.488 | <a href="#">235165 at</a>    | <a href="#">PARD6B</a>   | par-6 partitioning defective 6 homolog beta (C. elegans)                                                     |
| 0.0001159 | 0.0003595 | 0.486 | <a href="#">223466 x at</a>  | <a href="#">COL4A3BP</a> | collagen, type IV, alpha 3 (Goodpasture antigen) binding protein                                             |
| 8.83E-05  | 0.0003062 | 0.482 | <a href="#">221636 s at</a>  | <a href="#">MOSC2</a>    | MOCO sulphurase C-terminal domain containing 2                                                               |
| 0.0007847 | 0.0013915 | 0.481 | <a href="#">202342 s at</a>  | <a href="#">TRIM2</a>    | tripartite motif-containing 2                                                                                |
| 0.0002339 | 0.0005786 | 0.480 | <a href="#">201200 at</a>    | <a href="#">CREG1</a>    | cellular repressor of E1A-stimulated genes 1                                                                 |
| 0.0004454 | 0.0009048 | 0.480 | <a href="#">1556773 at</a>   | NA                       | NA                                                                                                           |
| 0.000853  | 0.0014801 | 0.480 | <a href="#">227404 s at</a>  | <a href="#">EGR1</a>     | early growth response 1                                                                                      |
| 0.0004223 | 0.0008704 | 0.479 | <a href="#">205770 at</a>    | <a href="#">GSR</a>      | glutathione reductase                                                                                        |
| 0.0001089 | 0.0003439 | 0.479 | <a href="#">239273 s at</a>  | <a href="#">MMP28</a>    | matrix metalloproteinase 28                                                                                  |
| 7.80E-05  | 0.0002843 | 0.479 | <a href="#">213260 at</a>    | <a href="#">FOXC1</a>    | forkhead box C1                                                                                              |

|           |           |       |                              |                           |                                                                                                |
|-----------|-----------|-------|------------------------------|---------------------------|------------------------------------------------------------------------------------------------|
| 2.80E-05  | 0.0001599 | 0.479 | <a href="#">1553055_a_at</a> | <a href="#">SLFN5</a>     | schlafen family member 5                                                                       |
| 0.0001694 | 0.0004522 | 0.478 | <a href="#">203021_at</a>    | <a href="#">SLPI</a>      | secretory leukocyte peptidase inhibitor                                                        |
| 5.69E-05  | 0.0002314 | 0.478 | <a href="#">219527_at</a>    | <a href="#">MOSC2</a>     | MOCO sulphurase C-terminal domain containing 2                                                 |
| 0.0006617 | 0.0012173 | 0.478 | <a href="#">223232_s_at</a>  | <a href="#">CGN</a>       | cingulin                                                                                       |
| 0.0001031 | 0.0003321 | 0.478 | <a href="#">212686_at</a>    | <a href="#">PPM1H</a>     | protein phosphatase 1H (PP2C domain containing)                                                |
| 0.0004239 | 0.0008713 | 0.477 | <a href="#">222587_s_at</a>  | <a href="#">GALNT7</a>    | UDP-N-acetyl-alpha-D-galactosamine:polypeptide N-acetylgalactosaminyltransferase 7 (GalNAc-T7) |
| 0.0002639 | 0.0006281 | 0.476 | <a href="#">204922_at</a>    | <a href="#">C11orf80</a>  | chromosome 11 open reading frame 80                                                            |
| 6.08E-05  | 0.0002416 | 0.476 | <a href="#">229377_at</a>    | <a href="#">GRTP1</a>     | growth hormone regulated TBC protein 1                                                         |
| 4.31E-05  | 0.0001945 | 0.476 | <a href="#">209885_at</a>    | <a href="#">RHOD</a>      | ras homolog gene family, member D                                                              |
| 0.0001084 | 0.0003428 | 0.475 | <a href="#">218510_x_at</a>  | <a href="#">FAM134B</a>   | family with sequence similarity 134, member B                                                  |
| 5.23E-05  | 0.0002206 | 0.474 | <a href="#">41660_at</a>     | <a href="#">CELSR1</a>    | cadherin, EGF LAG seven-pass G-type receptor 1 (flamingo homolog, Drosophila)                  |
| 0.0005554 | 0.001066  | 0.474 | <a href="#">209980_s_at</a>  | <a href="#">SHMT1</a>     | serine hydroxymethyltransferase 1 (soluble)                                                    |
| 0.0008976 | 0.0015422 | 0.474 | <a href="#">242726_at</a>    | NA                        | NA                                                                                             |
| 0.0004639 | 0.0009299 | 0.473 | <a href="#">227875_at</a>    | <a href="#">KLHL13</a>    | kelch-like 13 (Drosophila)                                                                     |
| 0.0006999 | 0.0012743 | 0.473 | <a href="#">235026_at</a>    | <a href="#">C12orf66</a>  | chromosome 12 open reading frame 66                                                            |
| 0.0009919 | 0.0016612 | 0.473 | <a href="#">239653_at</a>    | NA                        | NA                                                                                             |
| 9.76E-05  | 0.0003217 | 0.472 | <a href="#">244665_at</a>    | NA                        | NA                                                                                             |
| 0.0002634 | 0.0006276 | 0.472 | <a href="#">209385_s_at</a>  | <a href="#">PROSC</a>     | proline synthetase co-transcribed homolog (bacterial)                                          |
| 0.0002964 | 0.0006817 | 0.472 | <a href="#">215724_at</a>    | <a href="#">PLD1</a>      | phospholipase D1, phosphatidylcholine-specific                                                 |
| 0.0001273 | 0.0003777 | 0.471 | <a href="#">202409_at</a>    | <a href="#">IGF2</a>      | insulin-like growth factor 2 (somatomedin A)                                                   |
| 0.0001189 | 0.0003653 | 0.471 | <a href="#">240354_at</a>    | <a href="#">C12orf54</a>  | chromosome 12 open reading frame 54                                                            |
| 0.0001017 | 0.0003294 | 0.470 | <a href="#">205678_at</a>    | <a href="#">AP3B2</a>     | adaptor-related protein complex 3, beta 2 subunit                                              |
| 6.89E-05  | 0.0002609 | 0.470 | <a href="#">222269_at</a>    | <a href="#">APOOL</a>     | apolipoprotein O-like                                                                          |
| 6.68E-05  | 0.0002577 | 0.469 | <a href="#">218657_at</a>    | <a href="#">RAPGEFL1</a>  | Rap guanine nucleotide exchange factor (GEF)-like 1                                            |
| 0.0008512 | 0.0014793 | 0.468 | <a href="#">214040_s_at</a>  | <a href="#">GSN</a>       | gelsolin (amyloidosis, Finnish type)                                                           |
| 5.69E-05  | 0.0002314 | 0.467 | <a href="#">204636_at</a>    | <a href="#">COL17A1</a>   | collagen, type XVII, alpha 1                                                                   |
| 0.0001135 | 0.0003554 | 0.467 | <a href="#">1569201_a_at</a> | NA                        | NA                                                                                             |
| 0.0003789 | 0.0008059 | 0.466 | <a href="#">211367_s_at</a>  | <a href="#">CASP1</a>     | caspase 1, apoptosis-related cysteine peptidase (interleukin 1, beta, convertase)              |
| 0.0008122 | 0.0014258 | 0.465 | <a href="#">212339_at</a>    | <a href="#">EPB41L1</a>   | erythrocyte membrane protein band 4.1-like 1                                                   |
| 0.0001211 | 0.000367  | 0.465 | <a href="#">223183_at</a>    | <a href="#">AGPAT3</a>    | 1-acylglycerol-3-phosphate O-acyltransferase 3                                                 |
| 0.0002362 | 0.0005833 | 0.464 | <a href="#">208165_s_at</a>  | <a href="#">PRSS16</a>    | protease, serine, 16 (thymus)                                                                  |
| 0.0003282 | 0.0007261 | 0.464 | <a href="#">200766_at</a>    | <a href="#">CTSD</a>      | cathepsin D                                                                                    |
| 0.0009957 | 0.0016664 | 0.463 | <a href="#">216969_s_at</a>  | <a href="#">KIF22</a>     | kinesin family member 22                                                                       |
| 0.0003152 | 0.0007084 | 0.462 | <a href="#">213912_at</a>    | <a href="#">TBC1D30</a>   | TBC1 domain family, member 30                                                                  |
| 2.59E-05  | 0.0001529 | 0.462 | <a href="#">1556194_a_at</a> | NA                        | NA                                                                                             |
| 0.0001739 | 0.0004626 | 0.461 | <a href="#">226622_at</a>    | <a href="#">MUC20</a>     | mucin 20, cell surface associated                                                              |
| 0.0005036 | 0.0009971 | 0.460 | <a href="#">235684_s_at</a>  | <a href="#">SESN3</a>     | sestrin 3                                                                                      |
| 0.0007415 | 0.0013316 | 0.460 | <a href="#">206300_s_at</a>  | <a href="#">PTH LH</a>    | parathyroid hormone-like hormone                                                               |
| 0.0009233 | 0.0015733 | 0.460 | <a href="#">228338_at</a>    | <a href="#">LOC120376</a> | Uncharacterized protein LOC120376                                                              |
| 0.0001989 | 0.0005087 | 0.460 | <a href="#">213618_at</a>    | <a href="#">ARAP2</a>     | ArfGAP with RhoGAP domain, ankyrin repeat and PH domain 2                                      |
| 3.90E-05  | 0.0001868 | 0.460 | <a href="#">226789_at</a>    | <a href="#">LOC647121</a> | embigin homolog (mouse) pseudogene                                                             |
| 0.0001578 | 0.0004327 | 0.460 | <a href="#">226213_at</a>    | <a href="#">ERBB3</a>     | v-erb-b2 erythroblastic leukemia viral oncogene homolog 3 (avian)                              |
| 0.0007687 | 0.0013707 | 0.459 | <a href="#">230788_at</a>    | <a href="#">GCNT2</a>     | glucosaminyl (N-acetyl) transferase 2, I-branching enzyme (I blood group)                      |

|           |           |       |                              |                              |                                                                         |
|-----------|-----------|-------|------------------------------|------------------------------|-------------------------------------------------------------------------|
| 0.0005804 | 0.0011018 | 0.459 | <a href="#">242055 at</a>    | <a href="#">NA</a>           | NA                                                                      |
| 0.000752  | 0.0013484 | 0.458 | <a href="#">1555812 a at</a> | <a href="#">ARHGDI B</a>     | Rho GDP dissociation inhibitor (GDI) beta                               |
| 2.20E-06  | 5.78E-05  | 0.458 | <a href="#">204475 at</a>    | <a href="#">MMP1</a>         | matrix metalloproteinase 1 (interstitial collagenase)                   |
| 0.0002906 | 0.0006705 | 0.458 | <a href="#">228220 at</a>    | <a href="#">FCHO2</a>        | FCH domain only 2                                                       |
| 0.0005115 | 0.0010092 | 0.457 | <a href="#">220266 s at</a>  | <a href="#">KLF4</a>         | Kruppel-like factor 4 (gut)                                             |
| 1.83E-05  | 0.0001277 | 0.457 | <a href="#">227346 at</a>    | <a href="#">IKZF1</a>        | IKAROS family zinc finger 1 (Ikaros)                                    |
| 0.000946  | 0.0016058 | 0.457 | <a href="#">218792 s at</a>  | <a href="#">BSPRY</a>        | B-box and SPRY domain containing                                        |
| 3.01E-05  | 0.0001672 | 0.457 | <a href="#">206023 at</a>    | <a href="#">NMU</a>          | neuromedin U                                                            |
| 0.0002493 | 0.0006074 | 0.456 | <a href="#">217924 at</a>    | <a href="#">C6orf106</a>     | chromosome 6 open reading frame 106                                     |
| 9.02E-05  | 0.0003095 | 0.455 | <a href="#">225407 at</a>    | <a href="#">MBP</a>          | myelin basic protein                                                    |
| 5.01E-05  | 0.0002149 | 0.455 | <a href="#">223194 s at</a>  | <a href="#">SLC22A23</a>     | solute carrier family 22, member 23                                     |
| 0.0005409 | 0.0010471 | 0.454 | <a href="#">215386 at</a>    | <a href="#">NA</a>           | NA                                                                      |
| 0.0004269 | 0.0008751 | 0.454 | <a href="#">225412 at</a>    | <a href="#">TMEM87B</a>      | transmembrane protein 87B                                               |
| 5.06E-05  | 0.0002163 | 0.453 | <a href="#">229296 at</a>    | <a href="#">LOC100128501</a> | hypothetical protein LOC100128501                                       |
| 3.53E-05  | 0.0001774 | 0.453 | <a href="#">224164 at</a>    | <a href="#">TPM3</a>         | tropomyosin 3                                                           |
| 0.0003804 | 0.0008068 | 0.453 | <a href="#">213849 s at</a>  | <a href="#">PPP2R2B</a>      | protein phosphatase 2 (formerly 2A), regulatory subunit B, beta isoform |
| 0.0001366 | 0.0003965 | 0.453 | <a href="#">201566 x at</a>  | <a href="#">ID2</a>          | inhibitor of DNA binding 2, dominant negative helix-loop-helix protein  |
| 3.30E-06  | 6.60E-05  | 0.452 | <a href="#">227475 at</a>    | <a href="#">FOXQ1</a>        | forkhead box Q1                                                         |
| 0.0003035 | 0.0006915 | 0.452 | <a href="#">217974 at</a>    | <a href="#">TM7SF3</a>       | transmembrane 7 superfamily member 3                                    |
| 1.80E-06  | 5.65E-05  | 0.451 | <a href="#">202744 at</a>    | <a href="#">SLC20A2</a>      | solute carrier family 20 (phosphate transporter), member 2              |
| 0.000267  | 0.0006302 | 0.451 | <a href="#">203726 s at</a>  | <a href="#">LAMA3</a>        | laminin, alpha 3                                                        |
| 0.0001672 | 0.0004469 | 0.451 | <a href="#">216782 at</a>    | <a href="#">NA</a>           | NA                                                                      |
| 0.000489  | 0.0009733 | 0.451 | <a href="#">219764 at</a>    | <a href="#">FZD10</a>        | frizzled homolog 10 (Drosophila)                                        |
| 0.0005686 | 0.001084  | 0.451 | <a href="#">1558404 at</a>   | <a href="#">LOC644242</a>    | hypothetical protein LOC644242                                          |
| 0.0001399 | 0.0004014 | 0.450 | <a href="#">207414 s at</a>  | <a href="#">PCSK6</a>        | proprotein convertase subtilisin/kexin type 6                           |
| 1.42E-05  | 0.000113  | 0.449 | <a href="#">224840 at</a>    | <a href="#">FKBP5</a>        | FK506 binding protein 5                                                 |
| 0.0002755 | 0.0006435 | 0.449 | <a href="#">219985 at</a>    | <a href="#">HS3ST3A1</a>     | heparan sulfate (glucosamine) 3-O-sulfotransferase 3A1                  |
| 8.58E-05  | 0.0003017 | 0.448 | <a href="#">207076 s at</a>  | <a href="#">ASS1</a>         | argininosuccinate synthetase 1                                          |
| 0.0002228 | 0.0005559 | 0.447 | <a href="#">213340 s at</a>  | <a href="#">KIAA0495</a>     | KIAA0495                                                                |
| 0.0001988 | 0.0005087 | 0.447 | <a href="#">217744 s at</a>  | <a href="#">PERP</a>         | PERP, TP53 apoptosis effector                                           |
| 0.0001387 | 0.0003995 | 0.447 | <a href="#">235112 at</a>    | <a href="#">NA</a>           | NA                                                                      |
| 9.15E-05  | 0.0003106 | 0.446 | <a href="#">213900 at</a>    | <a href="#">C9orf61</a>      | chromosome 9 open reading frame 61                                      |
| 6.31E-05  | 0.0002473 | 0.446 | <a href="#">201691 s at</a>  | <a href="#">TPD52</a>        | tumor protein D52                                                       |
| 3.52E-05  | 0.0001774 | 0.446 | <a href="#">223092 at</a>    | <a href="#">ANKH</a>         | ankylosis, progressive homolog (mouse)                                  |
| 0.0004128 | 0.0008551 | 0.444 | <a href="#">230193 at</a>    | <a href="#">WDR66</a>        | WD repeat domain 66                                                     |
| 2.67E-05  | 0.0001554 | 0.444 | <a href="#">203837 at</a>    | <a href="#">MAP3K5</a>       | mitogen-activated protein kinase kinase kinase 5                        |
| 0.0001446 | 0.0004084 | 0.444 | <a href="#">232017 at</a>    | <a href="#">TJP2</a>         | tight junction protein 2 (zona occludens 2)                             |
| 3.91E-05  | 0.0001869 | 0.444 | <a href="#">230406 at</a>    | <a href="#">NA</a>           | NA                                                                      |
| 4.30E-05  | 0.0001945 | 0.444 | <a href="#">202436 s at</a>  | <a href="#">CYP1B1</a>       | cytochrome P450, family 1, subfamily B, polypeptide 1                   |
| 0.0002822 | 0.0006564 | 0.443 | <a href="#">242417 at</a>    | <a href="#">PLEKHA7</a>      | pleckstrin homology domain containing, family A member 7                |
| 0.0001912 | 0.0004975 | 0.443 | <a href="#">226113 at</a>    | <a href="#">ZNF436</a>       | zinc finger protein 436                                                 |
| 2.16E-05  | 0.0001391 | 0.443 | <a href="#">203964 at</a>    | <a href="#">NMI</a>          | N-myc (and STAT) interactor                                             |
| 9.10E-06  | 9.35E-05  | 0.443 | <a href="#">202085 at</a>    | <a href="#">TJP2</a>         | tight junction protein 2 (zona occludens 2)                             |

|           |           |       |                              |                             |                                                                                 |
|-----------|-----------|-------|------------------------------|-----------------------------|---------------------------------------------------------------------------------|
| 8.90E-06  | 9.27E-05  | 0.443 | <a href="#">222477_s_at</a>  | <a href="#">TM7SF3</a>      | transmembrane 7 superfamily member 3                                            |
| 1.20E-05  | 0.0001036 | 0.442 | <a href="#">212964_at</a>    | <a href="#">HIC2</a>        | hypermethylated in cancer 2                                                     |
| 0.0003846 | 0.000815  | 0.441 | <a href="#">223182_s_at</a>  | <a href="#">AGPAT3</a>      | 1-acylglycerol-3-phosphate O-acyltransferase 3                                  |
| 7.59E-05  | 0.0002795 | 0.441 | <a href="#">218776_s_at</a>  | <a href="#">TMEM62</a>      | transmembrane protein 62                                                        |
| 6.61E-05  | 0.0002563 | 0.439 | <a href="#">225619_at</a>    | <a href="#">SLAIN1</a>      | SLAIN motif family, member 1                                                    |
| 4.98E-05  | 0.0002145 | 0.439 | <a href="#">203143_s_at</a>  | <a href="#">KIAA0040</a>    | KIAA0040                                                                        |
| 0.0009234 | 0.0015733 | 0.439 | <a href="#">1553989_a_at</a> | <a href="#">ATP6V1C2</a>    | ATPase, H+ transporting, lysosomal 42kDa, V1 subunit C2                         |
| 0.0001751 | 0.0004647 | 0.439 | <a href="#">225440_at</a>    | <a href="#">AGPAT3</a>      | 1-acylglycerol-3-phosphate O-acyltransferase 3                                  |
| 0.000129  | 0.0003813 | 0.439 | <a href="#">212240_s_at</a>  | <a href="#">PIK3R1</a>      | phosphoinositide-3-kinase, regulatory subunit 1 (alpha)                         |
| 0.0001058 | 0.0003374 | 0.438 | <a href="#">232406_at</a>    | <a href="#">NA</a>          | NA                                                                              |
| 0.0009866 | 0.0016536 | 0.438 | <a href="#">230493_at</a>    | <a href="#">SHISA2</a>      | shisa homolog 2 (Xenopus laevis)                                                |
| 3.09E-05  | 0.0001676 | 0.437 | <a href="#">201900_s_at</a>  | <a href="#">AKR1A1</a>      | aldo-keto reductase family 1, member A1 (aldehyde reductase)                    |
| 0.0003235 | 0.0007213 | 0.436 | <a href="#">207382_at</a>    | <a href="#">TP63</a>        | tumor protein p63                                                               |
| 0.0002203 | 0.000553  | 0.436 | <a href="#">1560800_at</a>   | <a href="#">NA</a>          | NA                                                                              |
| 0.000113  | 0.0003549 | 0.435 | <a href="#">203855_at</a>    | <a href="#">WDR47</a>       | WD repeat domain 47                                                             |
| 0.0004017 | 0.0008402 | 0.435 | <a href="#">220038_at</a>    | <a href="#">SGK3</a>        | serum/glucocorticoid regulated kinase family, member 3                          |
| 4.32E-05  | 0.0001946 | 0.435 | <a href="#">233487_s_at</a>  | <a href="#">LRRC8A</a>      | leucine rich repeat containing 8 family, member A                               |
| 7.40E-05  | 0.0002743 | 0.434 | <a href="#">221610_s_at</a>  | <a href="#">STAP2</a>       | signal transducing adaptor family member 2                                      |
| 0.0005319 | 0.0010341 | 0.434 | <a href="#">238673_at</a>    | <a href="#">SAMD12</a>      | sterile alpha motif domain containing 12                                        |
| 1.06E-05  | 9.90E-05  | 0.434 | <a href="#">218677_at</a>    | <a href="#">S100A14</a>     | S100 calcium binding protein A14                                                |
| 0.0002535 | 0.000611  | 0.434 | <a href="#">230769_at</a>    | <a href="#">DENND2C</a>     | DENN/MADD domain containing 2C                                                  |
| 9.80E-06  | 9.43E-05  | 0.434 | <a href="#">214058_at</a>    | <a href="#">MYCL1</a>       | v-myc myelocytomatosis viral oncogene homolog 1, lung carcinoma derived (avian) |
| 0.0001545 | 0.0004297 | 0.433 | <a href="#">218035_s_at</a>  | <a href="#">RBM47</a>       | RNA binding motif protein 47                                                    |
| 2.70E-05  | 0.0001559 | 0.432 | <a href="#">226803_at</a>    | <a href="#">CHMP4C</a>      | chromatin modifying protein 4C                                                  |
| 0.0006218 | 0.001159  | 0.432 | <a href="#">216488_s_at</a>  | <a href="#">ATP11A</a>      | ATPase, class VI, type 11A                                                      |
| 0.0007189 | 0.0013003 | 0.432 | <a href="#">212128_s_at</a>  | <a href="#">DAG1</a>        | dystroglycan 1 (dystrophin-associated glycoprotein 1)                           |
| 3.11E-05  | 0.0001676 | 0.432 | <a href="#">220225_at</a>    | <a href="#">IRX4</a>        | iroquois homeobox 4                                                             |
| 0.000628  | 0.0011667 | 0.432 | <a href="#">210237_at</a>    | <a href="#">ARTN</a>        | artemin                                                                         |
| 0.0002937 | 0.0006762 | 0.431 | <a href="#">1559607_s_at</a> | <a href="#">GBP6</a>        | guanylate binding protein family, member 6                                      |
| 0.0002977 | 0.0006827 | 0.431 | <a href="#">205455_at</a>    | <a href="#">MST1R</a>       | macrophage stimulating 1 receptor (c-met-related tyrosine kinase)               |
| 9.34E-05  | 0.0003143 | 0.430 | <a href="#">205109_s_at</a>  | <a href="#">ARHGEF4</a>     | Rho guanine nucleotide exchange factor (GEF) 4                                  |
| 0.000909  | 0.0015558 | 0.430 | <a href="#">223500_at</a>    | <a href="#">CPLX1</a>       | complexin 1                                                                     |
| 0.0001152 | 0.0003588 | 0.429 | <a href="#">1562226_at</a>   | <a href="#">VWDE</a>        | von Willebrand factor D and EGF domains                                         |
| 4.54E-05  | 0.0002001 | 0.429 | <a href="#">208908_s_at</a>  | <a href="#">CAST</a>        | calpastatin                                                                     |
| 9.23E-05  | 0.0003122 | 0.428 | <a href="#">225133_at</a>    | <a href="#">KLF3</a>        | Kruppel-like factor 3 (basic)                                                   |
| 4.06E-05  | 0.0001895 | 0.428 | <a href="#">235141_at</a>    | <a href="#">MARVELD2</a>    | MARVEL domain containing 2                                                      |
| 0.0004356 | 0.0008897 | 0.428 | <a href="#">223094_s_at</a>  | <a href="#">ANKH</a>        | ankylosis, progressive homolog (mouse)                                          |
| 4.07E-05  | 0.0001895 | 0.428 | <a href="#">242354_at</a>    | <a href="#">NA</a>          | NA                                                                              |
| 0.0002298 | 0.0005697 | 0.427 | <a href="#">204667_at</a>    | <a href="#">FOXA1</a>       | forkhead box A1                                                                 |
| 3.12E-05  | 0.0001676 | 0.427 | <a href="#">220354_at</a>    | <a href="#">hCG_1774568</a> | similar to hCG1774568                                                           |
| 0.0001157 | 0.0003595 | 0.427 | <a href="#">212719_at</a>    | <a href="#">PHLPP</a>       | PH domain and leucine rich repeat protein phosphatase                           |
| 4.27E-05  | 0.0001945 | 0.427 | <a href="#">209748_at</a>    | <a href="#">SPAST</a>       | spastin                                                                         |
| 4.08E-05  | 0.0001895 | 0.426 | <a href="#">212812_at</a>    | <a href="#">NA</a>          | NA                                                                              |

|           |           |       |                              |                            |                                                                           |
|-----------|-----------|-------|------------------------------|----------------------------|---------------------------------------------------------------------------|
| 3.80E-05  | 0.0001836 | 0.425 | <a href="#">238455 at</a>    | <a href="#">NA</a>         | NA                                                                        |
| 0.000438  | 0.000893  | 0.425 | <a href="#">220285 at</a>    | <a href="#">FAM108B1</a>   | family with sequence similarity 108, member B1                            |
| 0.0001654 | 0.0004431 | 0.425 | <a href="#">204573 at</a>    | <a href="#">CROT</a>       | carnitine O-octanoyltransferase                                           |
| 3.25E-05  | 0.0001705 | 0.425 | <a href="#">1556518 at</a>   | <a href="#">NA</a>         | NA                                                                        |
| 4.05E-05  | 0.0001895 | 0.424 | <a href="#">243256 at</a>    | <a href="#">MKNK1</a>      | MAP kinase interacting serine/threonine kinase 1                          |
| 0.0001405 | 0.0004016 | 0.424 | <a href="#">226499 at</a>    | <a href="#">NRARP</a>      | NOTCH-regulated ankyrin repeat protein                                    |
| 0.0001828 | 0.0004817 | 0.424 | <a href="#">206582 s at</a>  | <a href="#">GPR56</a>      | G protein-coupled receptor 56                                             |
| 0.0001266 | 0.0003761 | 0.423 | <a href="#">228575 at</a>    | <a href="#">IL20RB</a>     | interleukin 20 receptor beta                                              |
| 0.0003572 | 0.000773  | 0.423 | <a href="#">204967 at</a>    | <a href="#">SHROOM2</a>    | shroom family member 2                                                    |
| 0.0001173 | 0.0003613 | 0.422 | <a href="#">1552477 a at</a> | <a href="#">IRF6</a>       | interferon regulatory factor 6                                            |
| 0.0001417 | 0.0004045 | 0.422 | <a href="#">222603 at</a>    | <a href="#">ERMP1</a>      | endoplasmic reticulum metalloproteinase 1                                 |
| 1.08E-05  | 9.98E-05  | 0.422 | <a href="#">203509 at</a>    | <a href="#">SORL1</a>      | sortilin-related receptor, L(DLR class) A repeats-containing              |
| 2.08E-05  | 0.0001359 | 0.422 | <a href="#">218802 at</a>    | <a href="#">CCDC109B</a>   | coiled-coil domain containing 109B                                        |
| 0.0003893 | 0.0008211 | 0.422 | <a href="#">1559425 at</a>   | <a href="#">NA</a>         | NA                                                                        |
| 0.0009665 | 0.0016259 | 0.421 | <a href="#">203210 s at</a>  | <a href="#">RFC5</a>       | replication factor C (activator 1) 5, 36.5kDa                             |
| 0.0008999 | 0.0015449 | 0.420 | <a href="#">212974 at</a>    | <a href="#">DENND3</a>     | DENN/MADD domain containing 3                                             |
| 0.0002501 | 0.0006074 | 0.420 | <a href="#">243000 at</a>    | <a href="#">CDK6</a>       | cyclin-dependent kinase 6                                                 |
| 0.0007084 | 0.0012838 | 0.420 | <a href="#">201009 s at</a>  | <a href="#">TXNIP</a>      | thioredoxin interacting protein                                           |
| 9.50E-05  | 0.0003168 | 0.420 | <a href="#">207030 s at</a>  | <a href="#">CSRP2</a>      | cysteine and glycine-rich protein 2                                       |
| 5.04E-05  | 0.0002158 | 0.420 | <a href="#">202761 s at</a>  | <a href="#">SYNE2</a>      | spectrin repeat containing, nuclear envelope 2                            |
| 0.000626  | 0.0011649 | 0.419 | <a href="#">234331 s at</a>  | <a href="#">FAM84A</a>     | family with sequence similarity 84, member A                              |
| 0.0001636 | 0.0004398 | 0.418 | <a href="#">206099 at</a>    | <a href="#">PRKCH</a>      | protein kinase C, eta                                                     |
| 2.25E-05  | 0.0001414 | 0.417 | <a href="#">228894 at</a>    | <a href="#">LOC253842</a>  | hypothetical protein LOC253842                                            |
| 0.0003457 | 0.0007542 | 0.417 | <a href="#">202435 s at</a>  | <a href="#">CYP1B1</a>     | cytochrome P450, family 1, subfamily B, polypeptide 1                     |
| 6.70E-06  | 8.10E-05  | 0.416 | <a href="#">219211 at</a>    | <a href="#">USP18</a>      | ubiquitin specific peptidase 18                                           |
| 3.80E-05  | 0.0001836 | 0.415 | <a href="#">205560 at</a>    | <a href="#">PCSK5</a>      | proprotein convertase subtilisin/kexin type 5                             |
| 0.0003021 | 0.0006906 | 0.415 | <a href="#">205968 at</a>    | <a href="#">KCNS3</a>      | potassium voltage-gated channel, delayed-rectifier, subfamily S, member 3 |
| 0.0002754 | 0.0006435 | 0.414 | <a href="#">236381 s at</a>  | <a href="#">WDR8</a>       | WD repeat domain 8                                                        |
| 5.49E-05  | 0.0002273 | 0.414 | <a href="#">215023 s at</a>  | <a href="#">PEX1</a>       | peroxisomal biogenesis factor 1                                           |
| 1.33E-05  | 0.0001106 | 0.414 | <a href="#">235068 at</a>    | <a href="#">ZDHHC21</a>    | zinc finger, DHHC-type containing 21                                      |
| 0.0001344 | 0.0003926 | 0.414 | <a href="#">232081 at</a>    | <a href="#">NA</a>         | NA                                                                        |
| 0.0007541 | 0.00135   | 0.413 | <a href="#">231950 at</a>    | <a href="#">ZNF658</a>     | zinc finger protein 658                                                   |
| 4.04E-05  | 0.0001895 | 0.412 | <a href="#">236009 at</a>    | <a href="#">NA</a>         | NA                                                                        |
| 0.0003315 | 0.0007312 | 0.412 | <a href="#">238320 at</a>    | <a href="#">NCRNA00084</a> | non-protein coding RNA 84                                                 |
| 0.0003338 | 0.0007351 | 0.412 | <a href="#">225354 s at</a>  | <a href="#">SH3BGRL2</a>   | SH3 domain binding glutamic acid-rich protein like 2                      |
| 0.0005034 | 0.0009971 | 0.411 | <a href="#">207675 x at</a>  | <a href="#">ARTN</a>       | artemin                                                                   |
| 0.0002735 | 0.0006415 | 0.410 | <a href="#">235092 at</a>    | <a href="#">NA</a>         | NA                                                                        |
| 0.0003199 | 0.0007174 | 0.410 | <a href="#">209631 s at</a>  | <a href="#">GPR37</a>      | G protein-coupled receptor 37 (endothelin receptor type B-like)           |
| 0.0003758 | 0.0008016 | 0.410 | <a href="#">210372 s at</a>  | <a href="#">TPD52L1</a>    | tumor protein D52-like 1                                                  |
| 1.90E-06  | 5.65E-05  | 0.410 | <a href="#">201764 at</a>    | <a href="#">TMEM106C</a>   | transmembrane protein 106C                                                |
| 0.0001619 | 0.0004394 | 0.410 | <a href="#">207949 s at</a>  | <a href="#">ICA1</a>       | islet cell autoantigen 1, 69kDa                                           |
| 0.0009611 | 0.0016211 | 0.409 | <a href="#">233924 s at</a>  | <a href="#">EXOC6</a>      | exocyst complex component 6                                               |
| 0.0006961 | 0.0012693 | 0.407 | <a href="#">216918 s at</a>  | <a href="#">DST</a>        | dystonin                                                                  |

|           |           |       |                              |                              |                                                                               |
|-----------|-----------|-------|------------------------------|------------------------------|-------------------------------------------------------------------------------|
| 0.0003112 | 0.0007028 | 0.406 | <a href="#">206683_at</a>    | <a href="#">ZNF165</a>       | zinc finger protein 165                                                       |
| 0.0001003 | 0.0003277 | 0.406 | <a href="#">216258_s_at</a>  | <a href="#">SERPINB13</a>    | serpin peptidase inhibitor, clade B (ovalbumin), member 13                    |
| 7.14E-05  | 0.0002685 | 0.406 | <a href="#">236279_at</a>    | NA                           | NA                                                                            |
| 0.000163  | 0.0004398 | 0.405 | <a href="#">224097_s_at</a>  | <a href="#">F11R</a>         | F11 receptor                                                                  |
| 0.0003645 | 0.0007834 | 0.405 | <a href="#">223632_s_at</a>  | <a href="#">BCAN</a>         | brevican                                                                      |
| 3.22E-05  | 0.0001702 | 0.405 | <a href="#">218499_at</a>    | <a href="#">RP6-213H19.1</a> | serine/threonine protein kinase MST4                                          |
| 0.0001792 | 0.0004744 | 0.404 | <a href="#">228653_at</a>    | <a href="#">SAMD5</a>        | sterile alpha motif domain containing 5                                       |
| 1.72E-05  | 0.0001227 | 0.404 | <a href="#">235583_at</a>    | <a href="#">ILDR1</a>        | immunoglobulin-like domain containing receptor 1                              |
| 1.21E-05  | 0.0001036 | 0.404 | <a href="#">219476_at</a>    | <a href="#">C1orf116</a>     | chromosome 1 open reading frame 116                                           |
| 0.0003712 | 0.000794  | 0.403 | <a href="#">206515_at</a>    | <a href="#">CYP4F3</a>       | cytochrome P450, family 4, subfamily F, polypeptide 3                         |
| 9.41E-05  | 0.000316  | 0.403 | <a href="#">200965_s_at</a>  | <a href="#">ABLIM1</a>       | actin binding LIM protein 1                                                   |
| 0.0006032 | 0.0011335 | 0.402 | <a href="#">243862_at</a>    | NA                           | NA                                                                            |
| 6.12E-05  | 0.0002423 | 0.401 | <a href="#">212599_at</a>    | <a href="#">AUTS2</a>        | autism susceptibility candidate 2                                             |
| 0.0004657 | 0.0009318 | 0.401 | <a href="#">1565863_at</a>   | NA                           | NA                                                                            |
| 0.0001625 | 0.0004398 | 0.401 | <a href="#">225009_at</a>    | <a href="#">CMTM4</a>        | CKLF-like MARVEL transmembrane domain containing 4                            |
| 0.0006721 | 0.0012325 | 0.401 | <a href="#">200946_x_at</a>  | <a href="#">GLUD1</a>        | glutamate dehydrogenase 1                                                     |
| 3.95E-05  | 0.000188  | 0.401 | <a href="#">225846_at</a>    | <a href="#">RBM35A</a>       | RNA binding motif protein 35A                                                 |
| 4.24E-05  | 0.0001945 | 0.400 | <a href="#">212560_at</a>    | <a href="#">SORL1</a>        | sortilin-related receptor, L(DLR class) A repeats-containing                  |
| 0.0006107 | 0.0011432 | 0.400 | <a href="#">219115_s_at</a>  | <a href="#">IL20RA</a>       | interleukin 20 receptor, alpha                                                |
| 2.49E-05  | 0.0001493 | 0.400 | <a href="#">226597_at</a>    | <a href="#">REEP6</a>        | receptor accessory protein 6                                                  |
| 0.0001376 | 0.0003977 | 0.400 | <a href="#">205286_at</a>    | <a href="#">TFAP2C</a>       | transcription factor AP-2 gamma (activating enhancer binding protein 2 gamma) |
| 0.0001427 | 0.0004064 | 0.399 | <a href="#">224460_s_at</a>  | <a href="#">L2HGDH</a>       | L-2-hydroxyglutarate dehydrogenase                                            |
| 0.0004496 | 0.0009093 | 0.399 | <a href="#">231257_at</a>    | <a href="#">TCERG1L</a>      | transcription elongation regulator 1-like                                     |
| 0.0007967 | 0.0014058 | 0.398 | <a href="#">228010_at</a>    | <a href="#">PPP2R2C</a>      | protein phosphatase 2 (formerly 2A), regulatory subunit B, gamma isoform      |
| 0.0002135 | 0.0005382 | 0.398 | <a href="#">238599_at</a>    | <a href="#">IRAK1BP1</a>     | interleukin-1 receptor-associated kinase 1 binding protein 1                  |
| 0.0009678 | 0.0016269 | 0.398 | <a href="#">225123_at</a>    | NA                           | NA                                                                            |
| 0.0007784 | 0.0013836 | 0.398 | <a href="#">210480_s_at</a>  | <a href="#">MYO6</a>         | myosin VI                                                                     |
| 0.0002208 | 0.000553  | 0.398 | <a href="#">227642_at</a>    | <a href="#">TFCP2L1</a>      | transcription factor CP2-like 1                                               |
| 0.0001667 | 0.000446  | 0.398 | <a href="#">219265_at</a>    | <a href="#">MOBK12B</a>      | MOB1, Mps One Binder kinase activator-like 2B (yeast)                         |
| 0.0005803 | 0.0011018 | 0.397 | <a href="#">226226_at</a>    | <a href="#">TMEM45B</a>      | transmembrane protein 45B                                                     |
| 2.89E-05  | 0.0001634 | 0.396 | <a href="#">208792_s_at</a>  | <a href="#">CLU</a>          | clusterin                                                                     |
| 9.02E-05  | 0.0003095 | 0.396 | <a href="#">1555765_a_at</a> | <a href="#">GNG4</a>         | guanine nucleotide binding protein (G protein), gamma 4                       |
| 2.50E-06  | 6.21E-05  | 0.396 | <a href="#">231916_at</a>    | <a href="#">EXOSC6</a>       | exosome component 6                                                           |
| 3.00E-07  | 3.57E-05  | 0.396 | <a href="#">218706_s_at</a>  | <a href="#">GRAMD3</a>       | GRAM domain containing 3                                                      |
| 0.0001925 | 0.0004994 | 0.395 | <a href="#">242899_at</a>    | NA                           | NA                                                                            |
| 5.29E-05  | 0.0002223 | 0.395 | <a href="#">206600_s_at</a>  | <a href="#">SLC16A5</a>      | solute carrier family 16, member 5 (monocarboxylic acid transporter 6)        |
| 0.0001461 | 0.0004114 | 0.395 | <a href="#">214045_at</a>    | <a href="#">LIAS</a>         | lipoic acid synthetase                                                        |
| 4.58E-05  | 0.0002011 | 0.394 | <a href="#">220262_s_at</a>  | <a href="#">DLK2</a>         | delta-like 2 homolog (Drosophila)                                             |
| 0.0001217 | 0.0003679 | 0.393 | <a href="#">215723_s_at</a>  | <a href="#">PLD1</a>         | phospholipase D1, phosphatidylcholine-specific                                |
| 0.0003314 | 0.0007312 | 0.393 | <a href="#">201565_s_at</a>  | <a href="#">ID2</a>          | inhibitor of DNA binding 2, dominant negative helix-loop-helix protein        |
| 0.0004965 | 0.0009856 | 0.392 | <a href="#">213075_at</a>    | <a href="#">OLFML2A</a>      | olfactomedin-like 2A                                                          |
| 0.0003882 | 0.0008195 | 0.392 | <a href="#">209212_s_at</a>  | <a href="#">KLF5</a>         | Kruppel-like factor 5 (intestinal)                                            |
| 7.43E-05  | 0.0002749 | 0.392 | <a href="#">226907_at</a>    | <a href="#">PPP1R14C</a>     | protein phosphatase 1, regulatory (inhibitor) subunit 14C                     |

|           |           |       |                              |                          |                                                                               |
|-----------|-----------|-------|------------------------------|--------------------------|-------------------------------------------------------------------------------|
| 5.77E-05  | 0.0002338 | 0.391 | <a href="#">208791_at</a>    | <a href="#">CLU</a>      | clusterin                                                                     |
| 4.72E-05  | 0.0002048 | 0.391 | <a href="#">243278_at</a>    | <a href="#">FOXP2</a>    | forkhead box P2                                                               |
| 0.0003416 | 0.0007462 | 0.391 | <a href="#">208937_s_at</a>  | <a href="#">ID1</a>      | inhibitor of DNA binding 1, dominant negative helix-loop-helix protein        |
| 6.00E-07  | 4.84E-05  | 0.391 | <a href="#">204971_at</a>    | <a href="#">CSTA</a>     | cystatin A (stefin A)                                                         |
| 0.000602  | 0.0011333 | 0.391 | <a href="#">211776_s_at</a>  | <a href="#">EPB41L3</a>  | erythrocyte membrane protein band 4.1-like 3                                  |
| 3.03E-05  | 0.0001675 | 0.390 | <a href="#">235075_at</a>    | <a href="#">DSG3</a>     | desmoglein 3 (pemphigus vulgaris antigen)                                     |
| 3.56E-05  | 0.0001777 | 0.390 | <a href="#">220520_s_at</a>  | <a href="#">NUP62CL</a>  | nucleoporin 62kDa C-terminal like                                             |
| 0.0001012 | 0.0003288 | 0.390 | <a href="#">235201_at</a>    | <a href="#">FOXP2</a>    | forkhead box P2                                                               |
| 0.0002264 | 0.0005631 | 0.390 | <a href="#">223574_x_at</a>  | <a href="#">PPP2R2C</a>  | protein phosphatase 2 (formerly 2A), regulatory subunit B, gamma isoform      |
| 0.0006129 | 0.0011462 | 0.390 | <a href="#">227379_at</a>    | <a href="#">MBOAT1</a>   | membrane bound O-acyltransferase domain containing 1                          |
| 1.52E-05  | 0.0001177 | 0.389 | <a href="#">238689_at</a>    | <a href="#">GPR110</a>   | G protein-coupled receptor 110                                                |
| 0.0002825 | 0.0006565 | 0.389 | <a href="#">226489_at</a>    | <a href="#">TMCC3</a>    | transmembrane and coiled-coil domain family 3                                 |
| 0.0004236 | 0.0008713 | 0.389 | <a href="#">239945_at</a>    | <a href="#">NA</a>       | NA                                                                            |
| 0.0001634 | 0.0004398 | 0.387 | <a href="#">214434_at</a>    | <a href="#">HSPA12A</a>  | heat shock 70kDa protein 12A                                                  |
| 4.61E-05  | 0.000202  | 0.387 | <a href="#">238593_at</a>    | <a href="#">C11orf80</a> | chromosome 11 open reading frame 80                                           |
| 0.0004057 | 0.0008454 | 0.386 | <a href="#">213996_at</a>    | <a href="#">YPEL1</a>    | yippee-like 1 (Drosophila)                                                    |
| 4.05E-05  | 0.0001895 | 0.384 | <a href="#">219481_at</a>    | <a href="#">TTC13</a>    | tetratricopeptide repeat domain 13                                            |
| 0.0007754 | 0.0013794 | 0.384 | <a href="#">235050_at</a>    | <a href="#">SLC2A12</a>  | solute carrier family 2 (facilitated glucose transporter), member 12          |
| 1.38E-05  | 0.000111  | 0.384 | <a href="#">239132_at</a>    | <a href="#">NOS1</a>     | nitric oxide synthase 1 (neuronal)                                            |
| 0.0001319 | 0.0003878 | 0.383 | <a href="#">203126_at</a>    | <a href="#">IMPA2</a>    | inositol(myo)-1(or 4)-monophosphatase 2                                       |
| 9.25E-05  | 0.0003122 | 0.383 | <a href="#">233634_at</a>    | <a href="#">MARVELD3</a> | MARVEL domain containing 3                                                    |
| 0.0004006 | 0.0008387 | 0.383 | <a href="#">227228_s_at</a>  | <a href="#">CCDC88C</a>  | coiled-coil domain containing 88C                                             |
| 4.60E-06  | 7.04E-05  | 0.383 | <a href="#">202421_at</a>    | <a href="#">IGSF3</a>    | immunoglobulin superfamily, member 3                                          |
| 0.0008373 | 0.0014596 | 0.382 | <a href="#">205724_at</a>    | <a href="#">PKP1</a>     | plakophilin 1 (ectodermal dysplasia/skin fragility syndrome)                  |
| 0.000335  | 0.0007358 | 0.382 | <a href="#">224221_s_at</a>  | <a href="#">VAV3</a>     | vav 3 guanine nucleotide exchange factor                                      |
| 0.0003698 | 0.0007918 | 0.381 | <a href="#">227032_at</a>    | <a href="#">PLXNA2</a>   | plexin A2                                                                     |
| 1.72E-05  | 0.0001227 | 0.380 | <a href="#">202454_s_at</a>  | <a href="#">ERBB3</a>    | v-erb-b2 erythroblastic leukemia viral oncogene homolog 3 (avian)             |
| 0.000572  | 0.0010886 | 0.380 | <a href="#">231727_s_at</a>  | <a href="#">MIF4GD</a>   | MIF4G domain containing                                                       |
| 7.00E-06  | 8.24E-05  | 0.380 | <a href="#">204224_s_at</a>  | <a href="#">GCH1</a>     | GTP cyclohydrolase 1                                                          |
| 0.0003389 | 0.0007418 | 0.380 | <a href="#">226114_at</a>    | <a href="#">ZNF436</a>   | zinc finger protein 436                                                       |
| 8.43E-05  | 0.0002992 | 0.380 | <a href="#">36499_at</a>     | <a href="#">CELSR2</a>   | cadherin, EGF LAG seven-pass G-type receptor 2 (flamingo homolog, Drosophila) |
| 3.90E-06  | 6.75E-05  | 0.380 | <a href="#">229764_at</a>    | <a href="#">TPRG1</a>    | tumor protein p63 regulated 1                                                 |
| 0.0003582 | 0.000773  | 0.380 | <a href="#">204199_at</a>    | <a href="#">RALGPS1</a>  | Ral GEF with PH domain and SH3 binding motif 1                                |
| 2.57E-05  | 0.0001525 | 0.379 | <a href="#">233198_at</a>    | <a href="#">GOLGA2L1</a> | golgi autoantigen, golgin subfamily a, 2-like 1                               |
| 0.0003099 | 0.0007007 | 0.379 | <a href="#">222496_s_at</a>  | <a href="#">RBM47</a>    | RNA binding motif protein 47                                                  |
| 3.00E-06  | 6.40E-05  | 0.379 | <a href="#">225618_at</a>    | <a href="#">ARHGAP27</a> | Rho GTPase activating protein 27                                              |
| 0.0001447 | 0.0004084 | 0.379 | <a href="#">210547_x_at</a>  | <a href="#">ICA1</a>     | islet cell autoantigen 1, 69kDa                                               |
| 0.0007086 | 0.0012838 | 0.379 | <a href="#">225611_at</a>    | <a href="#">MAST4</a>    | microtubule associated serine/threonine kinase family member 4                |
| 4.70E-06  | 7.04E-05  | 0.378 | <a href="#">223245_at</a>    | <a href="#">STRBP</a>    | spermatid perinuclear RNA binding protein                                     |
| 0.000107  | 0.0003393 | 0.377 | <a href="#">1555716_a_at</a> | <a href="#">CXADR</a>    | coxsackie virus and adenovirus receptor                                       |
| 1.37E-05  | 0.000111  | 0.377 | <a href="#">202831_at</a>    | <a href="#">GPX2</a>     | glutathione peroxidase 2 (gastrointestinal)                                   |
| 7.70E-06  | 8.41E-05  | 0.377 | <a href="#">209596_at</a>    | <a href="#">MXRA5</a>    | matrix-remodelling associated 5                                               |
| 0.0001906 | 0.0004965 | 0.376 | <a href="#">207549_x_at</a>  | <a href="#">CD46</a>     | CD46 molecule, complement regulatory protein                                  |



|           |           |       |                              |                          |                                                                                                  |
|-----------|-----------|-------|------------------------------|--------------------------|--------------------------------------------------------------------------------------------------|
| 5.71E-05  | 0.0002318 | 0.376 | <a href="#">1438_at</a>      | <a href="#">EPHB3</a>    | EPH receptor B3                                                                                  |
| 2.86E-05  | 0.0001621 | 0.376 | <a href="#">218692_at</a>    | <a href="#">GOLSYN</a>   | Golgi-localized protein                                                                          |
| 0.0002439 | 0.0005981 | 0.375 | <a href="#">210145_at</a>    | <a href="#">PLA2G4A</a>  | phospholipase A2, group IVA (cytosolic, calcium-dependent)                                       |
| 0.0009764 | 0.0016389 | 0.375 | <a href="#">212681_at</a>    | <a href="#">EPB41L3</a>  | erythrocyte membrane protein band 4.1-like 3                                                     |
| 8.27E-05  | 0.0002973 | 0.375 | <a href="#">235146_at</a>    | <a href="#">TMCC3</a>    | transmembrane and coiled-coil domain family 3                                                    |
| 6.70E-06  | 8.10E-05  | 0.375 | <a href="#">224650_at</a>    | <a href="#">MAL2</a>     | mal, T-cell differentiation protein 2                                                            |
| 0.0003583 | 0.000773  | 0.374 | <a href="#">219344_at</a>    | <a href="#">SLC29A3</a>  | solute carrier family 29 (nucleoside transporters), member 3                                     |
| 0.0007183 | 0.0013003 | 0.374 | <a href="#">227863_at</a>    | <a href="#">CTSD</a>     | cathepsin D                                                                                      |
| 9.06E-05  | 0.0003099 | 0.374 | <a href="#">1569114_at</a>   | <a href="#">NA</a>       | NA                                                                                               |
| 0.0002843 | 0.0006593 | 0.373 | <a href="#">219676_at</a>    | <a href="#">ZSCAN16</a>  | zinc finger and SCAN domain containing 16                                                        |
| 8.67E-05  | 0.000303  | 0.373 | <a href="#">1554544_a_at</a> | <a href="#">MBP</a>      | myelin basic protein                                                                             |
| 0.000411  | 0.0008525 | 0.372 | <a href="#">244353_s_at</a>  | <a href="#">SLC2A12</a>  | solute carrier family 2 (facilitated glucose transporter), member 12                             |
| 4.25E-05  | 0.0001945 | 0.372 | <a href="#">218764_at</a>    | <a href="#">PRKCH</a>    | protein kinase C, eta                                                                            |
| 0.0001249 | 0.0003721 | 0.372 | <a href="#">211806_s_at</a>  | <a href="#">KCNJ15</a>   | potassium inwardly-rectifying channel, subfamily J, member 15                                    |
| 0.0001519 | 0.0004253 | 0.371 | <a href="#">225436_at</a>    | <a href="#">FAM108C1</a> | family with sequence similarity 108, member C1                                                   |
| 0.0001564 | 0.0004313 | 0.371 | <a href="#">211126_s_at</a>  | <a href="#">CSRP2</a>    | cysteine and glycine-rich protein 2                                                              |
| 0.0001135 | 0.0003554 | 0.371 | <a href="#">209950_s_at</a>  | <a href="#">VILL</a>     | villin-like                                                                                      |
| 0.0002525 | 0.0006099 | 0.370 | <a href="#">234980_at</a>    | <a href="#">TMEM56</a>   | transmembrane protein 56                                                                         |
| 5.00E-06  | 7.16E-05  | 0.370 | <a href="#">220161_s_at</a>  | <a href="#">EPB41L4B</a> | erythrocyte membrane protein band 4.1 like 4B                                                    |
| 0.0001903 | 0.0004963 | 0.370 | <a href="#">231969_at</a>    | <a href="#">STOX2</a>    | storkhead box 2                                                                                  |
| 0.0001276 | 0.0003781 | 0.370 | <a href="#">209800_at</a>    | <a href="#">KRT16</a>    | keratin 16                                                                                       |
| 0.0001209 | 0.0003669 | 0.370 | <a href="#">218865_at</a>    | <a href="#">MOSC1</a>    | MOCO sulphurase C-terminal domain containing 1                                                   |
| 0.0009642 | 0.0016233 | 0.369 | <a href="#">230006_s_at</a>  | <a href="#">SVIP</a>     | small VCP/p97-interacting protein                                                                |
| 0.0004486 | 0.000908  | 0.367 | <a href="#">240911_at</a>    | <a href="#">NOS1</a>     | nitric oxide synthase 1 (neuronal)                                                               |
| 6.20E-06  | 7.96E-05  | 0.367 | <a href="#">209581_at</a>    | <a href="#">PLA2G16</a>  | phospholipase A2, group XVI                                                                      |
| 9.94E-05  | 0.0003257 | 0.366 | <a href="#">221664_s_at</a>  | <a href="#">F11R</a>     | F11 receptor                                                                                     |
| 0.0006032 | 0.0011335 | 0.366 | <a href="#">1555829_at</a>   | <a href="#">FAM62B</a>   | family with sequence similarity 62 (C2 domain containing) member B                               |
| 0.0002211 | 0.000553  | 0.365 | <a href="#">222699_s_at</a>  | <a href="#">PLEKHF2</a>  | pleckstrin homology domain containing, family F (with FYVE domain) member 2                      |
| 2.50E-06  | 6.21E-05  | 0.363 | <a href="#">39248_at</a>     | <a href="#">AQP3</a>     | aquaporin 3 (Gill blood group)                                                                   |
| 9.91E-05  | 0.0003257 | 0.363 | <a href="#">226912_at</a>    | <a href="#">ZDHHC23</a>  | zinc finger, DHHC-type containing 23                                                             |
| 1.09E-05  | 9.98E-05  | 0.363 | <a href="#">226817_at</a>    | <a href="#">DSC2</a>     | desmocollin 2                                                                                    |
| 0.0003228 | 0.0007205 | 0.362 | <a href="#">206191_at</a>    | <a href="#">ENTPD3</a>   | ectonucleoside triphosphate diphosphohydrolase 3                                                 |
| 0.0002661 | 0.0006302 | 0.361 | <a href="#">234970_at</a>    | <a href="#">TC2N</a>     | tandem C2 domains, nuclear                                                                       |
| 2.91E-05  | 0.0001641 | 0.361 | <a href="#">229396_at</a>    | <a href="#">OVOL1</a>    | ovo-like 1 (Drosophila)                                                                          |
| 0.0007302 | 0.0013162 | 0.360 | <a href="#">230005_at</a>    | <a href="#">SVIP</a>     | small VCP/p97-interacting protein                                                                |
| 0.0005361 | 0.0010404 | 0.360 | <a href="#">234488_s_at</a>  | <a href="#">GMCL1L</a>   | germ cell-less homolog 1 (Drosophila)-like                                                       |
| 0.0006857 | 0.0012533 | 0.360 | <a href="#">205552_s_at</a>  | <a href="#">OAS1</a>     | 2-5'-oligoadenylate synthetase 1, 40/46kDa                                                       |
| 0.0001881 | 0.0004922 | 0.360 | <a href="#">219132_at</a>    | <a href="#">PELI2</a>    | pellino homolog 2 (Drosophila)                                                                   |
| 1.24E-05  | 0.0001054 | 0.360 | <a href="#">231365_at</a>    | <a href="#">NA</a>       | NA                                                                                               |
| 5.60E-06  | 7.63E-05  | 0.360 | <a href="#">218885_s_at</a>  | <a href="#">GALNT12</a>  | UDP-N-acetyl-alpha-D-galactosamine:polypeptide N-acetylgalactosaminyltransferase 12 (GalNAc-T12) |
| 0.0002111 | 0.0005345 | 0.359 | <a href="#">218960_at</a>    | <a href="#">TMPRSS4</a>  | transmembrane protease, serine 4                                                                 |
| 0.0001619 | 0.0004394 | 0.359 | <a href="#">235955_at</a>    | <a href="#">MARVELD2</a> | MARVEL domain containing 2                                                                       |
| 7.74E-05  | 0.0002827 | 0.359 | <a href="#">224856_at</a>    | <a href="#">FKBP5</a>    | FK506 binding protein 5                                                                          |

|           |           |       |                              |                           |                                                               |
|-----------|-----------|-------|------------------------------|---------------------------|---------------------------------------------------------------|
| 3.22E-05  | 0.0001702 | 0.357 | <a href="#">210119_at</a>    | <a href="#">KCNJ15</a>    | potassium inwardly-rectifying channel, subfamily J, member 15 |
| 0.0006841 | 0.0012514 | 0.357 | <a href="#">219551_at</a>    | <a href="#">EAF2</a>      | ELL associated factor 2                                       |
| 3.43E-05  | 0.0001755 | 0.355 | <a href="#">228865_at</a>    | <a href="#">C1orf116</a>  | chromosome 1 open reading frame 116                           |
| 0.0008605 | 0.0014909 | 0.354 | <a href="#">202525_at</a>    | <a href="#">PRSS8</a>     | protease, serine, 8                                           |
| 3.03E-05  | 0.0001675 | 0.354 | <a href="#">227892_at</a>    | <a href="#">PRKAA2</a>    | protein kinase, AMP-activated, alpha 2 catalytic subunit      |
| 0.0007529 | 0.0013489 | 0.353 | <a href="#">209784_s_at</a>  | <a href="#">JAG2</a>      | jagged 2                                                      |
| 0.0001177 | 0.0003621 | 0.352 | <a href="#">206400_at</a>    | <a href="#">LGALS7</a>    | lectin, galactoside-binding, soluble, 7                       |
| 5.50E-06  | 7.63E-05  | 0.351 | <a href="#">209270_at</a>    | <a href="#">LAMB3</a>     | laminin, beta 3                                               |
| 6.09E-05  | 0.0002416 | 0.350 | <a href="#">1552685_a_at</a> | <a href="#">GRHL1</a>     | grainyhead-like 1 (Drosophila)                                |
| 0.000337  | 0.0007383 | 0.350 | <a href="#">210652_s_at</a>  | <a href="#">TTC39A</a>    | tetratricopeptide repeat domain 39A                           |
| 0.0007819 | 0.0013877 | 0.349 | <a href="#">221245_s_at</a>  | <a href="#">FZD5</a>      | frizzled homolog 5 (Drosophila)                               |
| 6.29E-05  | 0.0002469 | 0.349 | <a href="#">213424_at</a>    | <a href="#">KIAA0895</a>  | KIAA0895                                                      |
| 2.09E-05  | 0.0001362 | 0.349 | <a href="#">228977_at</a>    | <a href="#">LOC729680</a> | hypothetical protein LOC729680                                |
| 4.60E-06  | 7.04E-05  | 0.348 | <a href="#">1555007_s_at</a> | <a href="#">WDR66</a>     | WD repeat domain 66                                           |
| 0.0005537 | 0.0010642 | 0.348 | <a href="#">229225_at</a>    | <a href="#">NRP2</a>      | neuropilin 2                                                  |
| 1.10E-05  | 9.99E-05  | 0.347 | <a href="#">203747_at</a>    | <a href="#">AQP3</a>      | aquaporin 3 (Gill blood group)                                |
| 3.43E-05  | 0.0001755 | 0.347 | <a href="#">211259_s_at</a>  | <a href="#">BMP7</a>      | bone morphogenetic protein 7                                  |
| 0.0001605 | 0.0004372 | 0.347 | <a href="#">205543_at</a>    | <a href="#">HSPA4L</a>    | heat shock 70kDa protein 4-like                               |
| 0.0004597 | 0.0009247 | 0.345 | <a href="#">214203_s_at</a>  | <a href="#">PRODH</a>     | proline dehydrogenase (oxidase) 1                             |
| 0.0001965 | 0.0005049 | 0.345 | <a href="#">242871_at</a>    | <a href="#">PAQR5</a>     | progesterin and adipoQ receptor family member V               |
| 5.90E-06  | 7.80E-05  | 0.344 | <a href="#">45288_at</a>     | <a href="#">ABHD6</a>     | abhydrolase domain containing 6                               |
| 4.80E-06  | 7.05E-05  | 0.344 | <a href="#">201820_at</a>    | <a href="#">KRT5</a>      | keratin 5                                                     |
| 5.90E-05  | 0.0002369 | 0.342 | <a href="#">1552283_s_at</a> | <a href="#">ZDHHC11</a>   | zinc finger, DHHC-type containing 11                          |
| 0.0009312 | 0.001583  | 0.342 | <a href="#">1554835_a_at</a> | <a href="#">B3GNT5</a>    | UDP-GlcNAc:betaGal beta-1,3-N-acetylglucosaminyltransferase 5 |
| 6.13E-05  | 0.0002423 | 0.341 | <a href="#">213456_at</a>    | <a href="#">SOSTDC1</a>   | sclerostin domain containing 1                                |
| 0.0002062 | 0.0005238 | 0.341 | <a href="#">221552_at</a>    | <a href="#">ABHD6</a>     | abhydrolase domain containing 6                               |
| 5.83E-05  | 0.0002354 | 0.340 | <a href="#">223704_s_at</a>  | <a href="#">DMRT2</a>     | doublesex and mab-3 related transcription factor 2            |
| 0.000136  | 0.0003955 | 0.339 | <a href="#">204039_at</a>    | <a href="#">CEBPA</a>     | CCAAT/enhancer binding protein (C/EBP), alpha                 |
| 5.96E-05  | 0.0002381 | 0.338 | <a href="#">210136_at</a>    | <a href="#">MBP</a>       | myelin basic protein                                          |
| 1.15E-05  | 0.0001021 | 0.337 | <a href="#">1559606_at</a>   | <a href="#">GBP6</a>      | guanylate binding protein family, member 6                    |
| 0.000225  | 0.0005603 | 0.337 | <a href="#">32137_at</a>     | <a href="#">JAG2</a>      | jagged 2                                                      |
| 3.26E-05  | 0.0001706 | 0.337 | <a href="#">203836_s_at</a>  | <a href="#">MAP3K5</a>    | mitogen-activated protein kinase kinase kinase 5              |
| 5.31E-05  | 0.0002223 | 0.336 | <a href="#">233252_s_at</a>  | <a href="#">STRBP</a>     | spermatid perinuclear RNA binding protein                     |
| 8.30E-06  | 8.89E-05  | 0.336 | <a href="#">226068_at</a>    | <a href="#">SYK</a>       | spleen tyrosine kinase                                        |
| 0.0006144 | 0.0011481 | 0.336 | <a href="#">213974_at</a>    | <a href="#">ADAMTSL3</a>  | ADAMTS-like 3                                                 |
| 0.0007214 | 0.0013038 | 0.335 | <a href="#">228241_at</a>    | <a href="#">AGR3</a>      | anterior gradient homolog 3 (Xenopus laevis)                  |
| 1.50E-06  | 5.65E-05  | 0.335 | <a href="#">202890_at</a>    | <a href="#">MAP7</a>      | microtubule-associated protein 7                              |
| 9.56E-05  | 0.0003183 | 0.333 | <a href="#">237063_at</a>    | <a href="#">NA</a>        | NA                                                            |
| 0.0001402 | 0.0004016 | 0.333 | <a href="#">212978_at</a>    | <a href="#">LRRC8B</a>    | leucine rich repeat containing 8 family, member B             |
| 3.75E-05  | 0.0001827 | 0.331 | <a href="#">211401_s_at</a>  | <a href="#">FGFR2</a>     | fibroblast growth factor receptor 2                           |
| 5.60E-06  | 7.63E-05  | 0.331 | <a href="#">219756_s_at</a>  | <a href="#">POF1B</a>     | premature ovarian failure, 1B                                 |
| 0.0001227 | 0.0003687 | 0.330 | <a href="#">213100_at</a>    | <a href="#">UNC5B</a>     | unc-5 homolog B (C. elegans)                                  |
| 7.82E-05  | 0.0002843 | 0.330 | <a href="#">226863_at</a>    | <a href="#">FAM110C</a>   | family with sequence similarity 110, member C                 |

|           |           |       |                              |                           |                                                                        |
|-----------|-----------|-------|------------------------------|---------------------------|------------------------------------------------------------------------|
| 3.30E-06  | 6.60E-05  | 0.330 | <a href="#">218559_s_at</a>  | <a href="#">MAFB</a>      | v-maf musculoaponeurotic fibrosarcoma oncogene homolog B (avian)       |
| 0.000425  | 0.0008728 | 0.329 | <a href="#">213285_at</a>    | <a href="#">TMEM30B</a>   | transmembrane protein 30B                                              |
| 0.0001568 | 0.0004313 | 0.327 | <a href="#">225822_at</a>    | <a href="#">TMEM125</a>   | transmembrane protein 125                                              |
| 0.000445  | 0.0009048 | 0.327 | <a href="#">229546_at</a>    | <a href="#">LOC653602</a> | hypothetical LOC653602                                                 |
| 7.36E-05  | 0.0002733 | 0.326 | <a href="#">1566764_at</a>   | <a href="#">MACC1</a>     | metastasis associated in colon cancer 1                                |
| 3.80E-05  | 0.0001836 | 0.326 | <a href="#">213030_s_at</a>  | <a href="#">PLXNA2</a>    | plexin A2                                                              |
| 0.0001361 | 0.0003955 | 0.326 | <a href="#">212966_at</a>    | <a href="#">HIC2</a>      | hypermethylated in cancer 2                                            |
| 2.54E-05  | 0.0001515 | 0.325 | <a href="#">235651_at</a>    | NA                        | NA                                                                     |
| 0.0001056 | 0.0003374 | 0.324 | <a href="#">226302_at</a>    | <a href="#">ATP8B1</a>    | ATPase, class I, type 8B, member 1                                     |
| 1.43E-05  | 0.000113  | 0.324 | <a href="#">235683_at</a>    | <a href="#">SESN3</a>     | sestrin 3                                                              |
| 0.0003962 | 0.0008324 | 0.324 | <a href="#">208084_at</a>    | <a href="#">ITGB6</a>     | integrin, beta 6                                                       |
| 5.27E-05  | 0.0002219 | 0.322 | <a href="#">219856_at</a>    | <a href="#">C1orf116</a>  | chromosome 1 open reading frame 116                                    |
| 0.0008863 | 0.0015239 | 0.321 | <a href="#">227803_at</a>    | <a href="#">ENPP5</a>     | ectonucleotide pyrophosphatase/phosphodiesterase 5 (putative function) |
| 0.0001561 | 0.0004313 | 0.321 | <a href="#">218813_s_at</a>  | <a href="#">SH3GLB2</a>   | SH3-domain GRB2-like endophilin B2                                     |
| 0.000336  | 0.0007369 | 0.320 | <a href="#">205180_s_at</a>  | <a href="#">ADAM8</a>     | ADAM metallopeptidase domain 8                                         |
| 0.0008279 | 0.0014499 | 0.319 | <a href="#">210505_at</a>    | <a href="#">ADH7</a>      | alcohol dehydrogenase 7 (class IV), mu or sigma polypeptide            |
| 3.10E-05  | 0.0001676 | 0.318 | <a href="#">204351_at</a>    | <a href="#">S100P</a>     | S100 calcium binding protein P                                         |
| 8.38E-05  | 0.0002992 | 0.318 | <a href="#">204503_at</a>    | <a href="#">EVPL</a>      | envoplakin                                                             |
| 7.20E-06  | 8.26E-05  | 0.317 | <a href="#">231381_at</a>    | <a href="#">HESRG</a>     | hypothetical LOC790952                                                 |
| 3.53E-05  | 0.0001774 | 0.317 | <a href="#">223246_s_at</a>  | <a href="#">STRBP</a>     | spermatid perinuclear RNA binding protein                              |
| 2.00E-07  | 3.57E-05  | 0.316 | <a href="#">204734_at</a>    | <a href="#">KRT15</a>     | keratin 15                                                             |
| 2.37E-05  | 0.0001452 | 0.316 | <a href="#">227241_at</a>    | <a href="#">MUC15</a>     | mucin 15, cell surface associated                                      |
| 9.69E-05  | 0.0003208 | 0.316 | <a href="#">220318_at</a>    | <a href="#">EPN3</a>      | epsin 3                                                                |
| 9.40E-06  | 9.40E-05  | 0.314 | <a href="#">1554921_a_at</a> | <a href="#">SCEL</a>      | sciellin                                                               |
| 0.0005485 | 0.0010573 | 0.314 | <a href="#">200841_s_at</a>  | <a href="#">EPRS</a>      | glutamyl-prolyl-tRNA synthetase                                        |
| 1.40E-05  | 0.0001122 | 0.314 | <a href="#">221646_s_at</a>  | <a href="#">ZDHC11</a>    | zinc finger, DHHC-type containing 11                                   |
| 0.0002603 | 0.0006208 | 0.314 | <a href="#">228485_s_at</a>  | <a href="#">SLC44A1</a>   | solute carrier family 44, member 1                                     |
| 7.31E-05  | 0.0002718 | 0.314 | <a href="#">227461_at</a>    | <a href="#">STON2</a>     | stonin 2                                                               |
| 1.84E-05  | 0.000128  | 0.313 | <a href="#">226278_at</a>    | <a href="#">SVIP</a>      | small VCP/p97-interacting protein                                      |
| 0.0001164 | 0.0003595 | 0.313 | <a href="#">235150_at</a>    | NA                        | NA                                                                     |
| 0.0005135 | 0.0010122 | 0.313 | <a href="#">228221_at</a>    | <a href="#">SLC44A3</a>   | solute carrier family 44, member 3                                     |
| 0.0001405 | 0.0004016 | 0.313 | <a href="#">219648_at</a>    | <a href="#">MREG</a>      | melanoregulin                                                          |
| 0.0002124 | 0.0005366 | 0.312 | <a href="#">208153_s_at</a>  | <a href="#">FAT2</a>      | FAT tumor suppressor homolog 2 (Drosophila)                            |
| 0.0002665 | 0.0006302 | 0.311 | <a href="#">205769_at</a>    | <a href="#">SLC27A2</a>   | solute carrier family 27 (fatty acid transporter), member 2            |
| 9.50E-06  | 9.41E-05  | 0.311 | <a href="#">205595_at</a>    | <a href="#">DSG3</a>      | desmoglein 3 (pemphigus vulgaris antigen)                              |
| 6.49E-05  | 0.0002534 | 0.311 | <a href="#">218693_at</a>    | <a href="#">TSPAN15</a>   | tetraspanin 15                                                         |
| 0.0002969 | 0.0006817 | 0.310 | <a href="#">233251_at</a>    | <a href="#">STRBP</a>     | spermatid perinuclear RNA binding protein                              |
| 0.0002497 | 0.0006074 | 0.310 | <a href="#">219976_at</a>    | <a href="#">HOOK1</a>     | hook homolog 1 (Drosophila)                                            |
| 4.16E-05  | 0.0001923 | 0.309 | <a href="#">222150_s_at</a>  | <a href="#">PION</a>      | pigeon homolog (Drosophila)                                            |
| 4.20E-06  | 6.83E-05  | 0.308 | <a href="#">223075_s_at</a>  | <a href="#">AIF1L</a>     | allograft inflammatory factor 1-like                                   |
| 3.60E-06  | 6.75E-05  | 0.308 | <a href="#">225864_at</a>    | <a href="#">FAM84B</a>    | family with sequence similarity 84, member B                           |
| 0.0003606 | 0.0007758 | 0.308 | <a href="#">235247_at</a>    | NA                        | NA                                                                     |
| 2.70E-06  | 6.21E-05  | 0.307 | <a href="#">212070_at</a>    | <a href="#">GPR56</a>     | G protein-coupled receptor 56                                          |

|           |           |       |                              |                            |                                                                                                              |
|-----------|-----------|-------|------------------------------|----------------------------|--------------------------------------------------------------------------------------------------------------|
| 3.00E-07  | 3.57E-05  | 0.307 | <a href="#">209283_at</a>    | <a href="#">CRYAB</a>      | crystallin, alpha B                                                                                          |
| 0.0003593 | 0.0007737 | 0.307 | <a href="#">218807_at</a>    | <a href="#">VAV3</a>       | vav 3 guanine nucleotide exchange factor                                                                     |
| 0.0001247 | 0.0003721 | 0.307 | <a href="#">205032_at</a>    | <a href="#">ITGA2</a>      | integrin, alpha 2 (CD49B, alpha 2 subunit of VLA-2 receptor)                                                 |
| 6.80E-06  | 8.13E-05  | 0.306 | <a href="#">205559_s_at</a>  | <a href="#">PCSK5</a>      | proprotein convertase subtilisin/kexin type 5                                                                |
| 4.10E-06  | 6.82E-05  | 0.305 | <a href="#">206276_at</a>    | <a href="#">LY6D</a>       | lymphocyte antigen 6 complex, locus D                                                                        |
| 0.0007369 | 0.0013255 | 0.305 | <a href="#">232122_s_at</a>  | <a href="#">VEPH1</a>      | ventricular zone expressed PH domain homolog 1 (zebrafish)                                                   |
| 1.80E-06  | 5.65E-05  | 0.304 | <a href="#">205603_s_at</a>  | <a href="#">DIAPH2</a>     | diaphanous homolog 2 (Drosophila)                                                                            |
| 0.0005899 | 0.0011161 | 0.304 | <a href="#">214545_s_at</a>  | <a href="#">PROSC</a>      | proline synthetase co-transcribed homolog (bacterial)                                                        |
| 0.0001102 | 0.0003475 | 0.303 | <a href="#">227717_at</a>    | <a href="#">FLJ41603</a>   | FLJ41603 protein                                                                                             |
| 0.000135  | 0.0003939 | 0.303 | <a href="#">212315_s_at</a>  | <a href="#">NUP210</a>     | nucleoporin 210kDa                                                                                           |
| 0.0005604 | 0.0010733 | 0.302 | <a href="#">205184_at</a>    | <a href="#">GNG4</a>       | guanine nucleotide binding protein (G protein), gamma 4                                                      |
| 0.0003798 | 0.0008063 | 0.301 | <a href="#">207655_s_at</a>  | <a href="#">BLNK</a>       | B-cell linker                                                                                                |
| 0.000836  | 0.0014585 | 0.301 | <a href="#">211194_s_at</a>  | <a href="#">TP63</a>       | tumor protein p63                                                                                            |
| 4.09E-05  | 0.0001895 | 0.301 | <a href="#">215471_s_at</a>  | <a href="#">MAP7</a>       | microtubule-associated protein 7                                                                             |
| 0.0009566 | 0.0016189 | 0.300 | <a href="#">215785_s_at</a>  | <a href="#">CYFIP2</a>     | cytoplasmic FMR1 interacting protein 2                                                                       |
| 2.14E-05  | 0.0001386 | 0.300 | <a href="#">228360_at</a>    | <a href="#">LYPD6B</a>     | LY6/PLAUR domain containing 6B                                                                               |
| 7.20E-06  | 8.26E-05  | 0.299 | <a href="#">205780_at</a>    | <a href="#">BIK</a>        | BCL2-interacting killer (apoptosis-inducing)                                                                 |
| 0.0004706 | 0.00094   | 0.298 | <a href="#">206204_at</a>    | <a href="#">GRB14</a>      | growth factor receptor-bound protein 14                                                                      |
| 5.69E-05  | 0.0002314 | 0.298 | <a href="#">223895_s_at</a>  | <a href="#">EPN3</a>       | epsin 3                                                                                                      |
| 0.0008529 | 0.0014801 | 0.298 | <a href="#">1553132_a_at</a> | <a href="#">TC2N</a>       | tandem C2 domains, nuclear                                                                                   |
| 1.80E-06  | 5.65E-05  | 0.298 | <a href="#">213947_s_at</a>  | <a href="#">NUP210</a>     | nucleoporin 210kDa                                                                                           |
| 0.000107  | 0.0003393 | 0.297 | <a href="#">227314_at</a>    | <a href="#">ITGA2</a>      | integrin, alpha 2 (CD49B, alpha 2 subunit of VLA-2 receptor)                                                 |
| 3.10E-05  | 0.0001676 | 0.297 | <a href="#">220196_at</a>    | <a href="#">MUC16</a>      | mucin 16, cell surface associated                                                                            |
| 1.20E-06  | 5.65E-05  | 0.296 | <a href="#">217995_at</a>    | <a href="#">SQRD1</a>      | sulfide quinone reductase-like (yeast)                                                                       |
| 0.0002437 | 0.0005981 | 0.296 | <a href="#">203780_at</a>    | <a href="#">MPZL2</a>      | myelin protein zero-like 2                                                                                   |
| 4.10E-06  | 6.82E-05  | 0.296 | <a href="#">238029_s_at</a>  | <a href="#">SLC16A14</a>   | solute carrier family 16, member 14 (monocarboxylic acid transporter 14)                                     |
| 0.0003516 | 0.0007644 | 0.296 | <a href="#">219503_s_at</a>  | <a href="#">TMEM40</a>     | transmembrane protein 40                                                                                     |
| 4.00E-05  | 0.0001892 | 0.296 | <a href="#">226405_s_at</a>  | <a href="#">ARRDC1</a>     | arrestin domain containing 1                                                                                 |
| 3.51E-05  | 0.0001774 | 0.293 | <a href="#">202350_s_at</a>  | <a href="#">MATN2</a>      | matrilin 2                                                                                                   |
| 9.70E-06  | 9.41E-05  | 0.293 | <a href="#">225613_at</a>    | <a href="#">MAST4</a>      | microtubule associated serine/threonine kinase family member 4                                               |
| 0.0001195 | 0.0003661 | 0.293 | <a href="#">239862_at</a>    | <a href="#">NA</a>         | NA                                                                                                           |
| 0.0001232 | 0.0003692 | 0.293 | <a href="#">1554006_a_at</a> | <a href="#">LLGL2</a>      | lethal giant larvae homolog 2 (Drosophila)                                                                   |
| 0.0003217 | 0.0007187 | 0.291 | <a href="#">209925_at</a>    | <a href="#">OCLN</a>       | occludin                                                                                                     |
| 0.0003352 | 0.0007358 | 0.291 | <a href="#">223235_s_at</a>  | <a href="#">SMOC2</a>      | SPARC related modular calcium binding 2                                                                      |
| 3.27E-05  | 0.0001707 | 0.290 | <a href="#">228570_at</a>    | <a href="#">BTBD11</a>     | BTB (POZ) domain containing 11                                                                               |
| 9.42E-05  | 0.000316  | 0.290 | <a href="#">240921_at</a>    | <a href="#">NA</a>         | NA                                                                                                           |
| 0.0003282 | 0.0007261 | 0.289 | <a href="#">227725_at</a>    | <a href="#">ST6GALNAC1</a> | ST6 (alpha-N-acetyl-neuraminy-2,3-beta-galactosyl-1,3)-N-acetylgalactosaminide alpha-2,6-sialyltransferase 1 |
| 0.0005851 | 0.0011089 | 0.289 | <a href="#">216521_s_at</a>  | <a href="#">BRCC3</a>      | BRCA1/BRCA2-containing complex, subunit 3                                                                    |
| 0.0008453 | 0.0014713 | 0.287 | <a href="#">1555330_at</a>   | <a href="#">GCLC</a>       | glutamate-cysteine ligase, catalytic subunit                                                                 |
| 0.0004054 | 0.0008454 | 0.287 | <a href="#">202688_at</a>    | <a href="#">TNFSF10</a>    | tumor necrosis factor (ligand) superfamily, member 10                                                        |
| 3.25E-05  | 0.0001705 | 0.286 | <a href="#">207540_s_at</a>  | <a href="#">SYK</a>        | spleen tyrosine kinase                                                                                       |
| 0.0002549 | 0.0006136 | 0.284 | <a href="#">202488_s_at</a>  | <a href="#">FXD3</a>       | FXD domain containing ion transport regulator 3                                                              |

|           |           |       |                             |                          |                                                                                                  |
|-----------|-----------|-------|-----------------------------|--------------------------|--------------------------------------------------------------------------------------------------|
| 1.91E-05  | 0.0001292 | 0.284 | <a href="#">203638 s at</a> | <a href="#">FGFR2</a>    | fibroblast growth factor receptor 2                                                              |
| 2.27E-05  | 0.0001414 | 0.284 | <a href="#">213142 x at</a> | <a href="#">PION</a>     | pigeon homolog (Drosophila)                                                                      |
| 0.0001297 | 0.0003828 | 0.283 | <a href="#">219938 s at</a> | <a href="#">PSTPIP2</a>  | proline-serine-threonine phosphatase interacting protein 2                                       |
| 0.0001578 | 0.0004327 | 0.283 | <a href="#">242626 at</a>   | <a href="#">SAMDS5</a>   | sterile alpha motif domain containing 5                                                          |
| 3.10E-06  | 6.55E-05  | 0.281 | <a href="#">232202 at</a>   | <a href="#">NA</a>       | NA                                                                                               |
| 0.0002668 | 0.0006302 | 0.281 | <a href="#">243546 at</a>   | <a href="#">NA</a>       | NA                                                                                               |
| 0.0006716 | 0.0012325 | 0.281 | <a href="#">242053 at</a>   | <a href="#">TSGA10</a>   | testis specific, 10                                                                              |
| 0.0009559 | 0.0016189 | 0.280 | <a href="#">234730 s at</a> | <a href="#">RIPK4</a>    | receptor-interacting serine-threonine kinase 4                                                   |
| 0.0003057 | 0.000694  | 0.280 | <a href="#">213652 at</a>   | <a href="#">PCSK5</a>    | proprotein convertase subtilisin/kexin type 5                                                    |
| 0.0008101 | 0.0014232 | 0.280 | <a href="#">209098 s at</a> | <a href="#">JAG1</a>     | jagged 1 (Alagille syndrome)                                                                     |
| 7.40E-06  | 8.32E-05  | 0.280 | <a href="#">217979 at</a>   | <a href="#">TSPAN13</a>  | tetraspanin 13                                                                                   |
| 4.00E-06  | 6.75E-05  | 0.278 | <a href="#">229901 at</a>   | <a href="#">ZNF488</a>   | zinc finger protein 488                                                                          |
| 4.41E-05  | 0.000196  | 0.278 | <a href="#">214598 at</a>   | <a href="#">CLDN8</a>    | claudin 8                                                                                        |
| 0.0005612 | 0.0010735 | 0.277 | <a href="#">229842 at</a>   | <a href="#">ELF3</a>     | E74-like factor 3 (ets domain transcription factor, epithelial-specific )                        |
| 0.0003038 | 0.0006915 | 0.277 | <a href="#">228557 at</a>   | <a href="#">L3MBTL4</a>  | l(3)mbt-like 4 (Drosophila)                                                                      |
| 0.0003204 | 0.0007174 | 0.277 | <a href="#">1553986 at</a>  | <a href="#">RASEF</a>    | RAS and EF-hand domain containing                                                                |
| 0.0001037 | 0.000333  | 0.275 | <a href="#">202889 x at</a> | <a href="#">MAP7</a>     | microtubule-associated protein 7                                                                 |
| 1.62E-05  | 0.00012   | 0.275 | <a href="#">235144 at</a>   | <a href="#">NA</a>       | NA                                                                                               |
| 2.73E-05  | 0.0001567 | 0.275 | <a href="#">212992 at</a>   | <a href="#">AHNAK2</a>   | AHNAK nucleoprotein 2                                                                            |
| 0.0005312 | 0.0010336 | 0.274 | <a href="#">244418 at</a>   | <a href="#">NA</a>       | NA                                                                                               |
| 0.0001233 | 0.0003692 | 0.273 | <a href="#">231195 at</a>   | <a href="#">KLRG2</a>    | killer cell lectin-like receptor subfamily G, member 2                                           |
| 0.0002529 | 0.0006103 | 0.273 | <a href="#">235744 at</a>   | <a href="#">PPTC7</a>    | PTC7 protein phosphatase homolog (S. cerevisiae)                                                 |
| 4.79E-05  | 0.0002075 | 0.271 | <a href="#">225016 at</a>   | <a href="#">APCDD1</a>   | adenomatosis polyposis coli down-regulated 1                                                     |
| 0.0005079 | 0.0010038 | 0.270 | <a href="#">225140 at</a>   | <a href="#">KLF3</a>     | Kruppel-like factor 3 (basic)                                                                    |
| 0.0009976 | 0.0016683 | 0.269 | <a href="#">219714 s at</a> | <a href="#">CACNA2D3</a> | calcium channel, voltage-dependent, alpha 2/delta subunit 3                                      |
| 0.000515  | 0.0010129 | 0.268 | <a href="#">201008 s at</a> | <a href="#">TXNIP</a>    | thioredoxin interacting protein                                                                  |
| 1.70E-06  | 5.65E-05  | 0.268 | <a href="#">201131 s at</a> | <a href="#">CDH1</a>     | cadherin 1, type 1, E-cadherin (epithelial)                                                      |
| 9.10E-06  | 9.35E-05  | 0.268 | <a href="#">214580 x at</a> | <a href="#">KRT6A</a>    | keratin 6A                                                                                       |
| 3.30E-05  | 0.0001711 | 0.267 | <a href="#">219395 at</a>   | <a href="#">RBM35B</a>   | RNA binding motif protein 35B                                                                    |
| 8.91E-05  | 0.0003076 | 0.267 | <a href="#">222773 s at</a> | <a href="#">GALNT12</a>  | UDP-N-acetyl-alpha-D-galactosamine:polypeptide N-acetylgalactosaminyltransferase 12 (GalNAc-T12) |
| 9.01E-05  | 0.0003095 | 0.267 | <a href="#">244023 at</a>   | <a href="#">SYK</a>      | spleen tyrosine kinase                                                                           |
| 0.0001926 | 0.0004994 | 0.265 | <a href="#">218806 s at</a> | <a href="#">VAV3</a>     | vav 3 guanine nucleotide exchange factor                                                         |
| 0.0002578 | 0.0006181 | 0.264 | <a href="#">230964 at</a>   | <a href="#">FREM2</a>    | FRAS1 related extracellular matrix protein 2                                                     |
| 0.0001479 | 0.0004154 | 0.264 | <a href="#">220035 at</a>   | <a href="#">NUP210</a>   | nucleoporin 210kDa                                                                               |
| 0.0008713 | 0.0015061 | 0.264 | <a href="#">1569433 at</a>  | <a href="#">SAMDS5</a>   | sterile alpha motif domain containing 5                                                          |
| 3.47E-05  | 0.0001767 | 0.264 | <a href="#">39249 at</a>    | <a href="#">AQP3</a>     | aquaporin 3 (Gill blood group)                                                                   |
| 3.28E-05  | 0.0001709 | 0.263 | <a href="#">203397 s at</a> | <a href="#">GALNT3</a>   | UDP-N-acetyl-alpha-D-galactosamine:polypeptide N-acetylgalactosaminyltransferase 3 (GalNAc-T3)   |
| 1.26E-05  | 0.0001063 | 0.263 | <a href="#">204019 s at</a> | <a href="#">SH3YL1</a>   | SH3 domain containing, Ysc84-like 1 (S. cerevisiae)                                              |
| 2.80E-06  | 6.21E-05  | 0.262 | <a href="#">202712 s at</a> | <a href="#">CKMT1B</a>   | creatine kinase, mitochondrial 1B                                                                |
| 6.82E-05  | 0.00026   | 0.261 | <a href="#">223709 s at</a> | <a href="#">WNT10A</a>   | wingless-type MMTV integration site family, member 10A                                           |
| 5.92E-05  | 0.0002373 | 0.261 | <a href="#">219121 s at</a> | <a href="#">RBM35A</a>   | RNA binding motif protein 35A                                                                    |
| 9.00E-07  | 5.36E-05  | 0.261 | <a href="#">201015 s at</a> | <a href="#">JUP</a>      | junction plakoglobin                                                                             |
| 9.50E-05  | 0.0003168 | 0.261 | <a href="#">215425 at</a>   | <a href="#">BTG3</a>     | BTG family, member 3                                                                             |

|           |           |       |                              |                          |                                                                               |
|-----------|-----------|-------|------------------------------|--------------------------|-------------------------------------------------------------------------------|
| 0.0006374 | 0.0011799 | 0.260 | <a href="#">227935 s at</a>  | <a href="#">PCGF5</a>    | polycomb group ring finger 5                                                  |
| 4.58E-05  | 0.0002011 | 0.260 | <a href="#">1553319 at</a>   | <a href="#">OXGR1</a>    | oxoglutarate (alpha-ketoglutarate) receptor 1                                 |
| 9.50E-06  | 9.41E-05  | 0.260 | <a href="#">205625 s at</a>  | <a href="#">CALB1</a>    | calbindin 1, 28kDa                                                            |
| 0.000279  | 0.0006503 | 0.259 | <a href="#">228494 at</a>    | <a href="#">PPP1R9A</a>  | protein phosphatase 1, regulatory (inhibitor) subunit 9A                      |
| 0.0005498 | 0.0010589 | 0.258 | <a href="#">209269 s at</a>  | <a href="#">SYK</a>      | spleen tyrosine kinase                                                        |
| 5.64E-05  | 0.000231  | 0.256 | <a href="#">239148 at</a>    | <a href="#">MARVELD3</a> | MARVEL domain containing 3                                                    |
| 4.42E-05  | 0.000196  | 0.256 | <a href="#">227506 at</a>    | <a href="#">SLC16A9</a>  | solute carrier family 16, member 9 (monocarboxylic acid transporter 9)        |
| 0.0001238 | 0.0003703 | 0.255 | <a href="#">218804 at</a>    | <a href="#">ANO1</a>     | anoctamin 1, calcium activated chloride channel                               |
| 1.99E-05  | 0.0001322 | 0.255 | <a href="#">222892 s at</a>  | <a href="#">TMEM40</a>   | transmembrane protein 40                                                      |
| 6.30E-06  | 7.96E-05  | 0.254 | <a href="#">231849 at</a>    | <a href="#">KRT80</a>    | keratin 80                                                                    |
| 5.61E-05  | 0.000231  | 0.254 | <a href="#">212657 s at</a>  | <a href="#">IL1RN</a>    | interleukin 1 receptor antagonist                                             |
| 0.0001454 | 0.0004099 | 0.254 | <a href="#">229242 at</a>    | <a href="#">NA</a>       | NA                                                                            |
| 2.10E-06  | 5.78E-05  | 0.251 | <a href="#">205626 s at</a>  | <a href="#">CALB1</a>    | calbindin 1, 28kDa                                                            |
| 0.0001531 | 0.0004279 | 0.251 | <a href="#">201428 at</a>    | <a href="#">CLDN4</a>    | claudin 4                                                                     |
| 2.00E-05  | 0.0001322 | 0.250 | <a href="#">202489 s at</a>  | <a href="#">FXVD3</a>    | FXVD domain containing ion transport regulator 3                              |
| 3.43E-05  | 0.0001755 | 0.250 | <a href="#">1553613 s at</a> | <a href="#">FOXC1</a>    | forkhead box C1                                                               |
| 6.98E-05  | 0.000263  | 0.247 | <a href="#">224646 x at</a>  | <a href="#">H19</a>      | H19, imprinted maternally expressed transcript (non-protein coding)           |
| 1.90E-06  | 5.65E-05  | 0.246 | <a href="#">201690 s at</a>  | <a href="#">TPD52</a>    | tumor protein D52                                                             |
| 1.57E-05  | 0.0001187 | 0.246 | <a href="#">221679 s at</a>  | <a href="#">ABHD6</a>    | abhydrolase domain containing 6                                               |
| 0.0003339 | 0.0007351 | 0.246 | <a href="#">223832 s at</a>  | <a href="#">CAPNS2</a>   | calpain, small subunit 2                                                      |
| 1.35E-05  | 0.000111  | 0.244 | <a href="#">242786 at</a>    | <a href="#">NA</a>       | NA                                                                            |
| 0.0001025 | 0.0003311 | 0.243 | <a href="#">1552496 a at</a> | <a href="#">COBL</a>     | cordon-bleu homolog (mouse)                                                   |
| 0.0005921 | 0.001119  | 0.241 | <a href="#">1555269 a at</a> | <a href="#">ANO1</a>     | anoctamin 1, calcium activated chloride channel                               |
| 0.000775  | 0.0013794 | 0.241 | <a href="#">209114 at</a>    | <a href="#">TSPAN1</a>   | tetraspanin 1                                                                 |
| 0.0001143 | 0.000357  | 0.241 | <a href="#">239595 at</a>    | <a href="#">GPX2</a>     | glutathione peroxidase 2 (gastrointestinal)                                   |
| 0.0009593 | 0.0016209 | 0.240 | <a href="#">204989 s at</a>  | <a href="#">ITGB4</a>    | integrin, beta 4                                                              |
| 3.20E-06  | 6.60E-05  | 0.240 | <a href="#">201079 at</a>    | <a href="#">SYNGR2</a>   | synaptogyrin 2                                                                |
| 2.26E-05  | 0.0001414 | 0.239 | <a href="#">225325 at</a>    | <a href="#">MFSD6</a>    | major facilitator superfamily domain containing 6                             |
| 2.70E-06  | 6.21E-05  | 0.238 | <a href="#">212316 at</a>    | <a href="#">NUP210</a>   | nucleoporin 210kDa                                                            |
| 4.42E-05  | 0.000196  | 0.238 | <a href="#">231311 at</a>    | <a href="#">NA</a>       | NA                                                                            |
| 8.43E-05  | 0.0002992 | 0.237 | <a href="#">215729 s at</a>  | <a href="#">VGLL1</a>    | vestigial like 1 (Drosophila)                                                 |
| 8.70E-06  | 9.19E-05  | 0.237 | <a href="#">203407 at</a>    | <a href="#">PPL</a>      | periplakin                                                                    |
| 9.40E-06  | 9.40E-05  | 0.237 | <a href="#">212096 s at</a>  | <a href="#">MTUS1</a>    | mitochondrial tumor suppressor 1                                              |
| 2.20E-06  | 5.78E-05  | 0.237 | <a href="#">211002 s at</a>  | <a href="#">TRIM29</a>   | tripartite motif-containing 29                                                |
| 1.03E-05  | 9.66E-05  | 0.236 | <a href="#">203642 s at</a>  | <a href="#">COBLL1</a>   | COBL-like 1                                                                   |
| 1.65E-05  | 0.0001203 | 0.235 | <a href="#">208228 s at</a>  | <a href="#">FGFR2</a>    | fibroblast growth factor receptor 2                                           |
| 4.30E-06  | 6.90E-05  | 0.235 | <a href="#">202800 at</a>    | <a href="#">SLC1A3</a>   | solute carrier family 1 (glial high affinity glutamate transporter), member 3 |
| 0.0006708 | 0.0012321 | 0.235 | <a href="#">213722 at</a>    | <a href="#">SOX2</a>     | SRY (sex determining region Y)-box 2                                          |
| 0.0004323 | 0.0008838 | 0.235 | <a href="#">201510 at</a>    | <a href="#">ELF3</a>     | E74-like factor 3 (ets domain transcription factor, epithelial-specific)      |
| 9.33E-05  | 0.0003143 | 0.233 | <a href="#">229223 at</a>    | <a href="#">NA</a>       | NA                                                                            |
| 1.65E-05  | 0.0001203 | 0.230 | <a href="#">228256 s at</a>  | <a href="#">EPB41L4A</a> | erythrocyte membrane protein band 4.1 like 4A                                 |
| 8.71E-05  | 0.0003039 | 0.230 | <a href="#">227238 at</a>    | <a href="#">MUC15</a>    | mucin 15, cell surface associated                                             |
| 8.60E-06  | 9.17E-05  | 0.228 | <a href="#">225301 s at</a>  | <a href="#">MYO5B</a>    | myosin VB                                                                     |

|           |           |       |                              |                          |                                                                                                                  |
|-----------|-----------|-------|------------------------------|--------------------------|------------------------------------------------------------------------------------------------------------------|
| 0.0008242 | 0.0014446 | 0.227 | <a href="#">225911 at</a>    | <a href="#">NPNT</a>     | nephronectin                                                                                                     |
| 0.000538  | 0.0010423 | 0.226 | <a href="#">205185 at</a>    | <a href="#">SPINK5</a>   | serine peptidase inhibitor, Kazal type 5                                                                         |
| 5.11E-05  | 0.0002176 | 0.226 | <a href="#">1555516 at</a>   | <a href="#">FOXP2</a>    | forkhead box P2                                                                                                  |
| 1.14E-05  | 0.0001021 | 0.226 | <a href="#">202504 at</a>    | <a href="#">TRIM29</a>   | tripartite motif-containing 29                                                                                   |
| 2.08E-05  | 0.0001359 | 0.226 | <a href="#">232165 at</a>    | <a href="#">EPPK1</a>    | epiplakin 1                                                                                                      |
| 8.00E-07  | 5.36E-05  | 0.225 | <a href="#">228038 at</a>    | <a href="#">SOX2</a>     | SRY (sex determining region Y)-box 2                                                                             |
| 0.0004543 | 0.0009147 | 0.223 | <a href="#">203639 s at</a>  | <a href="#">FGFR2</a>    | fibroblast growth factor receptor 2                                                                              |
| 7.00E-07  | 5.36E-05  | 0.222 | <a href="#">229568 at</a>    | <a href="#">MOBKL2B</a>  | MOB1, Mps One Binder kinase activator-like 2B (yeast)                                                            |
| 3.81E-05  | 0.0001837 | 0.221 | <a href="#">242836 at</a>    | <a href="#">NA</a>       | NA                                                                                                               |
| 2.00E-05  | 0.0001322 | 0.220 | <a href="#">210827 s at</a>  | <a href="#">ELF3</a>     | E74-like factor 3 (ets domain transcription factor, epithelial-specific )                                        |
| 0.0005924 | 0.001119  | 0.220 | <a href="#">223427 s at</a>  | <a href="#">EPB41L4B</a> | erythrocyte membrane protein band 4.1 like 4B                                                                    |
| 0.0004079 | 0.0008484 | 0.219 | <a href="#">213707 s at</a>  | <a href="#">DLX5</a>     | distal-less homeobox 5                                                                                           |
| 0.0001164 | 0.0003595 | 0.218 | <a href="#">227209 at</a>    | <a href="#">CNTN1</a>    | contactin 1                                                                                                      |
| 0.0001035 | 0.0003329 | 0.218 | <a href="#">226844 at</a>    | <a href="#">MOBKL2B</a>  | MOB1, Mps One Binder kinase activator-like 2B (yeast)                                                            |
| 0.0001139 | 0.0003562 | 0.216 | <a href="#">202005 at</a>    | <a href="#">ST14</a>     | suppression of tumorigenicity 14 (colon carcinoma)                                                               |
| 0.0002372 | 0.0005849 | 0.216 | <a href="#">209493 at</a>    | <a href="#">PDZD2</a>    | PDZ domain containing 2                                                                                          |
| 1.58E-05  | 0.000119  | 0.215 | <a href="#">209590 at</a>    | <a href="#">BMP7</a>     | bone morphogenetic protein 7                                                                                     |
| 3.36E-05  | 0.0001731 | 0.212 | <a href="#">226374 at</a>    | <a href="#">NA</a>       | NA                                                                                                               |
| 1.94E-05  | 0.0001302 | 0.210 | <a href="#">207291 at</a>    | <a href="#">PRRG4</a>    | proline rich Gla (G-carboxyglutamic acid) 4 (transmembrane)                                                      |
| 3.83E-05  | 0.0001842 | 0.210 | <a href="#">202687 s at</a>  | <a href="#">TNFSF10</a>  | tumor necrosis factor (ligand) superfamily, member 10                                                            |
| 5.20E-06  | 7.35E-05  | 0.209 | <a href="#">219010 at</a>    | <a href="#">C1orf106</a> | chromosome 1 open reading frame 106                                                                              |
| 7.92E-05  | 0.000287  | 0.208 | <a href="#">211203 s at</a>  | <a href="#">CNTN1</a>    | contactin 1                                                                                                      |
| 0.0001629 | 0.0004398 | 0.208 | <a href="#">244264 at</a>    | <a href="#">KLRG2</a>    | killer cell lectin-like receptor subfamily G, member 2                                                           |
| 5.00E-06  | 7.16E-05  | 0.208 | <a href="#">225667 s at</a>  | <a href="#">FAM84A</a>   | family with sequence similarity 84, member A                                                                     |
| 9.40E-06  | 9.40E-05  | 0.207 | <a href="#">209125 at</a>    | <a href="#">KRT6A</a>    | keratin 6A                                                                                                       |
| 6.60E-06  | 8.10E-05  | 0.206 | <a href="#">209126 x at</a>  | <a href="#">KRT6B</a>    | keratin 6B                                                                                                       |
| 0.0008801 | 0.0015159 | 0.205 | <a href="#">1552714 at</a>   | <a href="#">CREG2</a>    | cellular repressor of E1A-stimulated genes 2                                                                     |
| 1.67E-05  | 0.0001214 | 0.205 | <a href="#">206698 at</a>    | <a href="#">XK</a>       | X-linked Kx blood group (McLeod syndrome)                                                                        |
| 0.0001195 | 0.0003661 | 0.204 | <a href="#">214549 x at</a>  | <a href="#">SPRR1A</a>   | small proline-rich protein 1A                                                                                    |
| 1.56E-05  | 0.0001184 | 0.204 | <a href="#">203797 at</a>    | <a href="#">VSNL1</a>    | visinin-like 1                                                                                                   |
| 1.30E-06  | 5.65E-05  | 0.203 | <a href="#">221854 at</a>    | <a href="#">PKP1</a>     | plakophilin 1 (ectodermal dysplasia/skin fragility syndrome)                                                     |
| 3.80E-06  | 6.75E-05  | 0.203 | <a href="#">223869 at</a>    | <a href="#">SOST</a>     | sclerosteosis                                                                                                    |
| 0.0001204 | 0.0003667 | 0.202 | <a href="#">1566766 a at</a> | <a href="#">MACC1</a>    | metastasis associated in colon cancer 1                                                                          |
| 4.66E-05  | 0.000203  | 0.200 | <a href="#">224997 x at</a>  | <a href="#">H19</a>      | H19, imprinted maternally expressed transcript (non-protein coding)                                              |
| 0.0004386 | 0.0008934 | 0.199 | <a href="#">232682 at</a>    | <a href="#">MREG</a>     | melanoregulin                                                                                                    |
| 9.25E-05  | 0.0003122 | 0.198 | <a href="#">237159 x at</a>  | <a href="#">AP1S3</a>    | adaptor-related protein complex 1, sigma 3 subunit                                                               |
| 0.0003208 | 0.0007174 | 0.197 | <a href="#">227202 at</a>    | <a href="#">CNTN1</a>    | contactin 1                                                                                                      |
| 3.11E-05  | 0.0001676 | 0.194 | <a href="#">231489 x at</a>  | <a href="#">NA</a>       | NA                                                                                                               |
| 2.37E-05  | 0.0001452 | 0.193 | <a href="#">1555383 a at</a> | <a href="#">POF1B</a>    | premature ovarian failure, 1B                                                                                    |
| 7.19E-05  | 0.0002691 | 0.192 | <a href="#">203528 at</a>    | <a href="#">SEMA4D</a>   | sema domain, immunoglobulin domain (Ig), transmembrane domain (TM) and short cytoplasmic domain, (semaphorin) 4D |
| 6.90E-06  | 8.21E-05  | 0.192 | <a href="#">202388 at</a>    | <a href="#">RGS2</a>     | regulator of G-protein signaling 2, 24kDa                                                                        |
| 2.00E-07  | 3.57E-05  | 0.192 | <a href="#">227492 at</a>    | <a href="#">NA</a>       | NA                                                                                                               |



|           |           |       |                             |                            |                                                                                                              |
|-----------|-----------|-------|-----------------------------|----------------------------|--------------------------------------------------------------------------------------------------------------|
| 0.0006496 | 0.001198  | 0.192 | <a href="#">206262 at</a>   | <a href="#">ADH1C</a>      | alcohol dehydrogenase 1C (class I), gamma polypeptide                                                        |
| 1.90E-06  | 5.65E-05  | 0.188 | <a href="#">232164 s at</a> | <a href="#">EPPK1</a>      | epiplakin 1                                                                                                  |
| 0.0007055 | 0.0012812 | 0.187 | <a href="#">1559361 at</a>  | <a href="#">MACC1</a>      | metastasis associated in colon cancer 1                                                                      |
| 1.03E-05  | 9.66E-05  | 0.187 | <a href="#">237885 at</a>   | <a href="#">NA</a>         | NA                                                                                                           |
| 1.80E-06  | 5.65E-05  | 0.186 | <a href="#">201839 s at</a> | <a href="#">EPCAM</a>      | epithelial cell adhesion molecule                                                                            |
| 0.0002225 | 0.0005559 | 0.183 | <a href="#">204751 x at</a> | <a href="#">DSC2</a>       | desmocollin 2                                                                                                |
| 1.35E-05  | 0.000111  | 0.177 | <a href="#">229513 at</a>   | <a href="#">STRBP</a>      | spermatid perinuclear RNA binding protein                                                                    |
| 9.93E-05  | 0.0003257 | 0.174 | <a href="#">205220 at</a>   | <a href="#">NIACR2</a>     | niacin receptor 2                                                                                            |
| 3.73E-05  | 0.0001825 | 0.174 | <a href="#">223423 at</a>   | <a href="#">GPR160</a>     | G protein-coupled receptor 160                                                                               |
| 2.46E-05  | 0.0001487 | 0.172 | <a href="#">213721 at</a>   | <a href="#">SOX2</a>       | SRY (sex determining region Y)-box 2                                                                         |
| 5.60E-06  | 7.63E-05  | 0.172 | <a href="#">203917 at</a>   | <a href="#">CXADR</a>      | coxsackie virus and adenovirus receptor                                                                      |
| 3.64E-05  | 0.0001789 | 0.171 | <a href="#">203641 s at</a> | <a href="#">COBLL1</a>     | COBL-like 1                                                                                                  |
| 6.93E-05  | 0.000262  | 0.171 | <a href="#">201689 s at</a> | <a href="#">TPD52</a>      | tumor protein D52                                                                                            |
| 2.92E-05  | 0.0001642 | 0.170 | <a href="#">219209 at</a>   | <a href="#">IFIH1</a>      | interferon induced with helicase C domain 1                                                                  |
| 2.18E-05  | 0.0001396 | 0.168 | <a href="#">223454 at</a>   | <a href="#">CXCL16</a>     | chemokine (C-X-C motif) ligand 16                                                                            |
| 5.39E-05  | 0.0002248 | 0.168 | <a href="#">203713 s at</a> | <a href="#">LLGL2</a>      | lethal giant larvae homolog 2 (Drosophila)                                                                   |
| 3.80E-06  | 6.75E-05  | 0.168 | <a href="#">226961 at</a>   | <a href="#">PRR15</a>      | proline rich 15                                                                                              |
| 0.0003008 | 0.0006884 | 0.167 | <a href="#">204798 at</a>   | <a href="#">MYB</a>        | v-myb myeloblastosis viral oncogene homolog (avian)                                                          |
| 0.0001324 | 0.0003881 | 0.166 | <a href="#">219412 at</a>   | <a href="#">RAB38</a>      | RAB38, member RAS oncogene family                                                                            |
| 0.0001476 | 0.0004151 | 0.166 | <a href="#">213796 at</a>   | <a href="#">SPRR1A</a>     | small proline-rich protein 1A                                                                                |
| 2.71E-05  | 0.0001559 | 0.165 | <a href="#">212095 s at</a> | <a href="#">MTUS1</a>      | mitochondrial tumor suppressor 1                                                                             |
| 3.80E-06  | 6.75E-05  | 0.165 | <a href="#">202790 at</a>   | <a href="#">CLDN7</a>      | claudin 7                                                                                                    |
| 3.92E-05  | 0.000187  | 0.164 | <a href="#">232056 at</a>   | <a href="#">SCEL</a>       | sciellin                                                                                                     |
| 1.01E-05  | 9.64E-05  | 0.163 | <a href="#">238692 at</a>   | <a href="#">BTBD11</a>     | BTB (POZ) domain containing 11                                                                               |
| 6.70E-06  | 8.10E-05  | 0.162 | <a href="#">221795 at</a>   | <a href="#">NTRK2</a>      | neurotrophic tyrosine kinase, receptor, type 2                                                               |
| 3.31E-05  | 0.0001713 | 0.162 | <a href="#">226899 at</a>   | <a href="#">UNC5B</a>      | unc-5 homolog B (C. elegans)                                                                                 |
| 2.00E-07  | 3.57E-05  | 0.161 | <a href="#">218186 at</a>   | <a href="#">RAB25</a>      | RAB25, member RAS oncogene family                                                                            |
| 1.00E-06  | 5.51E-05  | 0.161 | <a href="#">232151 at</a>   | <a href="#">MACC1</a>      | metastasis associated in colon cancer 1                                                                      |
| 7.00E-06  | 8.24E-05  | 0.159 | <a href="#">221796 at</a>   | <a href="#">NTRK2</a>      | neurotrophic tyrosine kinase, receptor, type 2                                                               |
| 0.0004462 | 0.0009048 | 0.158 | <a href="#">204320 at</a>   | <a href="#">COL11A1</a>    | collagen, type XI, alpha 1                                                                                   |
| 1.22E-05  | 0.0001041 | 0.158 | <a href="#">206884 s at</a> | <a href="#">SCEL</a>       | sciellin                                                                                                     |
| 0.0004816 | 0.0009602 | 0.156 | <a href="#">212909 at</a>   | <a href="#">LYPD1</a>      | LY6/PLAUR domain containing 1                                                                                |
| 7.70E-06  | 8.41E-05  | 0.155 | <a href="#">209591 s at</a> | <a href="#">BMP7</a>       | bone morphogenetic protein 7                                                                                 |
| 1.12E-05  | 0.0001009 | 0.153 | <a href="#">204542 at</a>   | <a href="#">ST6GALNAC2</a> | ST6 (alpha-N-acetyl-neuraminy-2,3-beta-galactosyl-1,3)-N-acetylgalactosaminide alpha-2,6-sialyltransferase 2 |
| 6.80E-05  | 0.0002597 | 0.149 | <a href="#">204567 s at</a> | <a href="#">ABCG1</a>      | ATP-binding cassette, sub-family G (WHITE), member 1                                                         |
| 4.41E-05  | 0.000196  | 0.149 | <a href="#">225792 at</a>   | <a href="#">HOOK1</a>      | hook homolog 1 (Drosophila)                                                                                  |
| 7.20E-06  | 8.26E-05  | 0.146 | <a href="#">219429 at</a>   | <a href="#">FA2H</a>       | fatty acid 2-hydroxylase                                                                                     |
| 5.90E-05  | 0.0002369 | 0.146 | <a href="#">227048 at</a>   | <a href="#">LAMA1</a>      | laminin, alpha 1                                                                                             |
| 3.64E-05  | 0.0001789 | 0.145 | <a href="#">231929 at</a>   | <a href="#">IKZF2</a>      | IKAROS family zinc finger 2 (Helios)                                                                         |
| 2.80E-06  | 6.21E-05  | 0.145 | <a href="#">216905 s at</a> | <a href="#">ST14</a>       | suppression of tumorigenicity 14 (colon carcinoma)                                                           |
| 0.0001556 | 0.0004311 | 0.143 | <a href="#">235852 at</a>   | <a href="#">STON2</a>      | stonin 2                                                                                                     |
| 4.00E-06  | 6.75E-05  | 0.143 | <a href="#">205190 at</a>   | <a href="#">PLS1</a>       | plastin 1 (I isoform)                                                                                        |

|           |           |       |                              |                              |                                                              |
|-----------|-----------|-------|------------------------------|------------------------------|--------------------------------------------------------------|
| 6.00E-07  | 4.84E-05  | 0.140 | <a href="#">227985 at</a>    | <a href="#">NA</a>           | NA                                                           |
| 3.14E-05  | 0.0001682 | 0.140 | <a href="#">227899 at</a>    | <a href="#">VIT</a>          | vitrin                                                       |
| 0.0008798 | 0.0015159 | 0.139 | <a href="#">224407 s at</a>  | <a href="#">RP6-213H19.1</a> | serine/threonine protein kinase MST4                         |
| 2.48E-05  | 0.0001493 | 0.136 | <a href="#">223278 at</a>    | <a href="#">GJB2</a>         | gap junction protein, beta 2, 26kDa                          |
| 8.86E-05  | 0.0003063 | 0.136 | <a href="#">218990 s at</a>  | <a href="#">SPRR3</a>        | small proline-rich protein 3                                 |
| 2.15E-05  | 0.0001389 | 0.136 | <a href="#">204364 s at</a>  | <a href="#">REEP1</a>        | receptor accessory protein 1                                 |
| 0.0002499 | 0.0006074 | 0.136 | <a href="#">212093 s at</a>  | <a href="#">MTUS1</a>        | mitochondrial tumor suppressor 1                             |
| 7.65E-05  | 0.0002808 | 0.135 | <a href="#">239155 at</a>    | <a href="#">CXADRP1</a>      | coxsackie virus and adenovirus receptor pseudogene 1         |
| 0.000122  | 0.0003683 | 0.132 | <a href="#">203798 s at</a>  | <a href="#">VSNL1</a>        | visinin-like 1                                               |
| 3.80E-06  | 6.75E-05  | 0.128 | <a href="#">209792 s at</a>  | <a href="#">KLK10</a>        | kallikrein-related peptidase 10                              |
| 1.03E-05  | 9.66E-05  | 0.126 | <a href="#">228051 at</a>    | <a href="#">LOC202451</a>    | hypothetical protein LOC202451                               |
| 0.000527  | 0.0010299 | 0.124 | <a href="#">201688 s at</a>  | <a href="#">TPD52</a>        | tumor protein D52                                            |
| 5.90E-06  | 7.80E-05  | 0.117 | <a href="#">201130 s at</a>  | <a href="#">CDH1</a>         | cadherin 1, type 1, E-cadherin (epithelial)                  |
| 4.00E-06  | 6.75E-05  | 0.113 | <a href="#">238513 at</a>    | <a href="#">PRRG4</a>        | proline rich Gla (G-carboxyglutamic acid) 4 (transmembrane)  |
| 8.38E-05  | 0.0002992 | 0.110 | <a href="#">1555731 a at</a> | <a href="#">AP1S3</a>        | adaptor-related protein complex 1, sigma 3 subunit           |
| 1.60E-06  | 5.65E-05  | 0.109 | <a href="#">213050 at</a>    | <a href="#">COBL</a>         | cordon-bleu homolog (mouse)                                  |
| 3.00E-07  | 3.57E-05  | 0.101 | <a href="#">204469 at</a>    | <a href="#">PTPRZ1</a>       | protein tyrosine phosphatase, receptor-type, Z polypeptide 1 |
| 2.25E-05  | 0.0001414 | 0.099 | <a href="#">215465 at</a>    | <a href="#">ABCA12</a>       | ATP-binding cassette, sub-family A (ABC1), member 12         |
| 2.41E-05  | 0.0001473 | 0.099 | <a href="#">212224 at</a>    | <a href="#">ALDH1A1</a>      | aldehyde dehydrogenase 1 family, member A1                   |
| 3.84E-05  | 0.0001843 | 0.099 | <a href="#">239196 at</a>    | <a href="#">ANKRD22</a>      | ankyrin repeat domain 22                                     |
| 3.45E-05  | 0.0001761 | 0.098 | <a href="#">205306 x at</a>  | <a href="#">KMO</a>          | kynurenine 3-monooxygenase (kynurenine 3-hydroxylase)        |
| 3.74E-05  | 0.0001826 | 0.097 | <a href="#">37892 at</a>     | <a href="#">COL11A1</a>      | collagen, type XI, alpha 1                                   |
| 1.10E-06  | 5.65E-05  | 0.094 | <a href="#">211138 s at</a>  | <a href="#">KMO</a>          | kynurenine 3-monooxygenase (kynurenine 3-hydroxylase)        |
| 3.00E-07  | 3.57E-05  | 0.091 | <a href="#">218966 at</a>    | <a href="#">MYO5C</a>        | myosin VC                                                    |
| 3.50E-06  | 6.75E-05  | 0.088 | <a href="#">202718 at</a>    | <a href="#">IGFBP2</a>       | insulin-like growth factor binding protein 2, 36kDa          |
| 8.00E-07  | 5.36E-05  | 0.088 | <a href="#">207935 s at</a>  | <a href="#">KRT13</a>        | keratin 13                                                   |
| 1.90E-06  | 5.65E-05  | 0.087 | <a href="#">222830 at</a>    | <a href="#">GRHL1</a>        | grainyhead-like 1 (Drosophila)                               |
| 1.55E-05  | 0.000118  | 0.082 | <a href="#">205064 at</a>    | <a href="#">SPRR1B</a>       | small proline-rich protein 1B (cornifin)                     |
| 1.50E-06  | 5.65E-05  | 0.082 | <a href="#">203571 s at</a>  | <a href="#">C10orf116</a>    | chromosome 10 open reading frame 116                         |
| 3.80E-05  | 0.0001836 | 0.078 | <a href="#">203453 at</a>    | <a href="#">SCNN1A</a>       | sodium channel, nonvoltage-gated 1 alpha                     |
| 6.30E-06  | 7.96E-05  | 0.075 | <a href="#">211361 s at</a>  | <a href="#">SERPINB13</a>    | serpin peptidase inhibitor, clade B (ovalbumin), member 13   |
| 1.11E-05  | 0.0001004 | 0.073 | <a href="#">205569 at</a>    | <a href="#">LAMP3</a>        | lysosomal-associated membrane protein 3                      |
| 9.60E-06  | 9.41E-05  | 0.071 | <a href="#">238439 at</a>    | <a href="#">ANKRD22</a>      | ankyrin repeat domain 22                                     |
| 1.90E-06  | 5.65E-05  | 0.068 | <a href="#">215692 s at</a>  | <a href="#">MPPED2</a>       | metallophosphoesterase domain containing 2                   |
| 4.70E-06  | 7.04E-05  | 0.063 | <a href="#">217272 s at</a>  | <a href="#">SERPINB13</a>    | serpin peptidase inhibitor, clade B (ovalbumin), member 13   |
| 1.00E-07  | 3.57E-05  | 0.042 | <a href="#">209173 at</a>    | <a href="#">AGR2</a>         | anterior gradient homolog 2 (Xenopus laevis)                 |
| 7.80E-06  | 8.44E-05  | 0.036 | <a href="#">205413 at</a>    | <a href="#">MPPED2</a>       | metallophosphoesterase domain containing 2                   |
| < 1e-07   | < 1e-07   | 0.032 | <a href="#">231771 at</a>    | <a href="#">GJB6</a>         | gap junction protein, beta 6, 30kDa                          |
| 2.70E-06  | 6.21E-05  | 0.028 | <a href="#">213240 s at</a>  | <a href="#">KRT4</a>         | keratin 4                                                    |
